# Supplementary material
Source: PubMed Central journal article supplement (PMC4334231)

## Supporting Information

### Cycloadditions of Non-Complementary Substituted 1,2,3-Triazines

Erin D. Anderson, Adam S. Duerfeldt, Kaicheng Zhu, Christopher M. Glinkerman, and Dale L. Boger\*

*Department of Chemistry and the Skaggs Institute for Chemical Biology, The Scripps Research Institute, 10550 North Torrey Pines Road, La Jolla, California 92037, United States*

#### Table of Contents

|      |                                           |         |
|------|-------------------------------------------|---------|
| I.   | Synthesis of Substituted 1,2,3-Triazines  | S2–S5   |
| II.  | Reaction of 1,2,3-Triazines with Amidines | S6–S14  |
| III. | Reaction of 1,2,3-Triazines with Enamines | S15–S17 |
| IV.  | Reaction of 1,2,3-Triazines with Ynamines | S18–S20 |
| V.   | References                                | S20–S20 |
| VI.  | <sup>1</sup> H NMR Spectra                | S21–S72 |

## I. Synthesis of Substituted 1,2,3-Triazines

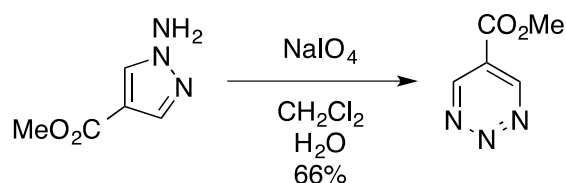

**Methyl 1,2,3-Triazine-5-carboxylate (3).** A mechanically stirred solution of methyl 1-amino-1*H*-pyrazole-4-carboxylate<sup>1</sup> (6.50 g, 46.1 mmol) in 1 L of dichloromethane at 0 °C was treated with a 0 °C solution of sodium periodate (19.70 g, 92.10 mmol) in 1 L of distilled water over 2 min. Stirring was intensified to yield a fine emulsion and the mixture was allowed to react for 15 min. The organic layer was separated and the aqueous layer was washed with dichloromethane (2 × 200 mL). The combined organic layers were dried over Na<sub>2</sub>SO<sub>4</sub> and concentrated in vacuo. Flash chromatography (SiO<sub>2</sub> 50% Et<sub>2</sub>O/hexanes) afforded **3** (4.22 g, 66%) as a light yellow solid: mp 45–46 °C; <sup>1</sup>H NMR (CDCl<sub>3</sub>, 400 MHz) δ 9.45 (d, *J* = 2.5 Hz, 2H), 4.05 (s, 3H); <sup>13</sup>C (acetone-*d*<sub>6</sub>, 125 MHz) δ 178.7, 149.8, 130.1, 54.8; IR (film)  $\nu_{\text{max}}$  2953, 1712 cm<sup>-1</sup>; HRESI-TOF *m/z* 140.0454 (C<sub>5</sub>H<sub>5</sub>N<sub>3</sub>O<sub>2</sub> + H<sup>+</sup> requires 140.0454).

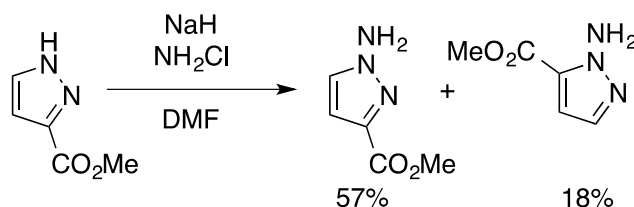

**Methyl 1-Amino-1*H*-pyrazole-3-carboxylate (S1) & Methyl 1-Amino-1*H*-pyrazole-5-carboxylate (S2).** A solution of 3-carbomethoxypyrazole<sup>2</sup> (1.26 g, 10.0 mmol) in DMF (20 mL) was treated with sodium hydride (60% in mineral oil) (480 mg, 12.0 mmol). The reaction mixture was stirred for 45 min at room temperature and then a 0.15 M solution of monochloramine<sup>3</sup> in diethyl ether (83 mL, 12.0 mmol) was added. The reaction mixture was stirred at room temperature for 1 h. After 1 h, saturated aqueous Na<sub>2</sub>S<sub>2</sub>O<sub>3</sub> (70 mL), H<sub>2</sub>O (70 mL), and EtOAc (150 mL) were added to the reaction mixture. The organic layer was separated and the aqueous layer was extracted with EtOAc (150 mL). The combined organic extracts were dried over Na<sub>2</sub>SO<sub>4</sub> and concentrated on a rotary evaporator. Flash chromatography (SiO<sub>2</sub>, 20% EtOAc/toluene) provided the title products as an off-white crystalline solid (**S1**, 809 mg, 57%) and as a pale yellow oil (**S2**, 257 mg, 18%): For **S1**: mp 97–99 °C; <sup>1</sup>H NMR (CDCl<sub>3</sub>, 400 MHz) δ 7.44 (d, *J* = 2.4 Hz, 1H), 6.74 (d, *J* = 2.4 Hz, 1H), 5.41 (bs, 2H), 3.93 (s, 3H); <sup>13</sup>C NMR (CDCl<sub>3</sub>, 125 MHz) δ 162.2, 140.3, 130.5, 107.5, 51.8; IR (film)  $\nu_{\text{max}}$  3308, 3207, 3127, 3107, 1727, 1651, 1273, 1148, 767 cm<sup>-1</sup>; ESI-TOF HRMS *m/z* 142.0611 ([M + H]<sup>+</sup>, C<sub>5</sub>H<sub>7</sub>N<sub>3</sub>O<sub>2</sub> + H<sup>+</sup> requires 142.0611). For **S2**: <sup>1</sup>H NMR (CDCl<sub>3</sub>, 400 MHz) δ 7.30 (d, *J* = 2.0 Hz, 1H), 6.73 (d, *J* = 2.4 Hz, 1H), 6.27 (bs, 2H), 3.89 (s, 3H); <sup>13</sup>C NMR (CDCl<sub>3</sub>, 125 MHz) δ 160.7, 134.1, 127.0, 109.2, 52.1; IR (film)  $\nu_{\text{max}}$  3338, 1716, 1519, 1320, 1260, 1092, 758 cm<sup>-1</sup>; HRESI-TOF *m/z* 142.0611 (C<sub>5</sub>H<sub>7</sub>N<sub>3</sub>O<sub>2</sub> + H<sup>+</sup> requires 142.0611).

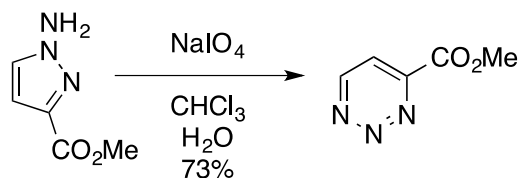

**Methyl 1,2,3-Triazine-4-carboxylate (5).** A solution of NaIO<sub>4</sub> (1.02 g, 4.79 mmol) in 40 mL of distilled water was added to a stirring solution of methyl 1-amino-1*H*-pyrazole-3-carboxylate (**S1**, 340 mg, 2.35 mmol) in 40 mL of dichloromethane at 0 °C. The reaction mixture was allowed to warm to room temperature and stirred at room temperature for 2 h. After 2 h, the organic layer was separated. The aqueous layer was extracted with CH<sub>2</sub>Cl<sub>2</sub> (10 mL). The combined organic extracts were dried over Na<sub>2</sub>SO<sub>4</sub> and concentrated on a rotary

evaporator. Flash chromatography (SiO<sub>2</sub> 5% acetone/toluene) provided **5** (180 mg, 54%; 50–73%) as an off-white solid: mp 85–90 °C (hexanes); <sup>1</sup>H NMR (CDCl<sub>3</sub>, 400 MHz) δ 9.34 (d, *J* = 6.0 Hz, 1H), 8.03 (d, *J* = 6.0 Hz, 1H), 4.13 (s, 3H); <sup>13</sup>C NMR (CDCl<sub>3</sub>, 100 MHz) δ 163.2, 151.4, 148.8, 117.5, 54.0; IR (film) ν<sub>max</sub> 1731, 1439, 1312, 1267, 1196, 1158, 1123, 1059, 998, 958, 924, 892, 8378, 804, 778, 764, 735, 709 cm<sup>-1</sup>; HRESI-TOF *m/z* 140.0453 (C<sub>5</sub>H<sub>5</sub>N<sub>3</sub>O<sub>2</sub> + H<sup>+</sup> requires 140.0455).

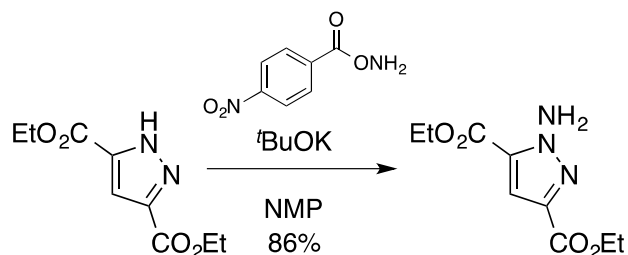

**Diethyl 1-Amino-1*H*-pyrazole-3,5-dicarboxylate (S3).** A solution of <sup>t</sup>BuOK (775 mg, 6.91 mmol) in NMP (6.9 mL) was added to a stirred solution of 3,5-dicarboethoxypyrazole<sup>4</sup> (1.33 g, 6.28 mmol) in NMP (8.1 mL). The reaction mixture was stirred for 20 min at room temperature and then a solution of *O*-4-nitrobenzoylhydroxylamine<sup>5</sup> (1.14 g, 6.28 mmol) in NMP (4.3 mL) was added dropwise while keeping the internal reaction temperature below 25 °C. The reaction mixture was stirred at room temperature for 1 h. After 1 h, 10% aqueous NaCl (25 mL) and EtOAc (25 mL) were added to the reaction mixture. The organic layer was separated and the aqueous layer was extracted EtOAc (25 mL). The combined organic extracts were washed with 5% aqueous NaHCO<sub>3</sub> (15 mL) and H<sub>2</sub>O (3 × 15 mL), dried over Na<sub>2</sub>SO<sub>4</sub>, and concentrated on a rotary evaporator. Flash chromatography (SiO<sub>2</sub> 30% EtOAc/hexanes) provided the title compound (1.22 g, 86%) as an off-white solid: mp 63–64 °C; <sup>1</sup>H NMR (CDCl<sub>3</sub>, 600 MHz) δ 7.18 (s, 1H), 6.84 (bs, 2H), 4.33 (q, *J* = 7.2 Hz, 2H), 4.31 (q, *J* = 7.2 Hz, 2H), 1.33 (t, *J* = 7.2 Hz, 3H), 1.31 (t, *J* = 7.2 Hz, 3H); <sup>13</sup>C NMR (CDCl<sub>3</sub>, 100 MHz) δ 161.2, 159.8, 137.4, 127.54, 127.49, 111.89, 111.84, 61.8, 61.2, 14.3, 14.1; IR (film) ν<sub>max</sub> 1714, 1532, 1270, 1218, 1200, 1160, 1109, 1078, 998, 960, 926, 853, 757, 718 cm<sup>-1</sup>; HRESI-TOF *m/z* 228.0980 (C<sub>9</sub>H<sub>13</sub>N<sub>3</sub>O<sub>4</sub> + H<sup>+</sup> requires 228.0979).

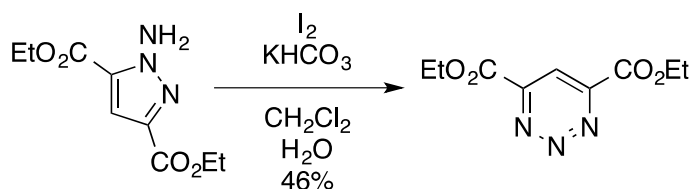

**Diethyl 1,2,3-Triazine-4,6-dicarboxylate (6).** Diethyl 1-amino-1*H*-pyrazole-3,5-dicarboxylate (**S3**, 340 mg, 1.50 mmol) was dissolved in CH<sub>2</sub>Cl<sub>2</sub>–20% aqueous KHCO<sub>3</sub> (15 mL, 1:1), cooled in an ice bath, and stirred while I<sub>2</sub> (570 mg, 2.25 mmol) in CH<sub>2</sub>Cl<sub>2</sub> (15 mL) was added by an addition funnel. The reaction mixture was stirred at room temperature for 1 h. After 1 h, saturated aqueous Na<sub>2</sub>SO<sub>3</sub> was added to quench the reaction mixture and the organic layer was separated. The aqueous layer was extracted with CH<sub>2</sub>Cl<sub>2</sub> (2 × 25 mL). The combined organic layers were washed with H<sub>2</sub>O (25 mL), dried over Na<sub>2</sub>SO<sub>4</sub> and concentrated on a rotary evaporator. Flash chromatography (SiO<sub>2</sub>, 3% acetone/toluene) provided **6** (142 mg, 42%; 40–46%) as a yellow solid: mp 85 °C (hexanes); <sup>1</sup>H NMR (CDCl<sub>3</sub>, 400 MHz) δ 8.55 (s, 1H), 4.61 (q, *J* = 7.2 Hz, 4H), 1.51 (t, *J* = 7.2 Hz, 6H); <sup>13</sup>C NMR (CDCl<sub>3</sub>, 100 MHz) δ 162.6, 151.4, 117.7, 64.3, 14.6; IR (film) ν<sub>max</sub> 1721, 1384, 1368, 1351, 1263, 1092, 1014, 957, 857, 803, 761, 718 cm<sup>-1</sup>; HRESI-TOF *m/z* 226.0822 (C<sub>9</sub>H<sub>11</sub>N<sub>3</sub>O<sub>4</sub> + H<sup>+</sup> requires 226.0822).

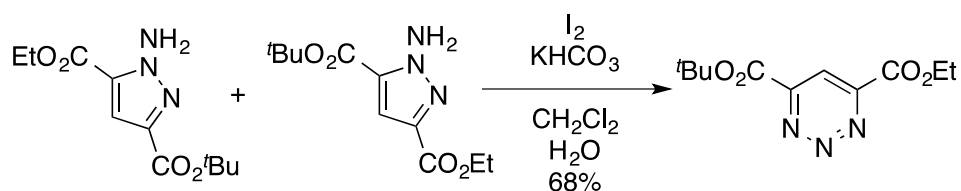

**4-(*tert*-Butyl) 6-Ethyl 5-Methyl-1,2,3-Triazine-4,6-dicarboxylate (7).** Compound 7 was prepared as described elsewhere.<sup>3</sup>

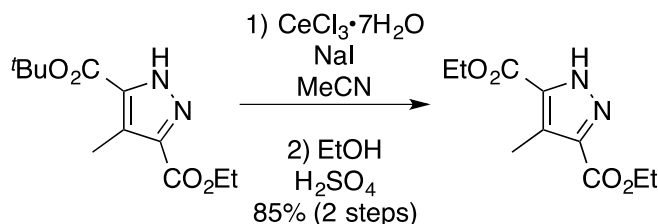

**Diethyl 4-Methyl-1*H*-pyrazole-3,5-dicarboxylate (S4).** Compound S4 can be prepared as described elsewhere.<sup>7</sup> Alternatively,  $CeCl_3 \cdot 7H_2O$  (2.08 g, 5.57 mmol) was added to a stirred solution of 5-(*tert*-butyl) 3-ethyl 4-methyl-1*H*-pyrazole-3,5-dicarboxylate<sup>8</sup> (944 mg, 3.71 mmol) and  $NaI$  (723 mg, 4.82 mmol) in  $MeCN$  (35 mL). The resulting reaction mixture was warmed to 82 °C and stirred at 82 °C for 1 h. After 1 h the reaction mixture was diluted with  $Et_2O$  (50 mL) and treated with 0.5 M  $HCl$  (50 mL). The organic layer was separated and the aqueous layer was extracted with  $Et_2O$  ( $3 \times 75$  mL). The combined organic layers were washed with saturated aqueous  $NaCl$  ( $2 \times 50$  mL), dried over  $Na_2SO_4$  and concentrated on a rotary evaporator. The crude extract was warmed at 80 °C in  $EtOH$  (15 mL) with  $H_2SO_4$  (6 drops) for 12 h. After 12 h, the reaction mixture was concentrated. Flash chromatography ( $SiO_2$ , 40%  $EtOAc$ /hexanes) provided the title compound (714 mg, 85%) as an off-white solid: mp 80–85 °C;  $^1H$  NMR ( $CDCl_3$ , 400 MHz)  $\delta$  4.35 (q,  $J = 6.8$  Hz, 4H), 2.52 (s, 3H), 1.34 (t,  $J = 6.8$  Hz, 6H);  $^{13}C$  NMR ( $CDCl_3$ , 100 MHz)  $\delta$  161.0, 137.1, 124.5, 61.0, 14.0, 9.3; IR (film)  $\nu_{max}$  1717, 1448, 1381, 1292, 1261, 1232, 1199, 1130, 1063, 1017, 964, 848, 786, 639  $cm^{-1}$ ; HRESI-TOF  $m/z$  227.1025 ( $C_{10}H_{14}N_2O_4 + H^+$  requires 227.1025).

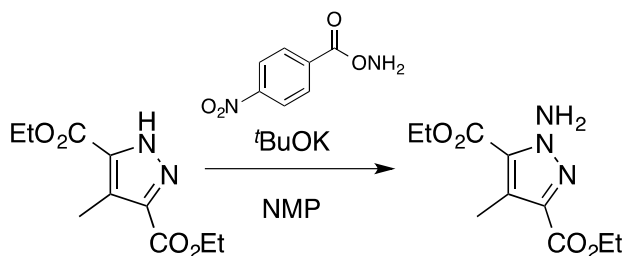

**Diethyl 1-Amino-4-methyl-1*H*-pyrazole-3,5-dicarboxylate (S5).** A solution of  $tBuOK$  (818 mg, 7.29 mmol) in  $NMP$  (7.3 mL) was added to a stirred solution of 3,5-dicarboethoxy-4-methyl-1*H*-pyrazole (S4, 1.51 g, 6.63 mmol) in  $NMP$  (11 mL). The reaction mixture was stirred for 20 min at room temperature and then a solution of *O*-4-nitrobenzoylhydroxylamine<sup>5</sup> (1.21 g, 6.63 mmol) in  $NMP$  (5.2 mL) was added dropwise while keeping the internal reaction temperature below 25 °C. The reaction mixture was stirred at room temperature for 1 h. After 1 h, 10% aqueous  $NaCl$  (25 mL) and  $EtOAc$  (25 mL) were added to the reaction mixture. The organic layer was separated and the aqueous layer was extracted  $EtOAc$  (25 mL). The combined organic extracts were washed with 5% aqueous  $NaHCO_3$  (15 mL) and  $H_2O$  ( $3 \times 15$  mL), dried over  $Na_2SO_4$ , and concentrated on a rotary evaporator to provide the title product. The crude material was carried on to the next step without further purification.

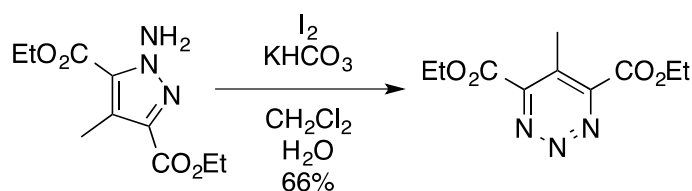

**Diethyl 5-Methyl-1,2,3-triazine-4,6-dicarboxylate (8).** Diethyl 1-amino-4-methyl-1*H*-pyrazole-3,5-dicarboxylate (**S5**, 1.45 g, 6.01 mmol) was dissolved in CH<sub>2</sub>Cl<sub>2</sub>–20% aqueous KHCO<sub>3</sub> (60 mL, 1:1), cooled in an ice bath, and stirred while I<sub>2</sub> (3.05 g, 12.0 mmol) in CH<sub>2</sub>Cl<sub>2</sub> (140 mL) was added by an addition funnel. After the addition was complete, the reaction mixture was allowed to warm to room temperature and stirred for 1 h. After 1 h, saturated aqueous Na<sub>2</sub>SO<sub>3</sub> was added to quench the reaction mixture and the organic layer was separated. The aqueous layer was extracted with CH<sub>2</sub>Cl<sub>2</sub> (75 mL). The combined organic layers were washed with H<sub>2</sub>O (75 mL), dried over Na<sub>2</sub>SO<sub>4</sub> and concentrated on a rotary evaporator. Flash chromatography (SiO<sub>2</sub>, 15–20% EtOAc/hexanes) provided **8** (950 mg, 66%) as a light yellow oil: <sup>1</sup>H NMR (CDCl<sub>3</sub>, 600 MHz) δ 4.55 (q, *J* = 7.2 Hz, 4H), 2.66 (s, 3H), 1.47 (t, *J* = 7.2 Hz, 6H); <sup>13</sup>C NMR (CDCl<sub>3</sub>, 100 MHz) δ 163.0, 152.3, 127.7, 63.3, 14.1, 13.7; IR (film) ν<sub>max</sub> 1731, 1424, 1381, 1275, 1150, 1096, 1050, 1016 cm<sup>-1</sup>; HRESI-TOF *m/z* 240.0977 (C<sub>10</sub>H<sub>13</sub>N<sub>3</sub>O<sub>4</sub> + H<sup>+</sup> requires 240.0979).

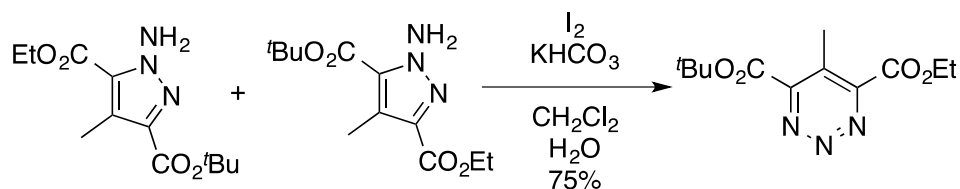

**4-(*tert*-Butyl) 6-Ethyl 5-Methyl-1,2,3-Triazine-4,6-dicarboxylate (9).** Compound **9** was prepared as described elsewhere.<sup>3</sup>

## II. Reaction of 1,2,3-Triazines with Amidines

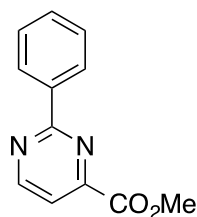

**Methyl 2-Phenylpyrimidine-4-carboxylate (11a).** A solution of **5** (11.0 mg, 0.08 mmol, 1.5 equiv) in CH<sub>3</sub>CN (170  $\mu$ L) stirring with crushed 4 Å molecule sieves was treated dropwise with a solution of **10a** (6.3 mg, 0.053 mmol, 1.0 equiv) in CH<sub>3</sub>CN (175  $\mu$ L) at room temperature. The reaction mixture was stirred for 1 h, at which time the mixture was purified by preparative TLC (50% EtOAc/hexanes) to provide **11a** (8.1 mg, 71%): <sup>1</sup>H NMR (CDCl<sub>3</sub>, 500 MHz)  $\delta$  9.03 (d,  $J$  = 5.0 Hz, 1H), 8.57–8.47 (m, 2H), 7.85 (d,  $J$  = 4.9 Hz, 1H), 7.56–7.47 (m, 3H), 4.05 (s, 3H); <sup>13</sup>C NMR (CDCl<sub>3</sub>, 125 MHz)  $\delta$  165.5, 165.2, 159.4, 155.4, 136.9, 131.4, 128.8 (2C), 128.7 (2C), 118.5, 53.4; IR (film)  $\nu_{\max}$  2954, 1752, 1728, 1561, 1459, 1427, 1329, 1386, 1309, 1279, 1197, 1154, 1084, 864, 740, 691, 645 cm<sup>-1</sup>; HRESI-TOF  $m/z$  215.0816 (C<sub>12</sub>H<sub>10</sub>N<sub>2</sub>O<sub>2</sub> + H<sup>+</sup> requires 215.0815).

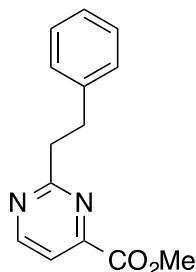

**Methyl 2-(2-Phenylethyl)pyrimidine-4-carboxylate (11b).** A solution of **5** (11.0 mg, 0.08 mmol, 2.0 equiv) in CH<sub>3</sub>CN (170  $\mu$ L) stirring with crushed 4 Å molecule sieves was treated dropwise with a solution of **10b** (6.0 mg, 0.04 mmol, 1.0 equiv) in CH<sub>3</sub>CN (135  $\mu$ L) at room temperature. The reaction mixture was stirred for 1 h, at which time the mixture was purified by preparative TLC (40% EtOAc/hexanes) to provide **11b** (8.1 mg, 84%): <sup>1</sup>H NMR (CDCl<sub>3</sub>, 500 MHz)  $\delta$  8.91 (d,  $J$  = 4.9 Hz, 1H), 7.82 (d,  $J$  = 4.9 Hz, 1H), 7.31–7.23 (m, 4H), 7.22–7.15 (m, 1H), 4.03 (s, 3H), 3.45–3.37 (m, 2H), 3.23–3.16 (m, 2H); <sup>13</sup>C NMR (CDCl<sub>3</sub>, 125 MHz)  $\delta$  171.5, 165.0, 159.2, 155.2, 141.2, 128.59 (2C), 128.55 (2C), 126.2, 118.3, 53.6, 41.1, 34.7; IR (film)  $\nu_{\max}$  3027, 2953, 1730, 1603, 1564, 1496, 1433, 1396, 1317, 1199, 1150, 1074, 999, 865, 769, 701, 684 cm<sup>-1</sup>; HRESI-TOF  $m/z$  243.1129 (C<sub>14</sub>H<sub>14</sub>N<sub>2</sub>O<sub>2</sub> + H<sup>+</sup> requires 243.1128).

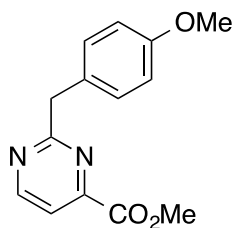

**Methyl 2-(4-Methoxybenzyl)pyrimidine-4-carboxylate (11c).** A solution of **5** (11.0 mg, 0.08 mmol, 2.0 equiv) in CH<sub>3</sub>CN (170  $\mu$ L) stirring with crushed 4 Å molecule sieves was treated dropwise with a solution of **10c** (6.5 mg, 0.04 mmol, 1.0 equiv) in CH<sub>3</sub>CN (135  $\mu$ L) at room temperature. The reaction mixture was stirred for 1 h, at which time the mixture was purified by preparative TLC (50% EtOAc/hexanes) to provide **11c** (10.1 mg, 98%): <sup>1</sup>H NMR (CDCl<sub>3</sub>, 500 MHz)  $\delta$  8.90 (d,  $J$  = 4.9 Hz, 1H), 7.80 (d,  $J$  = 4.9 Hz, 1H), 7.30 (d,  $J$  = 8.2 Hz, 2H), 6.84 (d,  $J$  = 8.8 Hz, 2H), 4.36 (s, 2H), 4.03 (s, 3H), 3.77 (s, 3H); <sup>13</sup>C NMR (CDCl<sub>3</sub>, 125 MHz)  $\delta$  171.2, 165.0, 159.6, 158.6, 155.3, 130.4 (2C), 130.0, 118.3, 114.1 (2C), 55.4, 53.6, 45.1; IR (film)  $\nu_{\max}$  2953, 2836,

1749, 1731, 1611, 1563, 1511, 1433, 1390, 1319, 1299, 1246, 1205, 1179, 1150, 1109, 1033, 995, 808, 781, 727, 683, 630  $\text{cm}^{-1}$ ; HRESI-TOF  $m/z$  259.1076 ( $\text{C}_{14}\text{H}_{14}\text{N}_2\text{O}_3 + \text{H}^+$  requires 259.1077).

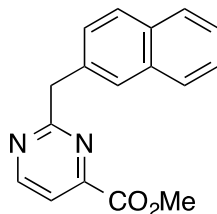

**Methyl 2-(Naphthalen-2-ylmethyl)pyrimidine-4-carboxylate (11d).** A solution of **5** (11.0 mg, 0.08 mmol, 1.5 equiv) in  $\text{CH}_3\text{CN}$  (171  $\mu\text{L}$ ) stirring with crushed 4 Å molecule sieves was treated dropwise with a solution of **10d** (6.5 mg, 0.053 mmol, 1.0 equiv) in  $\text{CH}_3\text{CN}$  (177  $\mu\text{L}$ ) at room temperature. The reaction mixture was stirred for 1 h, at which time the mixture was purified by preparative TLC (40% EtOAc/hexanes) to provide **11d** (10.0 mg, 68%):  $^1\text{H}$  NMR ( $\text{CDCl}_3$ , 500 MHz)  $\delta$  8.84 (d,  $J = 4.9$  Hz, 1H), 8.19–8.13 (m, 1H), 7.88–7.81 (m, 1H), 7.80–7.75 (m, 2H), 7.52–7.41 (m, 4H), 4.88 (s, 2H), 4.04 (s, 3H);  $^{13}\text{C}$  NMR ( $\text{CDCl}_3$ , 125 MHz)  $\delta$  171.0, 165.0, 159.6, 155.2, 134.4, 134.0, 132.3, 128.8, 128.0, 127.8, 126.2, 125.8, 125.7, 124.6, 118.2, 53.6, 43.7; IR (film)  $\nu_{\text{max}}$  3040, 2950, 1750, 1731, 1562, 1510, 1432, 1388, 1322, 1293, 1202, 1150, 994, 795, 780, 685, 515  $\text{cm}^{-1}$ ; HRESI-TOF  $m/z$  279.1131 ( $\text{C}_{17}\text{H}_{14}\text{N}_2\text{O}_2 + \text{H}^+$  requires 279.1128).

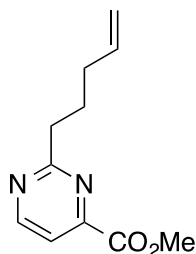

**Methyl 2-(Pent-4-en-1-yl)pyrimidine-4-carboxylate (11e).** A solution of **5** (11.0 mg, 0.08 mmol, 1.5 equiv) in  $\text{CH}_3\text{CN}$  (171  $\mu\text{L}$ ) stirring with crushed 4 Å molecule sieves was treated dropwise with a solution of **10e** (5.9 mg, 0.053 mmol, 1.0 equiv) in  $\text{CH}_3\text{CN}$  (177  $\mu\text{L}$ ) at room temperature. The reaction mixture was stirred for 1 h, at which time the mixture was purified by preparative TLC (40% EtOAc/hexanes) to provide **11e** (7.7 mg, 71%):  $^1\text{H}$  NMR ( $\text{CDCl}_3$ , 500 MHz)  $\delta$  8.90 (d,  $J = 4.9$  Hz, 1H), 7.81 (d,  $J = 5.0$  Hz, 1H), 5.84 (ddt,  $J = 17.0$ , 10.1, 6.7 Hz, 1H), 5.03 (dd,  $J = 17.4$ , 1.6 Hz, 1H), 4.97 (dd,  $J = 10.3$ , 1.1 Hz, 1H), 4.02 (s, 3H), 3.14–3.06 (m, 2H), 2.16 (q,  $J = 7.2$  Hz, 2H), 1.96 (p,  $J = 7.6$  Hz, 2H);  $^{13}\text{C}$  NMR ( $\text{CDCl}_3$ , 125 MHz)  $\delta$  172.4, 165.1, 159.2, 155.0, 138.2, 118.1, 115.2, 53.5, 39.1, 33.6, 28.1; IR (film)  $\nu_{\text{max}}$  2954, 2934, 2854, 1752, 1732, 1640, 1564, 1434, 1398, 1316, 1200, 1151, 995, 913, 795, 769, 683  $\text{cm}^{-1}$ ; HRESI-TOF  $m/z$  207.1133 ( $\text{C}_{11}\text{H}_{14}\text{N}_2\text{O}_2 + \text{H}^+$  requires 207.1128).

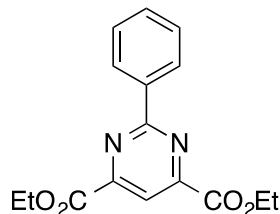

**Diethyl 2-Phenylpyrimidine-4,6-dicarboxylate (12a).** A solution of **6** (20.0 mg, 0.09 mmol, 2.0 equiv) in  $\text{CH}_3\text{CN}$  (193  $\mu\text{L}$ ) stirring with crushed 4 Å molecule sieves was treated dropwise with a solution of **10a** (5.4 mg, 0.045 mmol, 1.0 equiv) in  $\text{CH}_3\text{CN}$  (150  $\mu\text{L}$ ) at room temperature. The reaction mixture was stirred for 4 h, at which time the mixture was purified by preparative TLC (30% EtOAc/hexanes) to provide **12a** (4.1 mg, 30%):  $^1\text{H}$  NMR ( $\text{CDCl}_3$ , 500 MHz)  $\delta$  8.60 (dt,  $J = 7.6$ , 1.9 Hz, 2H), 8.43 (s, 1H), 7.56–7.50 (m, 3H), 4.54 (q,  $J = 7.2$  Hz, 4H), 1.49 (t,  $J = 7.2$  Hz, 6H);  $^{13}\text{C}$  NMR ( $\text{CDCl}_3$ , 150 MHz)  $\delta$  166.2 (2C), 164.1, 158.0 (2C), 136.3, 131.9, 129.1 (2C), 128.9 (2C), 117.9, 63.0 (2C), 14.7 (2C); IR (film)  $\nu_{\text{max}}$  2923, 1741, 1556, 1379, 1331, 1225, 1194, 1100, 1022, 741  $\text{cm}^{-1}$ ; HRESI-TOF  $m/z$  301.1184 ( $\text{C}_{16}\text{H}_{16}\text{N}_2\text{O}_4 + \text{H}^+$  requires 301.1183).

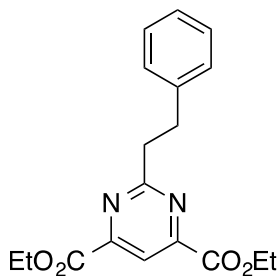

**Diethyl 2-(2-Phenylethyl)pyrimidine-4,6-dicarboxylate (12b).** A solution of **6** (20.0 mg, 0.09 mmol, 2.0 equiv) in CH<sub>3</sub>CN (193  $\mu$ L) stirring with crushed 4 Å molecule sieves was treated dropwise with a solution of **10b** (6.7 mg, 0.045 mmol, 1.0 equiv) in CH<sub>3</sub>CN (150  $\mu$ L) at room temperature. The reaction mixture was stirred for 4 h, at which time the mixture was purified by preparative TLC (30% EtOAc/hexanes) to provide **12b** (9.1 mg, 61%): <sup>1</sup>H NMR (CDCl<sub>3</sub>, 500 MHz)  $\delta$  8.38 (s, 1H), 7.30–7.21 (m, 4H), 7.16 (td, *J* = 6.5, 2.9 Hz, 1H), 4.50 (q, *J* = 7.1 Hz, 4H), 3.56–3.43 (m, 2H), 3.21 (dd, *J* = 9.4, 6.9 Hz, 2H), 1.44 (t, *J* = 7.1 Hz, 6H); <sup>13</sup>C NMR (CDCl<sub>3</sub>, 125 MHz)  $\delta$  172.4 (2C), 163.9, 157.7 (2C), 141.1, 128.7 (2C), 128.5 (2C), 126.2, 117.8, 63.0 (2C), 41.0, 34.5, 14.4 (2C); IR (film)  $\nu_{\text{max}}$  2982, 2932, 1750, 1729, 1555, 1496, 1453, 1383, 1247, 1199, 1102, 1023, 916, 861, 756, 722, 701 cm<sup>-1</sup>; HRESI-TOF *m/z* 329.1501 (C<sub>18</sub>H<sub>20</sub>N<sub>2</sub>O<sub>4</sub> + H<sup>+</sup> requires 329.1496).

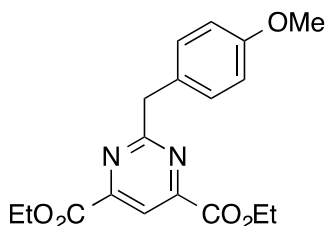

**Diethyl 2-(4-Methoxybenzyl)pyrimidine-4,6-dicarboxylate (12c).** A solution of **6** (20.0 mg, 0.09 mmol, 2.0 equiv) in CH<sub>3</sub>CN (193  $\mu$ L) stirring with crushed 4 Å molecule sieves was treated dropwise with a solution of **10c** (7.4 mg, 0.045 mmol, 1.0 equiv) in CH<sub>3</sub>CN (150  $\mu$ L) at room temperature. The reaction mixture was stirred for 4 h, at which time the mixture was purified by preparative TLC (40% EtOAc/hexanes) to provide **12c** (9.4 mg, 61%): <sup>1</sup>H NMR (CDCl<sub>3</sub>, 500 MHz)  $\delta$  8.38 (s, 1H), 7.35 (d, *J* = 8.3 Hz, 2H), 6.82 (d, *J* = 8.4 Hz, 2H), 4.50 (q, *J* = 7.2 Hz, 4H), 4.45 (s, 2H), 3.76 (s, 3H), 1.45 (t, *J* = 7.2 Hz, 6H); <sup>13</sup>C NMR (CDCl<sub>3</sub>, 125 MHz)  $\delta$  171.9 (2C), 163.8, 158.6 (2C), 157.9, 130.4 (2C), 129.7, 117.8, 114.1 (2C), 63.0 (2C), 55.4, 44.9, 14.3; IR (film)  $\nu_{\text{max}}$  2980, 2929, 1730, 1612, 1554, 1512, 1466, 1375, 1300, 1248, 1203, 1096, 1024, 859, 777, 722 cm<sup>-1</sup>; HRESI-TOF *m/z* 345.1448 (C<sub>18</sub>H<sub>20</sub>N<sub>2</sub>O<sub>5</sub> + H<sup>+</sup> requires 345.1445).

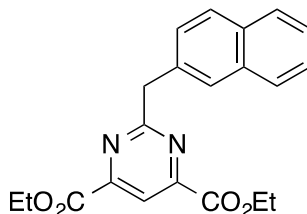

**Diethyl 2-(Naphthalen-2-yl-methyl)pyrimidine-4,6-dicarboxylate (12d).** A solution of **6** (20.0 mg, 0.09 mmol, 2.0 equiv) in CH<sub>3</sub>CN (343  $\mu$ L) stirring with crushed 4 Å molecule sieves was treated with **10d** (8.3 mg, 0.045 mmol, 1.0 equiv) at room temperature. The reaction mixture was stirred for 4 h, at which time the mixture was purified by preparative TLC (30% EtOAc/hexanes) to provide **12d** (8.3 mg, 51%): <sup>1</sup>H NMR (CDCl<sub>3</sub>, 500 MHz)  $\delta$  8.37 (s, 1H), 8.35 (s, 1H), 7.83 (d, *J* = 8.1 Hz, 1H), 7.75 (d, *J* = 8.1 Hz, 1H), 7.54–7.47 (m, 1H), 7.49–7.37 (m, 3H), 4.96 (s, 2H), 4.47 (q, *J* = 7.2 Hz, 4H), 1.42 (t, *J* = 7.1 Hz, 6H); <sup>13</sup>C NMR (CDCl<sub>3</sub>, 125 MHz)  $\delta$  171.6 (2C), 163.8, 157.8 (2C), 134.2, 134.0, 132.3, 128.7, 127.9, 127.8, 126.2, 125.74, 125.71, 124.7, 117.8, 62.9 (2C), 43.3, 14.3 (2C); IR (film)  $\nu_{\text{max}}$  2982, 2930, 1750, 1729, 1574, 1553, 1466, 1445, 1369, 1249, 1203, 1100, 1021, 795, 780, 724 cm<sup>-1</sup>; HRESI-TOF *m/z* 365.1497 (C<sub>21</sub>H<sub>20</sub>N<sub>2</sub>O<sub>4</sub> + H<sup>+</sup> requires 365.1496).



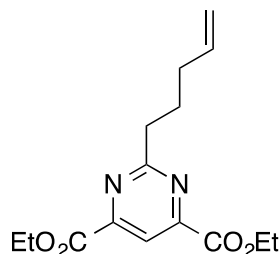

**Diethyl 2-(Pent-4-en-1-yl)pyrimidine-4,6-dicarboxylate (12e).** A solution of **6** (20.0 mg, 0.09 mmol, 2.0 equiv) in CH<sub>3</sub>CN (193 μL) stirring with crushed 4 Å molecule sieves was treated dropwise with a solution of **10e** (5.1 mg, 0.045 mmol, 1.0 equiv) in CH<sub>3</sub>CN (150 μL) at room temperature. The reaction mixture was stirred for 4 h, at which time the mixture was purified by preparative TLC (40% EtOAc/hexanes) to provide **12e** (7.2 mg, 56%): <sup>1</sup>H NMR (CDCl<sub>3</sub>, 500 MHz) δ 8.39 (s, 1H), 5.83 (ddt, *J* = 17.0, 10.1, 6.8 Hz, 1H), 5.04 (d, *J* = 17.2 Hz, 1H), 4.97 (d, *J* = 10.1 Hz, 1H), 4.52 (q, *J* = 7.2 Hz, 4H), 3.22–3.15 (m, 2H), 2.18 (q, *J* = 7.3 Hz, 2H), 2.02–1.95 (m, 2H), 1.45 (t, *J* = 7.2 Hz, 6H); <sup>13</sup>C NMR (CDCl<sub>3</sub>, 125 MHz) δ 173.4 (2C), 164.0, 157.6 (2C), 138.2, 117.6, 115.3, 63.0 (2C), 39.1, 33.6, 28.3, 14.4 (2C); IR (film) ν<sub>max</sub> 2981, 2935, 1752, 1731, 1556, 1446, 1385, 1348, 1264, 1247, 1200, 1172, 1098, 1022, 914, 722 cm<sup>-1</sup>; HRESI-TOF *m/z* 293.1502 (C<sub>15</sub>H<sub>20</sub>N<sub>2</sub>O<sub>4</sub> + H<sup>+</sup> requires 293.1496).

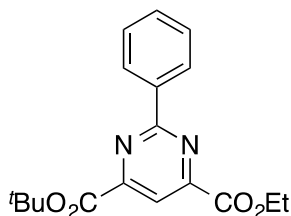

**4-(tert-Butyl) 6-Ethyl 2-Phenylpyrimidine-4,6-dicarboxylate (13a).** A solution of **7** (0.090 mmol, 22.7 mg) in anhydrous CH<sub>3</sub>CN (200 μL) at 25 °C was treated with a solution of **10a** (0.066 mmol, 8.0 mg) in anhydrous CH<sub>3</sub>CN (200 μL). The reaction mixture was stirred at 60 °C for 16 h, upon which time the mixture was cooled to 25 °C, filtered through Celite, and concentrated in vacuo. The residue was purified by flash chromatography (SiO<sub>2</sub>, 15% EtOAc/hexanes) to yield **13a** as a clear oil (12.7 mg, 49%): <sup>1</sup>H NMR (CDCl<sub>3</sub>, 500 MHz) δ 8.61–8.59 (m, 2H), 8.35 (s, 1H), 7.55–7.50 (m, 3H), 4.54 (q, *J* = 7.1 Hz, 2H), 1.68 (s, 9H), 1.49 (t, *J* = 7.1 Hz, 3H); <sup>13</sup>C NMR (CDCl<sub>3</sub>, 125 MHz) δ 166.0, 164.3, 162.8, 159.0, 157.8, 136.4, 131.8, 129.0 (2C), 128.8 (2C), 117.6, 84.0, 62.9, 28.2 (3C), 14.4; IR (neat) ν<sub>max</sub> 2981, 2930, 1746, 1727, 1555, 1458, 1377, 1279, 1256, 1216, 1187, 159, 1104, 1020, 845, 737, 694 cm<sup>-1</sup>; HRESI-TOF *m/z* 329.1497 (C<sub>18</sub>H<sub>20</sub>N<sub>2</sub>O<sub>4</sub> + H<sup>+</sup> requires 329.1496).

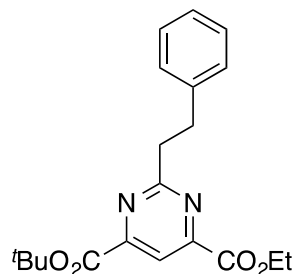

**4-(tert-Butyl) 6-Ethyl 2-Phenethylpyrimidine-4,6-dicarboxylate (13b).** A solution of **7** (0.079 mmol, 20 mg) in anhydrous CH<sub>3</sub>CN (170 μL) at 25 °C was treated with a solution of **10b** (0.04 mmol, 6.0 mg) in anhydrous CH<sub>3</sub>CN (135 μL). The reaction mixture was stirred at 25 °C for 4 h, upon which time the mixture was filtered through Celite and concentrated in vacuo. The residue was purified by flash chromatography (SiO<sub>2</sub>, 20% EtOAc/hexanes) to yield **13b** as a clear oil (12.7 mg, 89%): <sup>1</sup>H NMR (CDCl<sub>3</sub>, 600 MHz) δ 8.30 (s, 1H), 7.32–7.23 (m, 4H), 7.21–7.16 (m, 1H), 4.52 (q, *J* = 7.1 Hz, 2H), 3.54–3.45 (m, 2H), 3.27–3.17 (m, 2H), 1.65 (s, 9H), 1.46 (t, *J* = 7.1 Hz, 3H); <sup>13</sup>C NMR (CDCl<sub>3</sub>, 150 MHz) δ 172.3, 164.1, 162.6, 158.8, 157.5, 141.2, 128.7 (2C), 128.5 (2C), 126.2, 117.5, 84.1, 63.0, 41.0, 34.4, 28.1 (3C), 14.4; IR (neat) ν<sub>max</sub> 2980, 2931, 1746, 1727, 1555,

1386, 1454, 1386, 1370, 1276, 1256, 1202, 1157, 1103, 1025, 844, 756, 701  $\text{cm}^{-1}$ ; HRESI-TOF  $m/z$  357.1816 ( $\text{C}_{20}\text{H}_{24}\text{N}_2\text{O}_4 + \text{H}^+$  requires 357.1809).

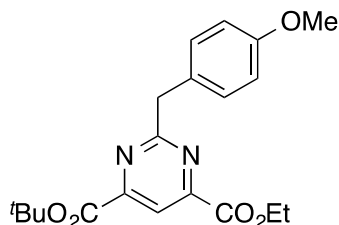

**4-(tert-Butyl) 6-Ethyl 2-(4-Methoxybenzyl)pyrimidine-4,6-dicarboxylate (13c).** A solution of **7** (20.0 mg, 0.08 mmol, 2.0 equiv) in  $\text{CH}_3\text{CN}$  (174  $\mu\text{L}$ ) stirring with crushed 4 Å molecule sieves was treated dropwise with a solution of **10c** (6.5 mg, 0.04 mmol, 1.0 equiv) in  $\text{CH}_3\text{CN}$  (133  $\mu\text{L}$ ) at room temperature. The reaction mixture was stirred for 4 h, at which time the mixture was purified by preparative TLC (40% EtOAc/hexanes) to provide **13c** (12.7 mg, 85%):  $^1\text{H}$  NMR ( $\text{CDCl}_3$ , 500 MHz)  $\delta$  8.27 (s, 1H), 7.37 (d,  $J = 8.3$  Hz, 2H), 6.82 (d,  $J = 8.4$  Hz, 2H), 4.50 (q,  $J = 7.1$  Hz, 2H), 4.43 (s, 2H), 3.76 (s, 3H), 1.63 (s, 9H), 1.44 (t,  $J = 7.2$  Hz, 3H);  $^{13}\text{C}$  NMR ( $\text{CDCl}_3$ , 125 MHz)  $\delta$  171.8, 164.1, 162.5, 159.0, 158.6, 157.7, 130.5 (2C), 129.8, 117.5, 114.0 (2C), 84.0, 62.9, 55.4, 44.9, 28.1 (3C), 14.3; IR (film)  $\nu_{\text{max}}$  2981, 2933, 1745, 1726, 1612, 1553, 1512, 1462, 1371, 1251, 1202, 1157, 1096, 1029, 844, 817, 779  $\text{cm}^{-1}$ ; HRESI-TOF  $m/z$  373.1758 ( $\text{C}_{20}\text{H}_{24}\text{N}_2\text{O}_5 + \text{H}^+$  requires 373.1758).

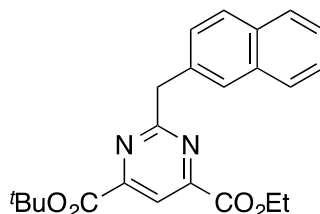

**4-(tert-Butyl) 6-Ethyl 2-(Naphthalen-2-ylmethyl)pyrimidine-4,6-dicarboxylate (13d).** A solution of **7** (30.0 mg, 0.118 mmol, 2.0 equiv) in  $\text{CH}_3\text{CN}$  (454  $\mu\text{L}$ ) stirring with crushed 4 Å molecule sieves was treated with **10d** (10.9 mg, 0.059 mmol, 1.0 equiv) at room temperature. The reaction mixture was stirred for 4 h, at which time the mixture was purified by preparative TLC (40% EtOAc/hexanes) to provide **13d** (12.5 mg, 54%):  $^1\text{H}$  NMR ( $\text{CDCl}_3$ , 500 MHz)  $\delta$  8.39 (d,  $J = 8.3$  Hz, 1H), 8.27 (s, 1H), 7.83 (d,  $J = 8.0$  Hz, 1H), 7.75 (d,  $J = 8.2$  Hz, 1H), 7.55–7.38 (m, 4H), 4.94 (s, 2H), 4.47 (q,  $J = 7.1$  Hz, 2H), 1.60 (s, 9H), 1.42 (t,  $J = 7.1$  Hz, 3H);  $^{13}\text{C}$  NMR ( $\text{CDCl}_3$ , 125 MHz)  $\delta$  171.4, 164.0, 162.6, 159.0, 157.7, 134.3, 134.0, 132.3, 128.7, 127.9, 127.7, 126.1, 125.72, 125.69, 124.9, 117.5, 83.9, 62.9, 43.3, 28.1, 14.3; IR (film)  $\nu_{\text{max}}$  2980, 2935, 1746, 1726, 1573, 1552, 1511, 1457, 1395, 1369, 1277, 1256, 1202, 1157, 1102, 1021, 845, 795, 781, 708  $\text{cm}^{-1}$ ; HRESI-TOF  $m/z$  393.1811 ( $\text{C}_{23}\text{H}_{24}\text{N}_2\text{O}_4 + \text{H}^+$  requires 393.1809).

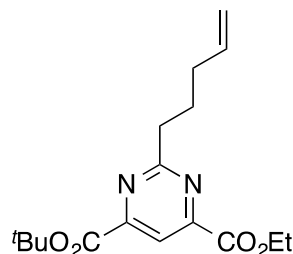

**4-(tert-Butyl) 6-Ethyl 2-(Pent-4-en-1-yl)pyrimidine-4,6-dicarboxylate (13e).** A solution of **7** (30.0 mg, 0.118 mmol, 2.0 equiv) in  $\text{CH}_3\text{CN}$  (257  $\mu\text{L}$ ) stirring with crushed 4 Å molecule sieves was treated dropwise with a solution of **10e** (6.7 mg, 0.059 mmol, 1.0 equiv) in  $\text{CH}_3\text{CN}$  (197  $\mu\text{L}$ ) at room temperature. The reaction mixture was stirred for 4 h, at which time the mixture was purified by preparative TLC (40% EtOAc/hexanes) to provide **13e** (13.6 mg, 72%):  $^1\text{H}$  NMR ( $\text{CDCl}_3$ , 500 MHz)  $\delta$  8.27 (s, 1H), 5.89–5.78 (m, 1H), 5.03 (d,  $J = 17.2$  Hz, 1H), 4.96 (dd,  $J = 10.2, 1.0$  Hz, 1H), 4.51 (q,  $J = 7.1$  Hz, 2H), 3.20–3.13 (m, 2H), 2.17 (q,  $J = 7.2$  Hz, 2H), 1.98 (p,  $J = 7.6, 7.1$  Hz, 2H), 1.64 (s, 9H), 1.45 (t,  $J = 7.2$  Hz, 3H);  $^{13}\text{C}$  NMR ( $\text{CDCl}_3$ , 125 MHz)  $\delta$  173.2, 164.2,

162.7, 158.7, 157.4, 138.3, 117.3, 115.2, 84.0, 63.0, 39.0, 33.6, 28.13 (3C), 28.08, 14.3; IR (film)  $\nu_{\max}$  2980, 2935, 1747, 1727, 1555, 1457, 1387, 1370, 1277, 1255, 1202, 1158, 1100, 1023, 913, 845, 756  $\text{cm}^{-1}$ ; HRESI-TOF  $m/z$  321.1811 ( $\text{C}_{17}\text{H}_{24}\text{N}_2\text{O}_4 + \text{H}^+$  requires 321.1809).

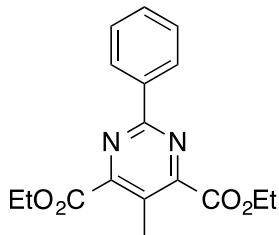

**Diethyl 5-Methyl-2-phenylpyrimidine-4,6-dicarboxylate (14a).** A solution of **8** (20.0 mg, 0.084 mmol, 2.0 equiv) in  $\text{CH}_3\text{CN}$  (182  $\mu\text{L}$ ) stirring with crushed 4 Å molecule sieves was treated dropwise with a solution of **10a** (5.0 mg, 0.042 mmol, 1.0 equiv) in  $\text{CH}_3\text{CN}$  (140  $\mu\text{L}$ ) at room temperature. The reaction mixture was stirred for 16 h, at which time the mixture was purified by preparative TLC (30% EtOAc/hexanes) to provide **14a** (2.5 mg, 19%):  $^1\text{H}$  NMR ( $\text{CDCl}_3$ , 500 MHz)  $\delta$  8.51–8.43 (m, 2H), 7.54–7.44 (m, 3H), 4.51 (q,  $J = 7.2$  Hz, 4H), 2.53 (s, 3H), 1.46 (t,  $J = 7.1$  Hz, 6H);  $^{13}\text{C}$  NMR ( $\text{CDCl}_3$ , 150 MHz)  $\delta$  165.5 (2C), 162.4, 159.0 (2C), 136.3, 131.3, 128.7 (2C), 128.6 (2C), 124.5, 62.6 (2C), 14.4 (3C); IR (film)  $\nu_{\max}$  2925, 2853, 1739, 1557, 1398, 1378, 1291, 1245, 1180, 1044  $\text{cm}^{-1}$ ; HRESI-TOF  $m/z$  315.1340 ( $\text{C}_{17}\text{H}_{18}\text{N}_2\text{O}_4 + \text{H}^+$  requires 315.1339).

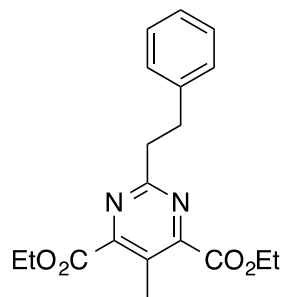

**Diethyl 5-Methyl-2-(2-phenylethyl)pyrimidine-4,6-dicarboxylate (14b).** A solution of **8** (20.0 mg, 0.084 mmol, 2.0 equiv) in  $\text{CH}_3\text{CN}$  (182  $\mu\text{L}$ ) stirring with crushed 4 Å molecule sieves was treated dropwise with a solution of **10b** (6.2 mg, 0.042 mmol, 1.0 equiv) in  $\text{CH}_3\text{CN}$  (140  $\mu\text{L}$ ) at room temperature. The reaction mixture was stirred for 16 h, at which time the mixture was purified by preparative TLC (30% EtOAc/hexanes) to provide **14b** (2.8 mg, 20%):  $^1\text{H}$  NMR ( $\text{CDCl}_3$ , 500 MHz)  $\delta$  7.34–7.21 (m, 4H), 7.23–7.15 (m, 1H), 4.49 (q,  $J = 7.2$  Hz, 4H), 3.34 (dd,  $J = 9.9, 6.5$  Hz, 2H), 3.16 (dd,  $J = 9.9, 6.6$  Hz, 2H), 2.47 (s, 3H), 1.44 (t,  $J = 7.1$  Hz, 6H);  $^{13}\text{C}$  NMR ( $\text{CDCl}_3$ , 150 MHz)  $\delta$  168.2 (2C), 165.3, 158.7 (2C), 141.3, 128.7 (2C), 128.5 (2C), 126.2, 124.1, 62.7 (2C), 40.5, 34.4, 14.32 (2C), 14.29; IR (film)  $\nu_{\max}$  2921, 2857, 1739, 1556, 1401, 1245, 1134, 1044, 703  $\text{cm}^{-1}$ ; HRESI-TOF  $m/z$  343.1654 ( $\text{C}_{19}\text{H}_{22}\text{N}_2\text{O}_4 + \text{H}^+$  requires 343.1652).

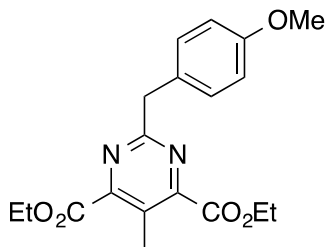

**Diethyl 2-(4-Methoxybenzyl)-5-methylpyrimidine-4,6-dicarboxylate (14c).** A solution of **8** (20.0 mg, 0.084 mmol, 2.0 equiv) in  $\text{CH}_3\text{CN}$  (182  $\mu\text{L}$ ) stirring with crushed 4 Å molecule sieves was treated dropwise with a solution of **10c** (6.9 mg, 0.042 mmol, 1.0 equiv) in  $\text{CH}_3\text{CN}$  (140  $\mu\text{L}$ ) at room temperature. The reaction mixture was stirred for 16 h, at which time the mixture was purified by preparative TLC (30% EtOAc/hexanes) to provide **14c** (3.8 mg, 25%):  $^1\text{H}$  NMR ( $\text{CDCl}_3$ , 500 MHz)  $\delta$  7.29 (d,  $J = 8.5$  Hz, 2H), 6.82 (d,  $J = 8.6$  Hz, 2H), 4.46 (q,  $J = 7.2$  Hz, 4H), 4.28 (s, 2H), 3.77 (s, 3H), 2.44 (s, 3H), 1.42 (t,  $J = 7.1$  Hz, 6H);  $^{13}\text{C}$  NMR ( $\text{CDCl}_3$ , 125 MHz)  $\delta$  167.8 (2C), 165.3, 161.9, 159.0 (2C), 158.6, 130.3 (2C), 114.0 (2C), 99.8, 62.6 (2C), 55.4, 44.4, 14.3

(2), 14.2; IR (film)  $\nu_{\max}$  2925, 2854, 1738, 1612, 1556, 1512, 1445, 1397, 1299, 1246, 1137, 1089, 1042, 859, 801  $\text{cm}^{-1}$ ; HRESI-TOF  $m/z$  359.1601 ( $\text{C}_{19}\text{H}_{22}\text{N}_2\text{O}_5 + \text{H}^+$  requires 359.1601).

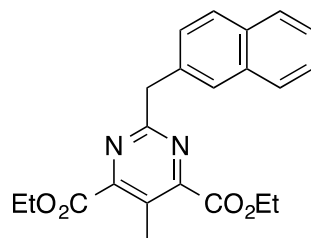

**Diethyl 5-Methyl-2-(naphthalen-2-ylmethyl)pyrimidine-4,6-dicarboxylate (14d).** A solution of **8** (20.0 mg, 0.084 mmol, 2.0 equiv) in  $\text{CH}_3\text{CN}$  (182  $\mu\text{L}$ ) stirring with crushed 4 Å molecule sieves was treated dropwise with a solution of **10d** (7.7 mg, 0.042 mmol, 1.0 equiv) in  $\text{CH}_3\text{CN}$  (140  $\mu\text{L}$ ) at room temperature. The reaction mixture was stirred for 16 h, at which time the mixture was purified by preparative TLC (30% EtOAc/hexanes) to provide **14d** (3.5 mg, 22%):  $^1\text{H}$  NMR ( $\text{CDCl}_3$ , 500 MHz)  $\delta$  8.31 (d,  $J = 8.3$  Hz, 1H), 7.83 (d,  $J = 8.1$  Hz, 1H), 7.77–7.71 (m, 1H), 7.54–7.42 (m, 2H), 7.43–7.37 (m, 2H), 4.80 (s, 2H), 4.44 (q,  $J = 7.1$  Hz, 4H), 2.44 (s, 3H), 1.39 (t,  $J = 7.2$  Hz, 6H);  $^{13}\text{C}$  NMR ( $\text{CDCl}_3$ , 125 MHz)  $\delta$  167.4 (2C), 165.2, 158.8 (2C), 134.3, 134.0, 132.3, 128.6, 127.7, 127.6, 126.1, 125.7 (2C), 124.8, 124.4, 62.5 (2C), 42.8, 14.3 (2C), 14.2; IR (film)  $\nu_{\max}$  2982, 2933, 1737, 1555, 1445, 1397, 1297, 1243, 1136, 1095, 1043, 1019, 793, 713  $\text{cm}^{-1}$ ; HRESI-TOF  $m/z$  379.1653 ( $\text{C}_{22}\text{H}_{22}\text{N}_2\text{O}_4 + \text{H}^+$  requires 379.1652).

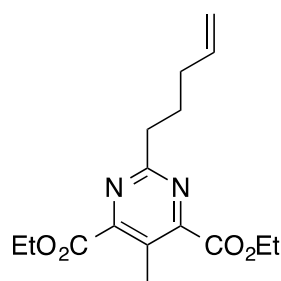

**Diethyl 5-Methyl-2-(pent-4-en-1-yl)pyrimidine-4,6-dicarboxylate (14e).** A solution of **8** (20.0 mg, 0.084 mmol, 2.0 equiv) in  $\text{CH}_3\text{CN}$  (182  $\mu\text{L}$ ) stirring with crushed 4 Å molecule sieves was treated dropwise with a solution of **10e** (4.7 mg, 0.042 mmol, 1.0 equiv) in  $\text{CH}_3\text{CN}$  (140  $\mu\text{L}$ ) at room temperature. The reaction mixture was stirred for 16 h, at which time the mixture was purified by preparative TLC (30% EtOAc/hexanes) to provide **14e** (3.2 mg, 25%);  $^1\text{H}$  NMR ( $\text{CDCl}_3$ , 500 MHz)  $\delta$  5.89–5.78 (m, 1H), 5.03 (d,  $J = 17.0$  Hz, 1H), 4.97 (d,  $J = 10.2$  Hz, 1H), 4.48 (q,  $J = 7.3$  Hz, 4H), 3.06–2.98 (m, 2H), 2.46 (s, 3H), 2.15 (q,  $J = 7.2$  Hz, 2H), 1.93 (p,  $J = 7.7$  Hz, 2H), 1.43 (t,  $J = 7.1$  Hz, 6H);  $^{13}\text{C}$  NMR ( $\text{CDCl}_3$ , 150 MHz)  $\delta$  169.1 (2C), 165.4, 158.7 (2C), 138.3, 123.9, 115.2, 62.6 (2C), 38.4, 33.6, 28.0, 14.30 (2C), 14.25; IR (film)  $\nu_{\max}$  2982, 2930, 2872, 1739, 1558, 1447, 1407, 1379, 1243, 1165, 1135, 1097, 1044, 913, 862, 717  $\text{cm}^{-1}$ ; HRESI-TOF  $m/z$  307.1654 ( $\text{C}_{16}\text{H}_{22}\text{N}_2\text{O}_4 + \text{H}^+$  requires 307.1652).

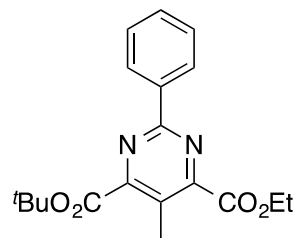

**4-(tert-Butyl) 6-Ethyl 5-Methyl-2-phenylpyrimidine-4,6-dicarboxylate (15a).** A solution of **9** (0.094 mmol, 25 mg) in anhydrous  $\text{CH}_3\text{CN}$  (200  $\mu\text{L}$ ) at 25 °C was treated with a solution of **10a** (0.062 mmol, 7.5 mg) in anhydrous  $\text{CH}_3\text{CN}$  (200  $\mu\text{L}$ ). The reaction mixture was stirred at 60 °C for 16 h, upon which time the mixture was cooled to 25 °C, filtered through Celite, and concentrated in vacuo. The residue was purified by flash chromatography ( $\text{SiO}_2$ , 10% EtOAc/hexanes) to yield **15a** as a clear oil (13.2 mg, 62%):  $^1\text{H}$  NMR ( $\text{CDCl}_3$ , 400

MHz)  $\delta$  8.54–8.39 (m, 2H), 7.54–7.39 (m, 3H), 4.50 (q,  $J = 7.1$  Hz, 2H), 2.49 (s, 3H), 1.66 (s, 9H), 1.46 (t,  $J = 7.1$  Hz, 3H);  $^{13}\text{C}$  NMR ( $\text{CDCl}_3$ , 125 MHz)  $\delta$  165.5, 164.8, 162.4, 160.5, 158.4, 136.4, 131.2, 128.64 (2C), 128.59 (2C), 123.5, 84.3, 62.5, 28.3 (3C), 14.4, 14.3; IR (neat)  $\nu_{\text{max}}$  2981, 2930, 1736, 1555, 1454, 1397, 1373, 1292, 1254, 1161, 1134, 1095, 1044, 846, 748, 721, 695  $\text{cm}^{-1}$ ; HRESI-TOF  $m/z$  343.1658 ( $\text{C}_{19}\text{H}_{22}\text{N}_2\text{O}_4 + \text{H}^+$  requires 343.1652).

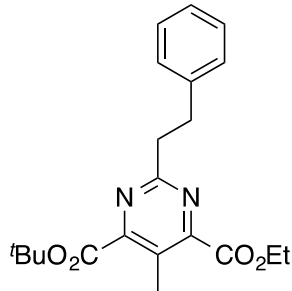

**4-(tert-Butyl) 6-Ethyl 5-Methyl-2-phenethylpyrimidine-4,6-dicarboxylate (15b).** A solution of **9** (0.075 mmol, 20 mg) in anhydrous  $\text{CH}_3\text{CN}$  (160  $\mu\text{L}$ ) at 25  $^\circ\text{C}$  was treated with a solution of free-based 3-phenylpropanimidamide (0.037 mmol, 5.5 mg) in anhydrous  $\text{CH}_3\text{CN}$  (125  $\mu\text{L}$ ). The reaction mixture was stirred at 25  $^\circ\text{C}$  for 16 h, upon which time the mixture was filtered through Celite and concentrated in vacuo. The residue was purified by flash chromatography ( $\text{SiO}_2$ , 10% EtOAc/hexanes) to yield **15b** as a clear oil (9.0 mg, 66%):  $^1\text{H}$  NMR ( $\text{CDCl}_3$ , 600 MHz)  $\delta$  7.31–7.23 (m, 4H), 7.20–7.17 (m, 1H), 4.48 (q,  $J = 7.1$  Hz, 2H), 3.36–3.29 (m, 2H), 3.19–3.12 (m, 2H), 2.44 (s, 3H), 1.64 (s, 9H), 1.43 (t,  $J = 7.1$  Hz, 3H);  $^{13}\text{C}$  NMR ( $\text{CDCl}_3$ , 150 MHz)  $\delta$  168.1, 165.4, 164.7, 160.3, 158.1, 141.4, 128.7 (2C), 128.5 (2C), 126.1, 123.0, 84.4, 62.6, 40.4, 34.4, 28.3 (3C), 14.3, 14.2; IR (neat)  $\nu_{\text{max}}$  2977, 2927, 1736, 1556, 1453, 1406, 1370, 1253, 1224, 1163, 1135, 1045, 845, 751, 700  $\text{cm}^{-1}$ ; HRESI-TOF  $m/z$  371.1963 ( $\text{C}_{21}\text{H}_{26}\text{N}_2\text{O}_4 + \text{H}^+$  requires 371.1965).

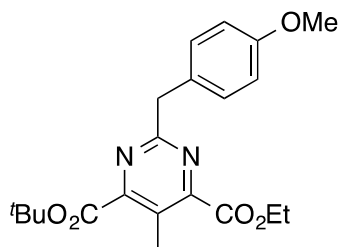

**4-(tert-Butyl) 6-Ethyl 2-(4-Methoxybenzyl)-5-methylpyrimidine-4,6-dicarboxylate (15c).** A solution of **9** (30.0 mg, 0.112 mmol, 2.0 equiv) in  $\text{CH}_3\text{CN}$  (244  $\mu\text{L}$ ) stirring with crushed 4  $\text{\AA}$  molecule sieves was treated dropwise with a solution of **10c** (9.2 mg, 0.056 mmol, 1.0 equiv) in  $\text{CH}_3\text{CN}$  (187  $\mu\text{L}$ ) at room temperature. The reaction mixture was stirred for 16 h, at which time the mixture was purified by preparative TLC (30% EtOAc/hexanes) to provide **15c** (10.7 mg, 50%):  $^1\text{H}$  NMR ( $\text{CDCl}_3$ , 500 MHz)  $\delta$  7.31 (d,  $J = 8.6$  Hz, 2H), 6.81 (d,  $J = 8.7$  Hz, 2H), 4.45 (q,  $J = 7.1$  Hz, 2H), 4.26 (s, 2H), 3.77 (s, 3H), 2.41 (s, 3H), 1.62 (s, 9H), 1.41 (t,  $J = 7.1$  Hz, 3H);  $^{13}\text{C}$  NMR ( $\text{CDCl}_3$ , 125 MHz)  $\delta$  167.7, 165.3, 164.6, 160.4, 158.5, 158.4, 130.3 (2C), 130.1, 123.1, 113.9 (2C), 84.3, 62.5, 55.4, 44.3, 28.3 (3C), 14.3, 14.1; IR (film)  $\nu_{\text{max}}$  2979, 2932, 1734, 1555, 1512, 1460, 1396, 1371, 1299, 1249, 1163, 1037, 844, 800  $\text{cm}^{-1}$ ; HRESI-TOF  $m/z$  387.1916 ( $\text{C}_{21}\text{H}_{26}\text{N}_2\text{O}_5 + \text{H}^+$  requires 387.1914).

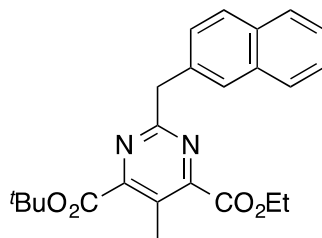

**4-(tert-Butyl) 6-Ethyl 5-Methyl-2-(naphthalen-2-yl-methyl)pyrimidine-4,6-dicarboxylate (15d).** A solution of **9** (30.0 mg, 0.112 mmol, 2.0 equiv) in  $\text{CH}_3\text{CN}$  (431  $\mu\text{L}$ ) stirring with crushed 4  $\text{\AA}$  molecule sieves was treated with **10d** (10.3 mg, 0.056 mmol, 1.0 equiv) at room temperature. The reaction mixture was stirred for

16 h, at which time the mixture was purified by preparative TLC (30% EtOAc/hexanes) to provide **15d** (11.2 mg, 49%):  $^1\text{H NMR}$  ( $\text{CDCl}_3$ , 500 MHz)  $\delta$  8.34 (d,  $J = 8.5$  Hz, 1H), 7.85–7.81 (m, 1H), 7.76–7.71 (m, 1H), 7.52–7.37 (m, 4H), 4.78 (s, 2H), 4.43 (q,  $J = 7.1$  Hz, 2H), 2.41 (s, 3H), 1.59 (s, 9H), 1.39 (t,  $J = 7.2$  Hz, 3H);  $^{13}\text{C NMR}$  ( $\text{CDCl}_3$ , 125 MHz)  $\delta$  167.3, 165.3, 164.6, 160.2, 158.3, 134.4, 134.0, 132.4, 128.6, 127.7, 127.6, 126.0, 125.7, 125.6, 124.9, 123.3, 84.2, 62.4, 42.7, 28.2 (3C), 14.3, 14.1; IR (film)  $\nu_{\text{max}}$  2981, 2930, 1734, 1555, 1452, 1395, 1371, 1297, 1223, 1161, 1135, 1045, 846, 791  $\text{cm}^{-1}$ ; HRESI-TOF  $m/z$  407.1967 ( $\text{C}_{24}\text{H}_{26}\text{N}_2\text{O}_4 + \text{H}^+$  requires 407.1965).

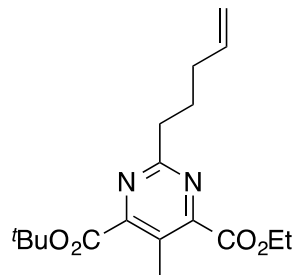

**4-(tert-Butyl) 6-Ethyl 5-Methyl-2-(pent-4-en-1-yl)pyrimidine-4,6-dicarboxylate (15e).** A solution of **9** (30.0 mg, 0.112 mmol, 2.0 equiv) in  $\text{CH}_3\text{CN}$  (244  $\mu\text{L}$ ) stirring with crushed 4 Å molecule sieves was treated dropwise with a solution of **10e** (6.3 mg, 0.056 mmol, 1.0 equiv) in  $\text{CH}_3\text{CN}$  (187  $\mu\text{L}$ ) at room temperature. The reaction mixture was stirred for 16 h, at which time the mixture was purified by preparative TLC (30% EtOAc/hexanes) to provide **15e** (6.7 mg, 36%):  $^1\text{H NMR}$  ( $\text{CDCl}_3$ , 500 MHz)  $\delta$  5.83 (ddt,  $J = 17.0, 10.2, 6.7$  Hz, 1H), 5.03 (dd,  $J = 17.1, 1.8$  Hz, 1H), 4.99–4.94 (m, 1H), 4.47 (q,  $J = 7.1$  Hz, 2H), 3.03–2.97 (m, 2H), 2.42 (s, 3H), 2.20–2.10 (m, 2H), 1.98–1.88 (m, 2H), 1.63 (s, 9H), 1.42 (t,  $J = 7.1$  Hz, 3H);  $^{13}\text{C NMR}$  ( $\text{CDCl}_3$ , 125 MHz)  $\delta$  169.0, 165.5, 164.8, 160.3, 158.1, 138.4, 122.7, 115.1, 84.4, 62.5, 38.4, 33.6, 28.3 (3C), 28.0, 14.3, 14.1; IR (film)  $\nu_{\text{max}}$  2979, 2930, 1736, 1557, 1407, 1252, 1224, 1159, 1135, 1044  $\text{cm}^{-1}$ ; HRESI-TOF  $m/z$  335.1966 ( $\text{C}_{18}\text{H}_{26}\text{N}_2\text{O}_4 + \text{H}^+$  requires 335.1965).

### III. Reaction of 1,2,3-Triazines with Enamines

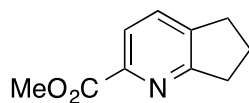

**Methyl 6,7-Dihydro-5H-cyclopenta[b]pyridine-2-carboxylate (17a).** Pyrrolidino-1-cyclopentene (**16a**, 19  $\mu\text{L}$ , 0.13 mmol, 1.2 equiv) was added to a stirred solution of **5** (15.8 mg, 0.11 mmol) and 4 Å molecular sieves (16 mg) in  $\text{CHCl}_3$  (1.1 mL) at room temperature. The reaction mixture turned from yellow to red with the addition of the dienophile and rapid  $\text{N}_2$  evolution was observed. After 15 min, the reaction mixture was warmed to 60 °C and stirred for 30 min at 60 °C. The reaction mixture was evaporated under vacuum and the residue was purified by flash chromatography ( $\text{SiO}_2$ , 40% EtOAc/hexanes) to provide **17a** (13.6 mg, 68%) as a yellow oil:  $^1\text{H}$  NMR ( $\text{CDCl}_3$ , 400 MHz)  $\delta$  7.91 (d,  $J = 8.0$  Hz, 1H), 7.61 (d,  $J = 8.0$  Hz, 1H), 3.98 (s, 3H), 3.10 (t,  $J = 8.0$  Hz, 2H), 2.99 (t,  $J = 7.6$  Hz, 2H), 2.17 (q,  $J = 7.6$  Hz, 2H);  $^{13}\text{C}$  NMR ( $\text{CDCl}_3$ , 100 MHz)  $\delta$  166.5, 166.2, 146.0, 141.6, 132.4, 123.2, 52.7, 34.2, 30.8, 23.2; IR  $\nu_{\text{max}}$  2949, 1708, 1441, 1426, 1335, 1285, 1191, 1163, 1119, 970, 860, 783  $\text{cm}^{-1}$ ; HRESI-TOF  $m/z$  200.0685 ( $\text{C}_{10}\text{H}_{11}\text{NO}_2 + \text{Na}^+$  requires 200.0683).

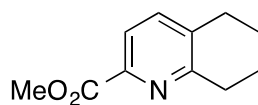

**Methyl 5,6,7,8-Tetrahydroquinoline-2-carboxylate (17b).** 1-Pyrrolidino-1-cyclohexene (**16b**, 43  $\mu\text{L}$ , 0.26 mmol, 1.2 equiv) was added to a stirred solution of **5** (30 mg, 0.21 mmol) and 4 Å molecular sieves (30 mg) in  $\text{CHCl}_3$  (2.1 mL) at room temperature. The reaction mixture turned from yellow to red with the addition of the dienophile and rapid  $\text{N}_2$  evolution was observed. After 15 min, the reaction mixture was warmed to 60 °C and stirred for 2 h at 60 °C. The reaction mixture was evaporated under vacuum and the residue was purified by flash chromatography ( $\text{SiO}_2$ , 40% EtOAc/hexanes) to provide **17b** (21.8 mg, 53%) as a yellow oil:  $^1\text{H}$  NMR ( $\text{CDCl}_3$ , 400 MHz)  $\delta$  7.87 (d,  $J = 8.0$  Hz, 1H), 7.48 (d,  $J = 8.0$  Hz, 1H), 3.98 (s, 3H), 3.02 (t,  $J = 6.4$  Hz, 2H), 2.84 (t,  $J = 6.4$  Hz, 2H), 1.91-1.93 (m, 2H), 1.82-1.85 (m, 2H);  $^{13}\text{C}$  NMR ( $\text{CDCl}_3$ , 100 MHz)  $\delta$  166.1, 158.0, 145.0, 137.5, 136.8, 122.5, 52.8, 32.7, 29.0, 22.8, 22.3; IR  $\nu_{\text{max}}$  2940, 1738, 1434, 1426, 1365, 1268, 1197, 1163, 1133  $\text{cm}^{-1}$ ; HRESI-TOF  $m/z$  192.1017 ( $\text{C}_{11}\text{H}_{13}\text{NO}_2 + \text{H}^+$  requires 192.1019).

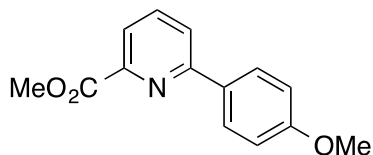

**Methyl 6-(4-Methoxyphenyl)picolinate (17c).** 1-(1-(4-methoxyphenyl)vinyl)pyrrolidine (**16c**,<sup>9</sup> 24 mg, 0.12 mmol, 1.2 equiv) was added to a stirred solution of **5** (14 mg, 0.10 mmol) and 4 Å molecular sieves (15 mg) in  $\text{CHCl}_3$  (1.0 mL) at room temperature. The reaction mixture turned from yellow to red with the addition of the dienophile. After 30 min, the reaction mixture was warmed to 60 °C and stirred for 8 h at 60 °C. The reaction mixture was evaporated under vacuum and the residue was purified by flash chromatography ( $\text{SiO}_2$ , 10% EtOAc/hexanes) to provide **17c** (10.2 mg, 53%) as a yellow oil:  $^1\text{H}$  NMR ( $\text{CDCl}_3$ , 400 MHz)  $\delta$  8.02 (d,  $J = 8.8$  Hz, 2H), 7.99 (d,  $J = 8.0$  Hz, 1H), 7.85 (d,  $J = 3.2$  Hz, 1H), 7.84 (d,  $J = 8.0$  Hz, 1H), 7.00 (d,  $J = 8.8$  Hz, 2H), 4.02 (s, 3H), 3.98 (s, 3H);  $^{13}\text{C}$  NMR ( $\text{CDCl}_3$ , 100 MHz)  $\delta$  166.1, 160.8, 157.4, 147.9, 137.5, 131.1, 128.5, 122.9, 122.6, 114.2, 55.3, 52.8; IR  $\nu_{\text{max}}$  2946, 1731, 1608, 1452, 1386, 1214, 1077, 1046, 1018  $\text{cm}^{-1}$ ; HRESI-TOF  $m/z$  244.0970 ( $\text{C}_{14}\text{H}_{13}\text{NO}_3 + \text{H}^+$  requires 244.0968).

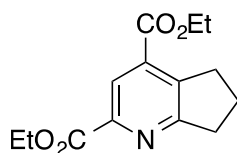

**Diethyl 6,7-Dihydro-5H-cyclopenta[*b*]pyridine-2,4-dicarboxylate (18a).** 1-Pyrrolidino-1-cyclopentene (**16a**, 30  $\mu$ L, 0.20 mmol, 1.2 equiv) was added to a stirred solution of **6** (39 mg, 0.17 mmol) and 4 Å molecular sieves (39 mg) in  $\text{CHCl}_3$  (1.7 mL) at room temperature. The reaction mixture turned from yellow to red with the addition of the dienophile and rapid  $\text{N}_2$  evolution was observed. After 15 min, the reaction mixture was warmed to 60 °C and stirred for 4 h at 60 °C. The reaction mixture was evaporated under vacuum and the residue was purified by flash chromatography ( $\text{SiO}_2$ , 40% EtOAc/hexanes) to provide **18a** (23.6 mg, 52%) as a yellow oil:  $^1\text{H}$  NMR ( $\text{CDCl}_3$ , 400 MHz)  $\delta$  8.41 (s, 1H), 4.49 (q,  $J = 7.2$  Hz, 2H), 4.42 (q,  $J = 7.2$  Hz, 2H), 3.35 (t,  $J = 7.6$  Hz, 2H), 3.16 (t,  $J = 7.6$  Hz, 2H), 2.21–2.17 (m, 2H), 1.46–1.41 (m, 6H);  $^{13}\text{C}$  NMR ( $\text{CDCl}_3$ , 100 MHz)  $\delta$  169.5, 165.7, 156.5, 147.7, 142.8, 123.1, 100.0, 62.4, 62.2, 34.6, 32.3, 31.3, 14.8, 14.7; IR  $\nu_{\text{max}}$  2977, 1724, 1441, 1369, 1201, 1177, 1096, 1026  $\text{cm}^{-1}$ ; HRESI-TOF  $m/z$  264.1227 ( $\text{C}_{14}\text{H}_{15}\text{NO}_4 + \text{H}^+$  requires 264.1230).

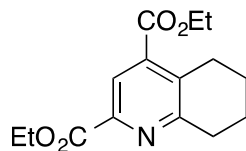

**Diethyl 5,6,7,8-Tetrahydroquinoline-2,4-dicarboxylate (18b).** 1-Pyrrolidino-1-cyclopentene (**16b**, 31  $\mu$ L, 0.19 mmol, 1.0 equiv) was added to a stirred solution of **6** (42 mg, 0.19 mmol) and 4 Å molecular sieves (42 mg) in  $\text{CHCl}_3$  (1.9 mL) at room temperature. The reaction mixture turned from yellow to red with the addition of the dienophile. After 1 h, the reaction mixture was treated with *m*-CPBA (68 mg, 0.28 mmol, 1.5 equiv) and stirred for 2 h at room temperature. The reaction mixture was evaporated under vacuum and the residue was purified by flash chromatography ( $\text{SiO}_2$ , 40% EtOAc/hexanes) to provide **18b** (21.8 mg, 41%) as a yellow oil:  $^1\text{H}$  NMR ( $\text{CDCl}_3$ , 400 MHz)  $\delta$  8.22 (s, 1H), 4.48 (q,  $J = 7.2$  Hz, 2H), 4.40 (q,  $J = 7.2$  Hz, 2H), 3.08–3.12 (m, 4H), 1.88–1.94 (m, 2H), 1.80–1.86 (m, 2H), 1.40–1.46 (m, 6H);  $^{13}\text{C}$  NMR ( $\text{CDCl}_3$ , 100 MHz)  $\delta$  166.0, 165.0, 160.0, 145.4, 138.6, 136.3, 122.3, 62.0, 61.8, 33.6, 27.3, 22.2, 14.3, 14.2; IR  $\nu_{\text{max}}$  2938, 1730, 1447, 1373, 1234, 1096, 1042, 1018  $\text{cm}^{-1}$ ; HRESI-TOF  $m/z$  278.1390 ( $\text{C}_{14}\text{H}_{19}\text{NO}_4 + \text{H}^+$  requires 278.1387).

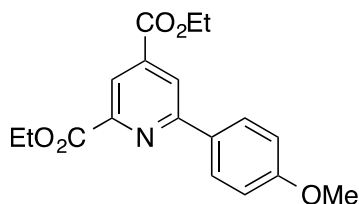

**Diethyl 6-(4-Methoxyphenyl)pyridine-2,4-dicarboxylate (18c).** 1-(1-(4-methoxyphenyl)vinyl)pyrrolidine (**16c**,<sup>9</sup> 29 mg, 0.14 mmol, 1.0 equiv) was added to a stirred solution of **6** (33 mg, 0.14 mmol) and 4 Å molecular sieves (33 mg) in  $\text{CHCl}_3$  (1.4 mL) at room temperature. The reaction mixture turned from yellow to red with the addition of the dienophile. After 30 min, the reaction mixture was warmed to 60 °C and stirred for 12 h at 60 °C. The reaction mixture was evaporated under vacuum and the residue was purified by flash chromatography ( $\text{SiO}_2$ , 10% EtOAc/hexanes) to provide **18c** (6.9 mg, 15%) as a yellow oil:  $^1\text{H}$  NMR ( $\text{CDCl}_3$ , 400 MHz)  $\delta$  8.46 (s, 1H), 8.40 (s, 1H), 8.10 (d,  $J = 8.8$  Hz, 2H), 7.01 (d,  $J = 8.8$  Hz, 2H),  $\delta$  4.49 (q,  $J = 7.2$  Hz, 2H), 4.44 (q,  $J = 7.2$  Hz, 2H), 3.87 (s, 3H), 1.42–1.48 (m, 6H);  $^{13}\text{C}$  NMR ( $\text{CDCl}_3$ , 100 MHz)  $\delta$  165.0, 164.8, 161.2, 158.3, 149.2, 139.7, 130.3, 128.7, 121.9, 121.6, 114.3, 62.2, 62.1, 55.4, 14.3, 14.2; IR  $\nu_{\text{max}}$  2937, 1740, 1611, 1429, 1362, 1234, 1083, 1018  $\text{cm}^{-1}$ ; HRESI-TOF  $m/z$  330.1441 ( $\text{C}_{18}\text{H}_{19}\text{NO}_5 + \text{H}^+$  requires 330.1336).



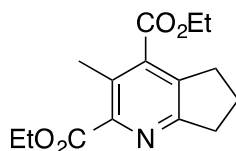

**Diethyl 3-Methyl-6,7-dihydro-5H-cyclopenta[*b*]pyridine-2,4-dicarboxylate (19a).** Pyrrolidino-1-cyclopentene (**16a**, 47  $\mu$ L, 0.30 mmol, 1.2 equiv) was added to a stirred solution of **8** (60 mg, 0.25 mmol) and 4 Å molecular sieves (60 mg) in  $\text{CHCl}_3$  (2.5 mL) at room temperature. The reaction mixture turned from yellow to red with the addition of the dienophile. After 45 min, the reaction mixture was cooled to 0 °C and treated with *m*-CPBA (93 mg, 0.37 mmol, 1.5 equiv) and stirred for 1 h at 0 °C. The reaction mixture was evaporated under vacuum and the residue was purified by flash chromatography ( $\text{SiO}_2$ , 20% EtOAc/hexanes) to provide **19a** (53 mg, 78%) as a yellow oil:  $^1\text{H}$  NMR ( $\text{CDCl}_3$ , 400 MHz)  $\delta$  4.43 (q,  $J = 7.2$  Hz, 2H), 4.39 (q,  $J = 7.2$  Hz, 2H), 3.05 (t,  $J = 7.6$  Hz, 2H), 2.99 (t,  $J = 7.6$  Hz, 2H), 2.46 (s, 3H), 2.11–2.15 (m, 2H), 1.36–1.41 (m, 6H);  $^{13}\text{C}$  NMR ( $\text{CDCl}_3$ , 100 MHz)  $\delta$  166.9, 166.7, 164.0, 148.1, 138.4, 137.4, 128.0, 61.8, 61.6, 33.9, 30.4, 22.9, 14.8, 16.0, 14.2; IR  $\nu_{\text{max}}$  2977, 1721, 1423, 1294, 1254, 1096, 1041, 1026  $\text{cm}^{-1}$ ; HRESI-TOF  $m/z$  278.1396 ( $\text{C}_{15}\text{H}_{19}\text{NO}_4 + \text{H}^+$  requires 278.1387).

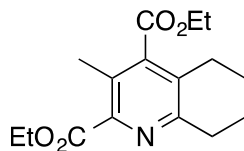

**Diethyl 3-Methyl-5,6,7,8-tetrahydroquinoline-2,4-dicarboxylate (19b).** Pyrrolidino-1-cyclohexene (**16b**, 56  $\mu$ L, 0.36 mmol, 1.2 equiv) was added to a stirred solution of **8** (72 mg, 0.30 mmol) and 4 Å molecular sieves (72 mg) in  $\text{CHCl}_3$  (3.0 mL) at room temperature. The reaction mixture turned from yellow to red with the addition of the dienophile. After 4 h, the reaction mixture was cooled to 0 °C and treated with *m*-CPBA (100 mg, 0.45 mmol, 1.5 equiv) and stirred for 1 h at 0 °C. The reaction mixture was evaporated under vacuum and the residue was purified by flash chromatography ( $\text{SiO}_2$ , 20% EtOAc/hexanes) to provide **19b** (51 mg, 58%) as a yellow oil:  $^1\text{H}$  NMR ( $\text{CDCl}_3$ , 400 MHz)  $\delta$  4.44 (q,  $J = 7.2$  Hz, 2H), 4.39 (q,  $J = 7.2$  Hz, 2H), 2.96 (t,  $J = 6.4$  Hz, 2H), 2.71 (t,  $J = 6.4$  Hz, 2H), 2.37 (s, 3H), 1.80–1.88 (m, 4H), 1.36–1.41 (m, 6H);  $^{13}\text{C}$  NMR ( $\text{CDCl}_3$ , 100 MHz)  $\delta$  167.7, 166.5, 155.4, 146.5, 143.5, 130.4, 126.4, 61.7, 61.6, 32.5, 26.1, 22.5, 22.1, 15.7, 14.2; IR  $\nu_{\text{max}}$  2938, 1730, 1447, 1373, 1234, 1096, 1042, 1018  $\text{cm}^{-1}$ ; HRESI-TOF  $m/z$  292.1558 ( $\text{C}_{16}\text{H}_{21}\text{NO}_4 + \text{H}^+$  requires 292.1549).

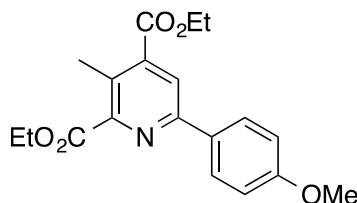

**Diethyl 6-(4-Methoxyphenyl)-3-methylpyridine-2,4-dicarboxylate (19c).** 1-(1-(4-Methoxyphenyl)vinyl)pyrrolidine (**16c**,<sup>9</sup> 97 mg, 0.48 mmol, 1.2 equiv) was added to a stirred solution of **8** (92 mg, 0.40 mmol) and 4 Å molecular sieves (92 mg) in  $\text{CHCl}_3$  (4.0 mL) at room temperature. After 2 h, the reaction mixture was cooled to 0 °C and treated with *m*-CPBA (133 mg, 0.60 mmol, 1.5 equiv) and stirred for 1 h at 0 °C. The reaction mixture was evaporated under vacuum and the residue was purified by flash chromatography ( $\text{SiO}_2$ , 10% EtOAc/hexanes) to provide **19c** (80.7 mg, 58%) as a yellow oil:  $^1\text{H}$  NMR ( $\text{CDCl}_3$ , 400 MHz)  $\delta$  8.04 (s, 1H), 7.98 (d,  $J = 8.8$  Hz, 2H), 6.98 (d,  $J = 8.8$  Hz, 2H),  $\delta$  4.46 (q,  $J = 7.2$  Hz, 2H), 4.40 (q,  $J = 7.2$  Hz, 2H), 3.85 (s, 3H), 2.59 (s, 3H), 1.40–1.46 (m, 6H);  $^{13}\text{C}$  NMR ( $\text{CDCl}_3$ , 100 MHz)  $\delta$  167.1, 166.4, 160.8, 154.7, 151.9, 140.5, 130.3, 128.5, 128.2, 120.5, 114.1, 61.9, 61.8, 55.3, 15.8, 14.2; IR  $\nu_{\text{max}}$  2980, 1726, 1608, 1440, 1372, 1234, 1077, 1042, 1018  $\text{cm}^{-1}$ ; HRESI-TOF  $m/z$  344.1498 ( $\text{C}_{19}\text{H}_{21}\text{NO}_5 + \text{H}^+$  requires 344.1495).

#### IV. Reaction of 1,2,3-Triazines with Ynamines

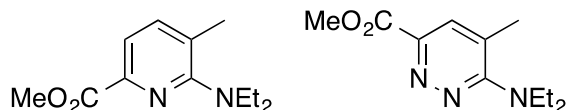

**Methyl 6-(Diethylamino)-5-methylpicolinate (24a) & Methyl 6-(Diethylamino)-5-methylpyridazine-3-carboxylate (23a).** Compound **22a** (7  $\mu$ L, 0.25 mmol, 1.0 equiv) was added to a stirred solution of **5** (34.6 mg, 0.25 mmol) in CHCl<sub>3</sub> (2.5 mL) at room temperature. The reaction mixture was stirred at room temperature for 1 h, concentrated and purified by column chromatography (SiO<sub>2</sub>, 40% EtOAc/hexanes) to afford **24a** (5.7 mg, 10%) as a yellow oil: <sup>1</sup>H NMR (CDCl<sub>3</sub>, 400 MHz)  $\delta$  7.57 (d,  $J$  = 7.6 Hz, 1H), 7.45 (d,  $J$  = 7.6 Hz, 1H), 3.93 (s, 3H), 3.28 (q,  $J$  = 7.2 Hz, 4H), 2.30 (s, 3H), 1.21 (t,  $J$  = 7.2 Hz, 6H); <sup>13</sup>C NMR (CDCl<sub>3</sub>, 100 MHz)  $\delta$  166.5, 161.2, 143.4, 139.6, 118.2, 99.5, 52.4, 44.8, 19.4, 13.5; IR  $\nu_{\max}$  1742, 1468, 1435, 1210, 1134 cm<sup>-1</sup>; HRESI-TOF  $m/z$  223.1451 (C<sub>12</sub>H<sub>18</sub>N<sub>2</sub>O<sub>2</sub> + H<sup>+</sup> requires 223.1441) and **23a** (47.4 mg, 85%) as a yellow oil: <sup>1</sup>H NMR (CDCl<sub>3</sub>, 400 MHz)  $\delta$  7.69 (s, 1H), 3.95 (s, 3H), 3.50 (q,  $J$  = 6.8 Hz, 4H), 2.31 (s, 3H), 1.17 (t,  $J$  = 6.8 Hz, 6H); <sup>13</sup>C NMR (CDCl<sub>3</sub>, 100 MHz)  $\delta$  165.3, 162.7, 144.2, 130.4, 126.5, 104.6, 52.5, 44.5, 20.1, 13.2; IR  $\nu_{\max}$  1740, 1532, 1426, 1379, 1164 cm<sup>-1</sup>; HRESI-TOF  $m/z$  224.1403 (C<sub>11</sub>H<sub>17</sub>N<sub>3</sub>O<sub>2</sub> + H<sup>+</sup> requires 224.1393).

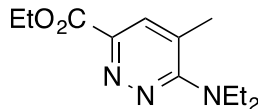

**Ethyl 6-(Diethylamino)-5-methylpyridazine-3-carboxylate (25a).** Compound **22a** (17  $\mu$ L, 0.15 mmol, 1.0 equiv) was added to a stirred solution of **6** (33.0 mg, 0.15 mmol) in CHCl<sub>3</sub> (1.5 mL) at room temperature. The reaction mixture was stirred at room temperature for 1 h, concentrated and purified by column chromatography (SiO<sub>2</sub>, 40% EtOAc/hexanes) to afford **25a** (27.7 mg, 80%) as an oil: <sup>1</sup>H NMR (CDCl<sub>3</sub>, 400 MHz)  $\delta$  7.71 (s, 1H), 4.43 (q,  $J$  = 7.2 Hz, 2H), 3.51 (q,  $J$  = 6.8 Hz, 4H), 2.32 (s, 3H), 1.41 (t,  $J$  = 7.2 Hz, 3H), 1.20 (t,  $J$  = 6.8 Hz, 6H); <sup>13</sup>C NMR (CDCl<sub>3</sub>, 100 MHz)  $\delta$  164.9, 162.7, 144.6, 130.4, 126.6, 61.6, 44.5, 20.0, 14.3, 13.2; IR  $\nu_{\max}$  1737, 1531, 1403, 1379, 1166, 1102, 1023 cm<sup>-1</sup>; HRESI-TOF  $m/z$  238.1551 (C<sub>12</sub>H<sub>19</sub>N<sub>3</sub>O<sub>2</sub> + H<sup>+</sup> requires 238.1550).

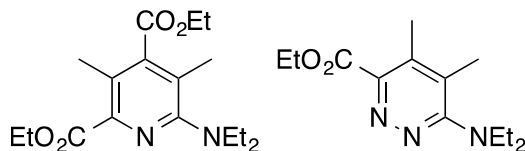

**Diethyl 6-(Diethylamino)-3,5-dimethylpyridine-2,4-dicarboxylate (27a) & Ethyl 6-(Diethylamino)-4,5-dimethylpyridazine-3-carboxylate (26a).** Compound **22a** (31  $\mu$ L, 0.28 mmol, 1.0 equiv) was added to a stirred solution of **8** (66.5 mg, 0.28 mmol) in CHCl<sub>3</sub> (3.0 mL) at room temperature. The reaction mixture was stirred at room temperature for 1 h, concentrated and purified by column chromatography (SiO<sub>2</sub>, 40% EtOAc/hexanes) to afford **27a** (10.6 mg, 12%) as a yellow oil: <sup>1</sup>H NMR (CDCl<sub>3</sub>, 400 MHz)  $\delta$  4.44–4.37 (m, 4H), 3.17 (q,  $J$  = 7.2 Hz, 4H), 2.32 (s, 3H), 2.20 (s, 3H), 1.41–1.36 (m, 6H), 1.08 (t,  $J$  = 7.2 Hz, 6H); <sup>13</sup>C NMR (CDCl<sub>3</sub>, 100 MHz)  $\delta$  168.4, 166.9, 159.1, 145.6, 144.0, 123.8, 121.8, 61.5, 61.1, 45.1, 15.7, 15.2, 14.2, 13.2; IR  $\nu_{\max}$  1740, 1454, 1420, 1379, 1337, 1307, 1172, 1067, 1037 cm<sup>-1</sup>; HRESI-TOF  $m/z$  323.1968 (C<sub>17</sub>H<sub>26</sub>N<sub>2</sub>O<sub>4</sub> + H<sup>+</sup> requires 323.1965) and **26a** (50.4 mg, 79%) as a yellow oil: <sup>1</sup>H NMR (CDCl<sub>3</sub>, 400 MHz)  $\delta$  4.43 (q,  $J$  = 7.2 Hz, 2H), 3.35 (q,  $J$  = 7.2 Hz, 4H), 2.41 (s, 3H), 2.21 (s, 3H), 1.42 (t,  $J$  = 7.2 Hz, 3H), 1.14 (t,  $J$  = 7.2 Hz, 6H); <sup>13</sup>C NMR (CDCl<sub>3</sub>, 100 MHz)  $\delta$  166.1, 163.3, 147.2, 137.7, 128.8, 61.5, 44.8, 15.1, 14.8, 14.1, 12.8; IR  $\nu_{\max}$  1740, 1548, 1448, 1419, 1381, 1175, 1083, 1056 cm<sup>-1</sup>; HRESI-TOF  $m/z$  252.1713 (C<sub>13</sub>H<sub>21</sub>N<sub>3</sub>O<sub>2</sub> + H<sup>+</sup> requires 252.1706).

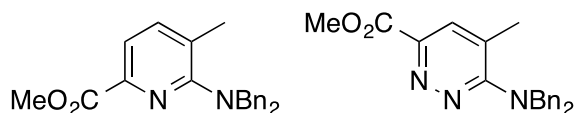

**Methyl 6-(Dibenzylamino)-5-methylpicolinate (24b) & Methyl 6-(Dibenzylamino)-5-methylpyridazine-3-carboxylate (23b).** Compound **22b** (22  $\mu$ L, 0.09 mmol, 1.0 equiv) was added to a stirred solution of **5** (13.0 mg, 0.09 mmol) in  $\text{CHCl}_3$  (1.0 mL) at room temperature. The reaction mixture was stirred at room temperature for 1 h, concentrated and purified by column chromatography ( $\text{SiO}_2$ , 40% EtOAc/hexanes) to afford **24b** (1.0 mg, 3%) as a yellow oil:  $^1\text{H}$  NMR ( $\text{CDCl}_3$ , 400 MHz)  $\delta$  7.62 (d,  $J = 7.6$  Hz, 1H), 7.47 (d,  $J = 7.6$  Hz, 1H), 7.38–7.21 (m, 10H), 4.41 (s, 4H), 3.94 (s, 3H), 2.41 (s, 3H);  $^{13}\text{C}$  NMR ( $\text{CDCl}_3$ , 100 MHz)  $\delta$  140.0, 139.0, 128.51, 128.49, 128.2, 126.8, 119.4, 112.4, 107.7, 54.5, 52.4, 19.2; IR  $\nu_{\text{max}}$  1740, 1454, 1357, 1315, 1264, 1201, 1135, 700, 426  $\text{cm}^{-1}$ ; HRESI-TOF  $m/z$  347.1755 ( $\text{C}_{22}\text{H}_{22}\text{N}_2\text{O}_2 + \text{H}^+$  requires 347.1754) and **23b** (21.3 mg, 66%) as a yellow oil:  $^1\text{H}$  NMR ( $\text{CDCl}_3$ , 400 MHz)  $\delta$  7.80 (d,  $J = 0.8$  Hz, 1H), 7.33–7.25 (m, 10H), 4.71 (s, 4H), 4.00 (s, 3H), 2.41 (d,  $J = 0.8$  Hz, 3H);  $^{13}\text{C}$  NMR ( $\text{CDCl}_3$ , 100 MHz)  $\delta$  165.1, 163.6, 145.5, 137.6, 130.9, 128.5, 128.0, 127.6, 127.3, 53.4, 52.7, 19.8; IR  $\nu_{\text{max}}$  1740, 1583, 1531, 1494, 1438, 1417, 1388, 1361, 1264, 1227, 1173, 1113, 741, 699  $\text{cm}^{-1}$ ; HRESI-TOF  $m/z$  348.1789 ( $\text{C}_{21}\text{H}_{21}\text{N}_3\text{O}_2 + \text{H}^+$  requires 348.1710).

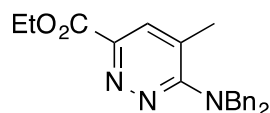

**Ethyl 6-(Dibenzylamino)-5-methylpyridazine-3-carboxylate (25b).** Compound **22b** (26  $\mu$ L, 0.11 mmol, 1.0 equiv) was added to a stirred solution of **6** (25.0 mg, 0.11 mmol) in  $\text{CHCl}_3$  (1.0 mL) at room temperature. The reaction mixture was stirred at room temperature for 1 h, concentrated and purified by column chromatography ( $\text{SiO}_2$ , 40% EtOAc/hexanes) to afford **25b** (27.9 mg, 70%) as a yellow oil:  $^1\text{H}$  NMR ( $\text{CDCl}_3$ , 400 MHz)  $\delta$  7.93 (s, 1H), 7.47–7.37 (m, 10H), 4.84 (s, 4H), 4.60 (q,  $J = 7.2$  Hz, 2H), 2.55 (s, 3H), 1.58 (t,  $J = 7.2$  Hz, 3H);  $^{13}\text{C}$  NMR ( $\text{CDCl}_3$ , 100 MHz)  $\delta$  164.7, 163.6, 145.8, 137.6, 130.9, 128.5, 127.9, 127.6, 127.3, 61.9, 53.4, 19.8, 14.3; IR  $\nu_{\text{max}}$  1740, 1531, 1452, 1404, 1358, 1227, 1172, 1109, 1026, 744, 699  $\text{cm}^{-1}$ ; HRESI-TOF  $m/z$  362.1867 ( $\text{C}_{22}\text{H}_{23}\text{N}_3\text{O}_2 + \text{H}^+$  requires 362.1863).

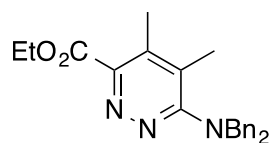

**Ethyl 6-(Dibenzylamino)-4,5-dimethylpyridazine-3-carboxylate (26b).** Compound **22b** (49  $\mu$ L, 0.21 mmol, 1.0 equiv) was added to a stirred solution of **8** (49.0 mg, 0.21 mmol) in  $\text{CHCl}_3$  (2.0 mL) at room temperature. The reaction mixture was stirred at room temperature for 1 h, concentrated and purified by column chromatography ( $\text{SiO}_2$ , 40% EtOAc/hexanes) to afford **26b** (62.8 mg, 81%) as a white solid:  $^1\text{H}$  NMR ( $\text{CDCl}_3$ , 400 MHz)  $\delta$  7.27–7.25 (m, 10 H), 4.49 (s, 4H), 4.47 (q,  $J = 7.2$  Hz, 2H), 2.43 (s, 3H), 2.36 (s, 3H), 1.44 (t,  $J = 7.2$  Hz, 3H);  $^{13}\text{C}$  NMR ( $\text{CDCl}_3$ , 100 MHz)  $\delta$  165.9, 163.7, 148.2, 140.2, 138.3, 137.8, 129.4, 129.0, 128.4, 128.3, 128.2, 128.1, 127.1, 126.9, 125.2, 61.8, 54.4, 53.1, 15.2, 14.7, 14.2; IR  $\nu_{\text{max}}$  1740, 1449, 1410, 1364, 1219, 1140, 1094, 1056, 1026, 738, 697  $\text{cm}^{-1}$ ; HRESI-TOF  $m/z$  376.2019 ( $\text{C}_{23}\text{H}_{25}\text{N}_3\text{O}_2 + \text{H}^+$  requires 376.2019).

## V. References

1. Anderson, E. D.; Boger, D. L. *J. Am. Chem. Soc.* **2011**, *133*, 12285.
2. 3-Carbomethoxypyrazole was purchased from Matrix Scientific and used as received.
3. Hynes, J.; Doubleday, W.; Dyckman, A.; Godfrey, J.; Grosso, J.; Kiau, S.; Leftheris, K. *J. Org. Chem.* **2004**, *69*, 1368.
4. 3,5-Dicarboethoxypyrazole was purchased from Acros Organics and used as received.
5. Parlanti, L.; Discordia, R.; Hynes, J.; Miller, M.; O'Grady, H.; Shi, Z. *Org. Lett.* **2007**, *9*, 3821.
6. Duerfeldt, A. S.; Boger, D. L. *J. Am. Chem. Soc.* **2014**, *136*, 2119.
7. Kobayashi, K.; Igura, Y.; Imachi, S.; Masui, Y.; Onaka, M. *Chem. Lett.* **2007**, *36*, 60.
8. Babinski, D.; Aguilar, H.; Still, R.; Frantz, D. *J. Org. Chem.* **2011**, *76*, 5915.
9. Carlson, R.; Nilsson, A. *Acta Chem. Scand., Ser. B* **1984**, *38*, 49.

## VI. $^1\text{H}$ NMR Spectra

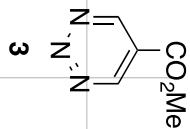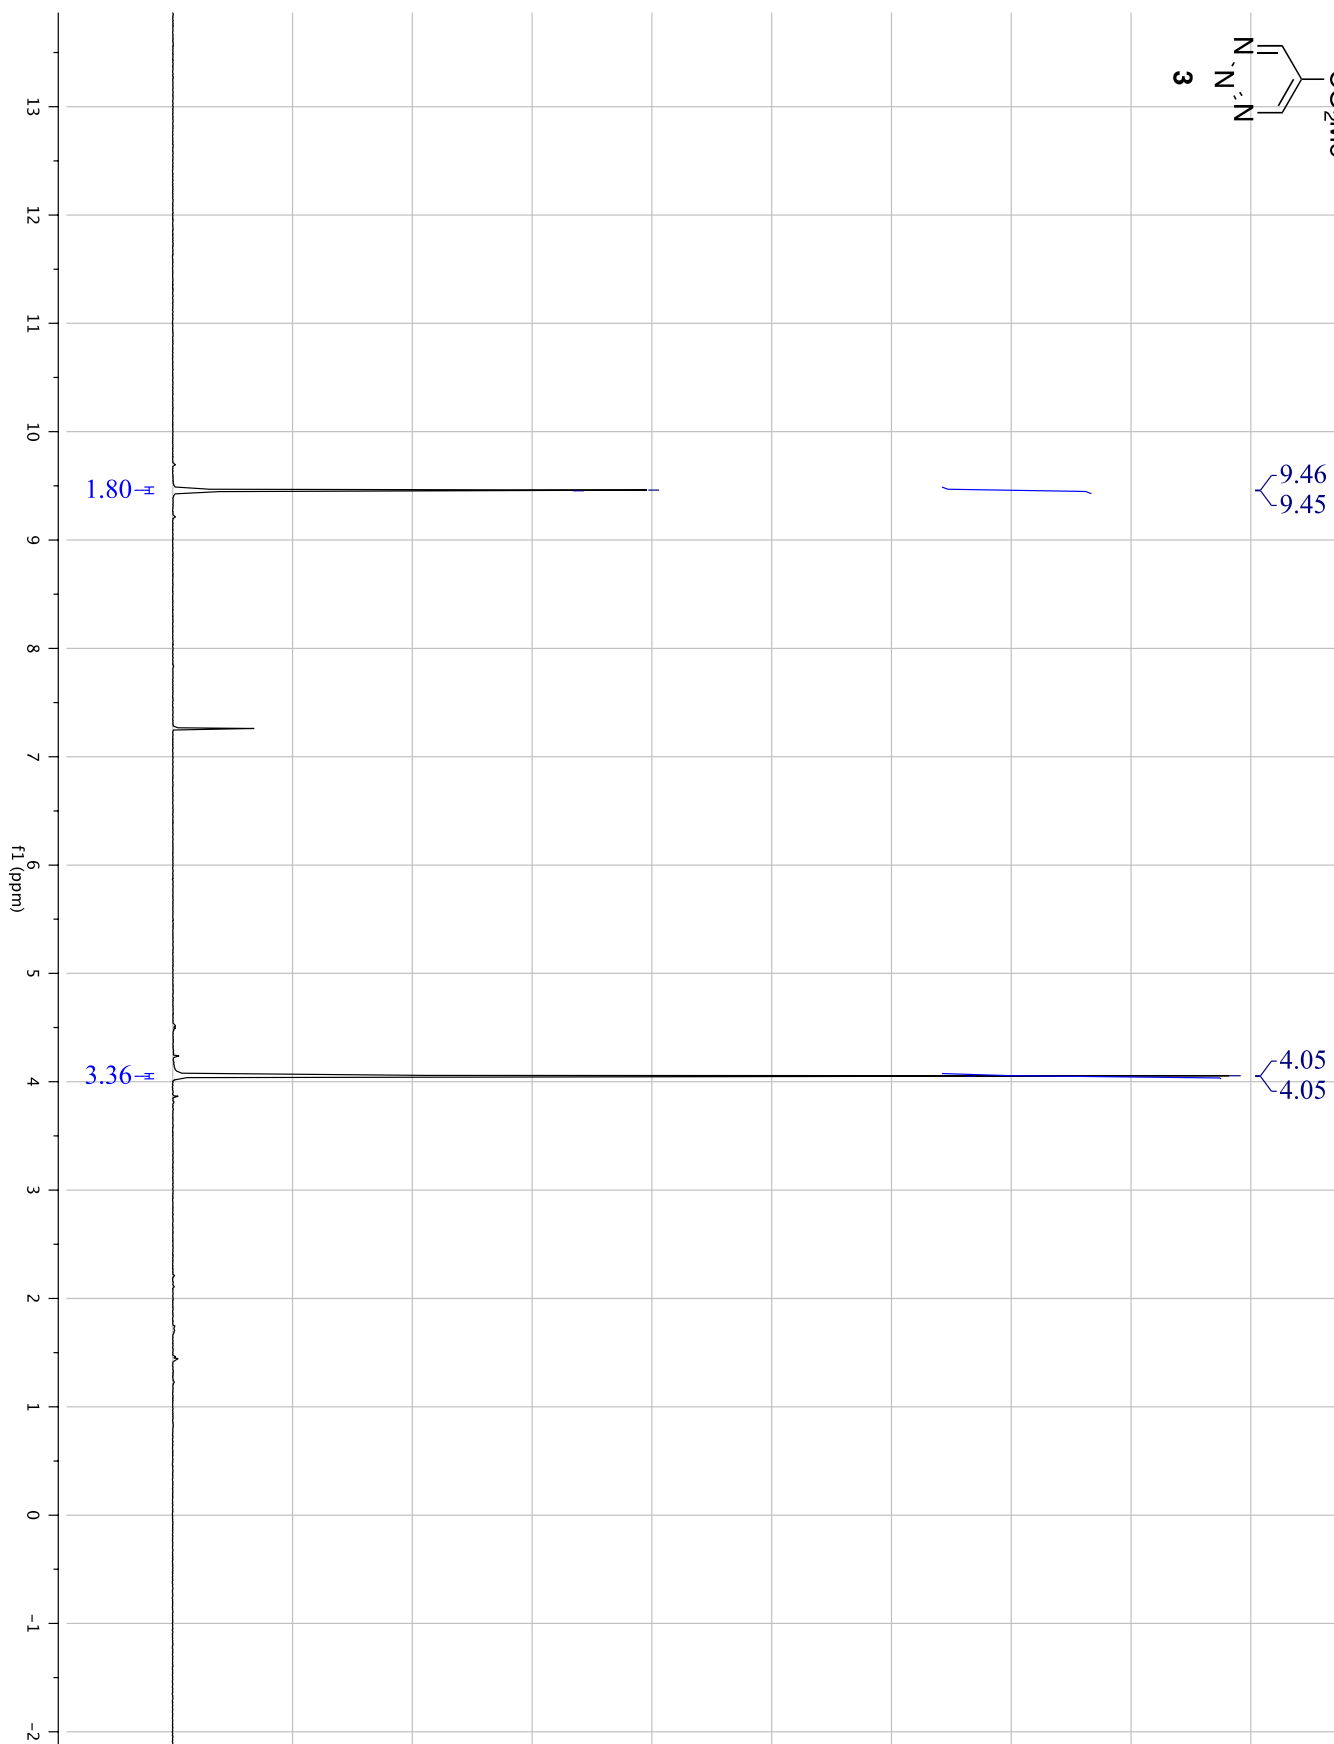

kezl\_333\_01  
Std. proton

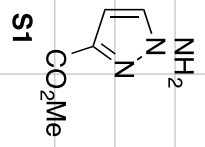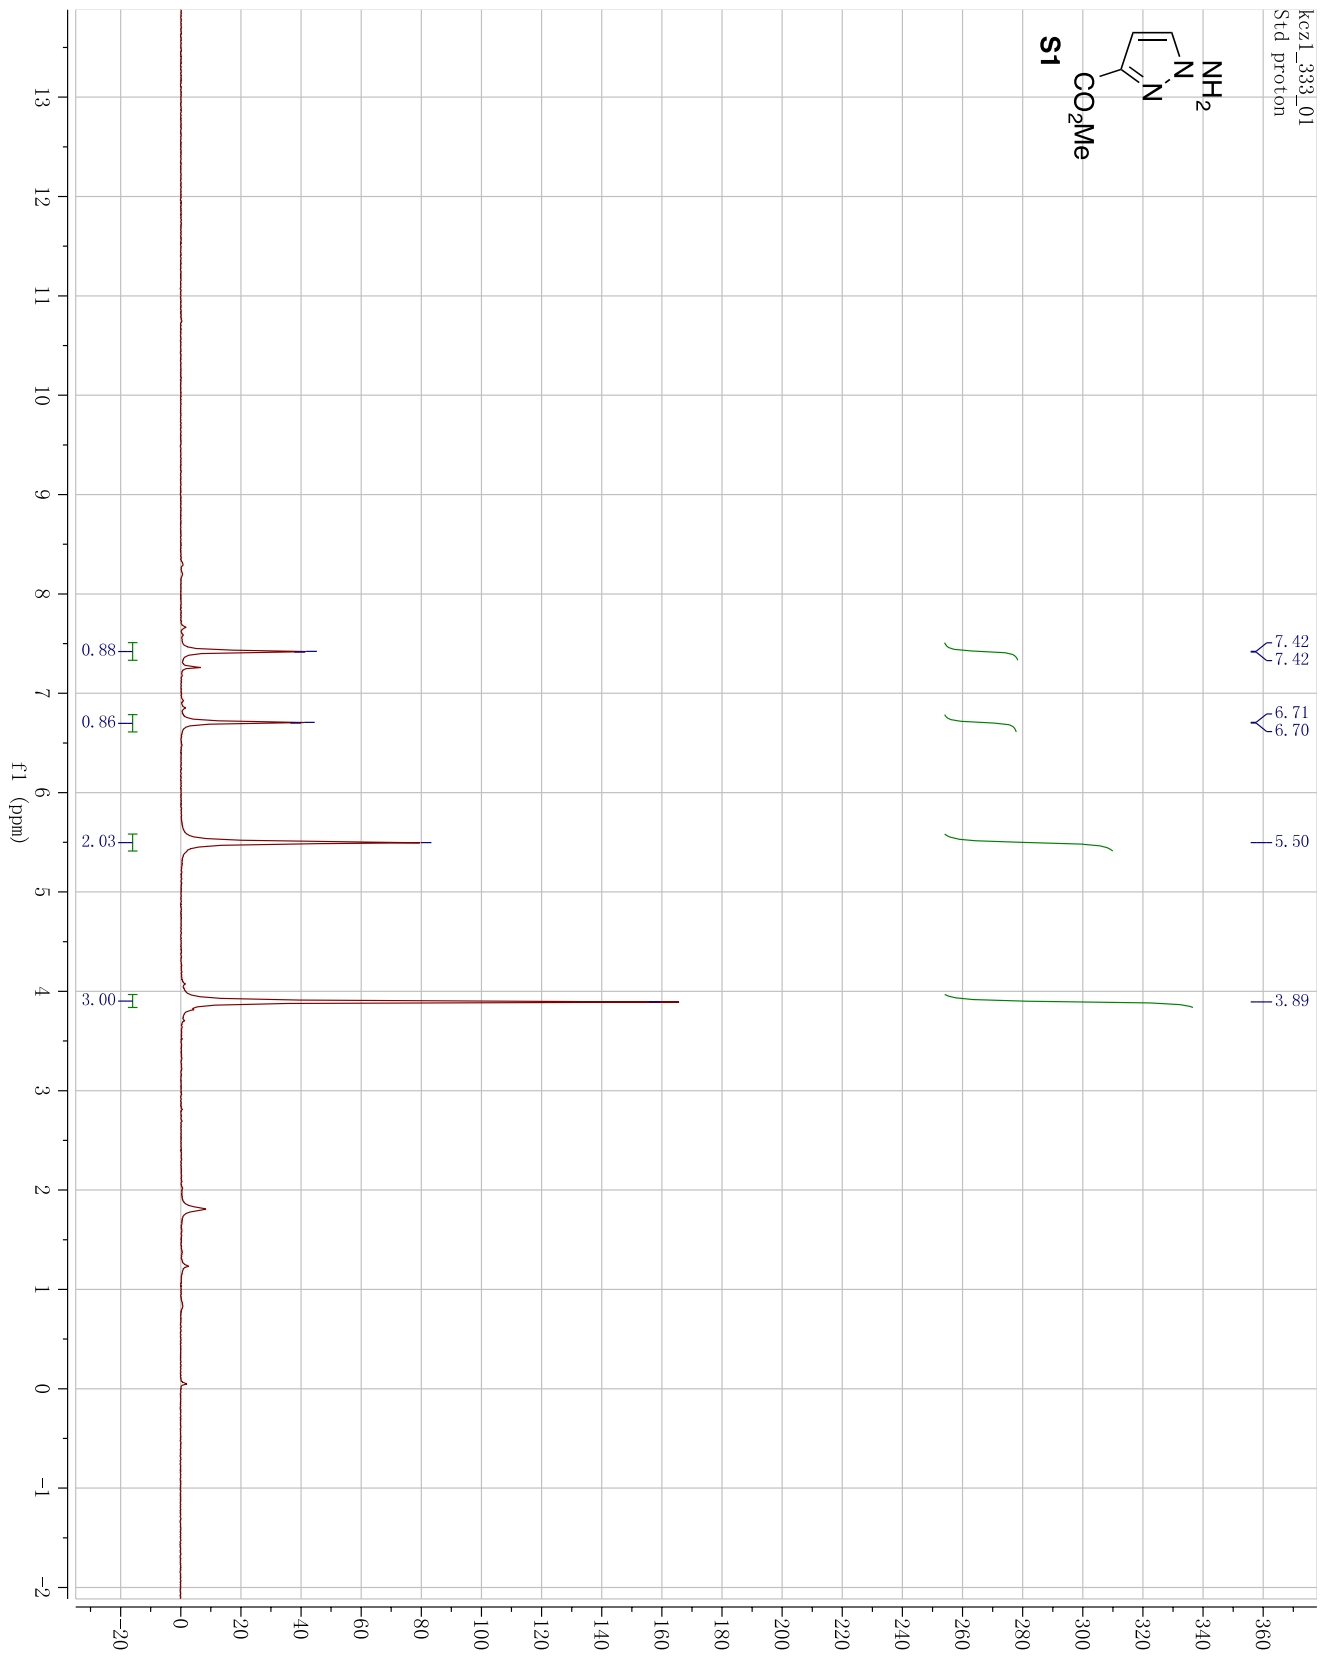

kc23\_isomer01p/1  
H-1 Routine, DRX-500, BBO Probe

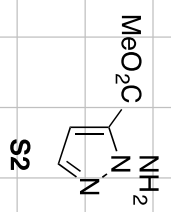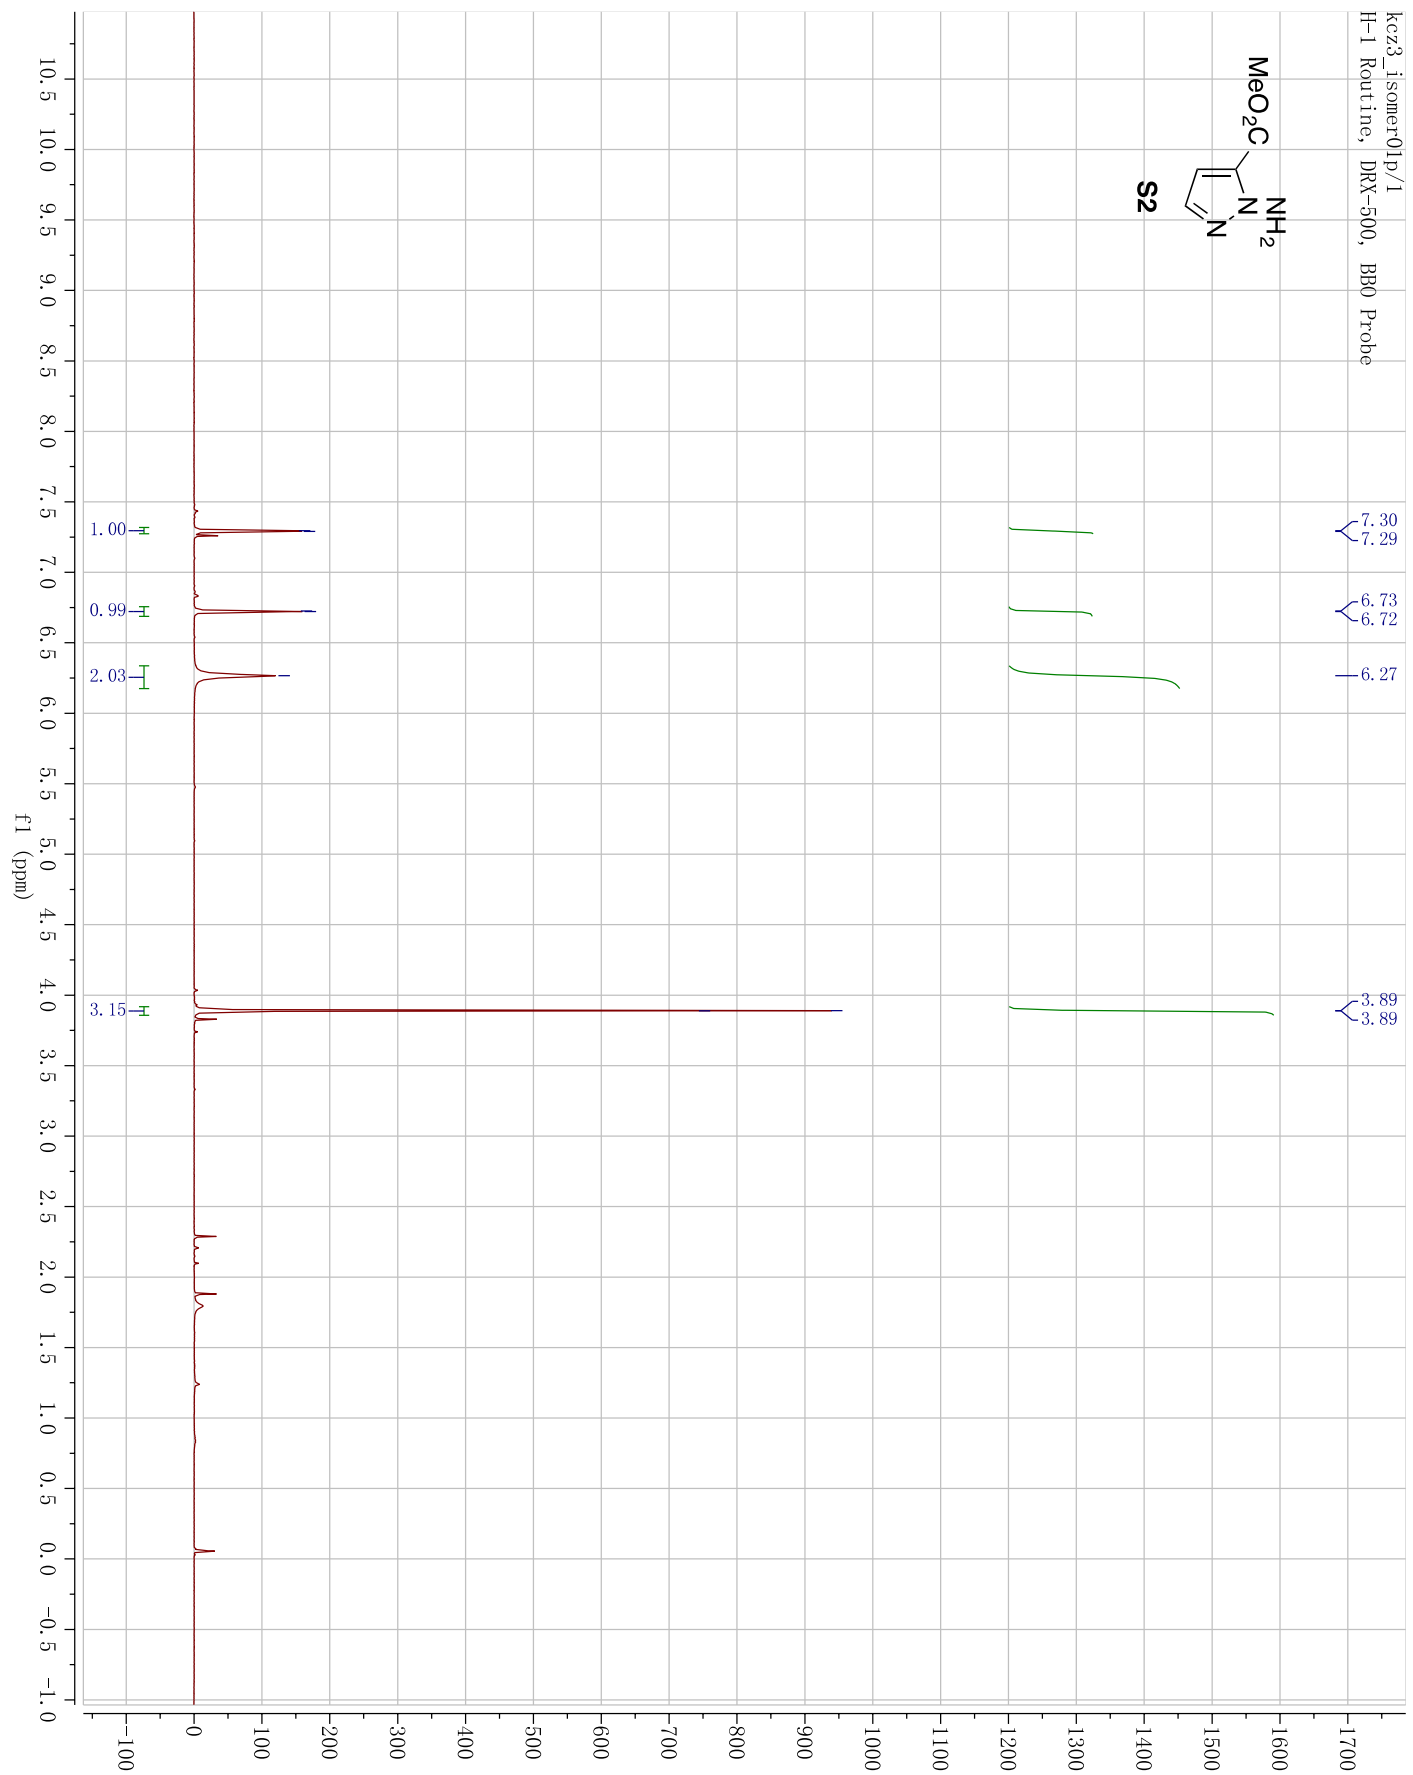



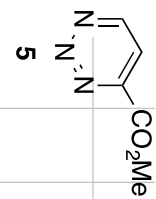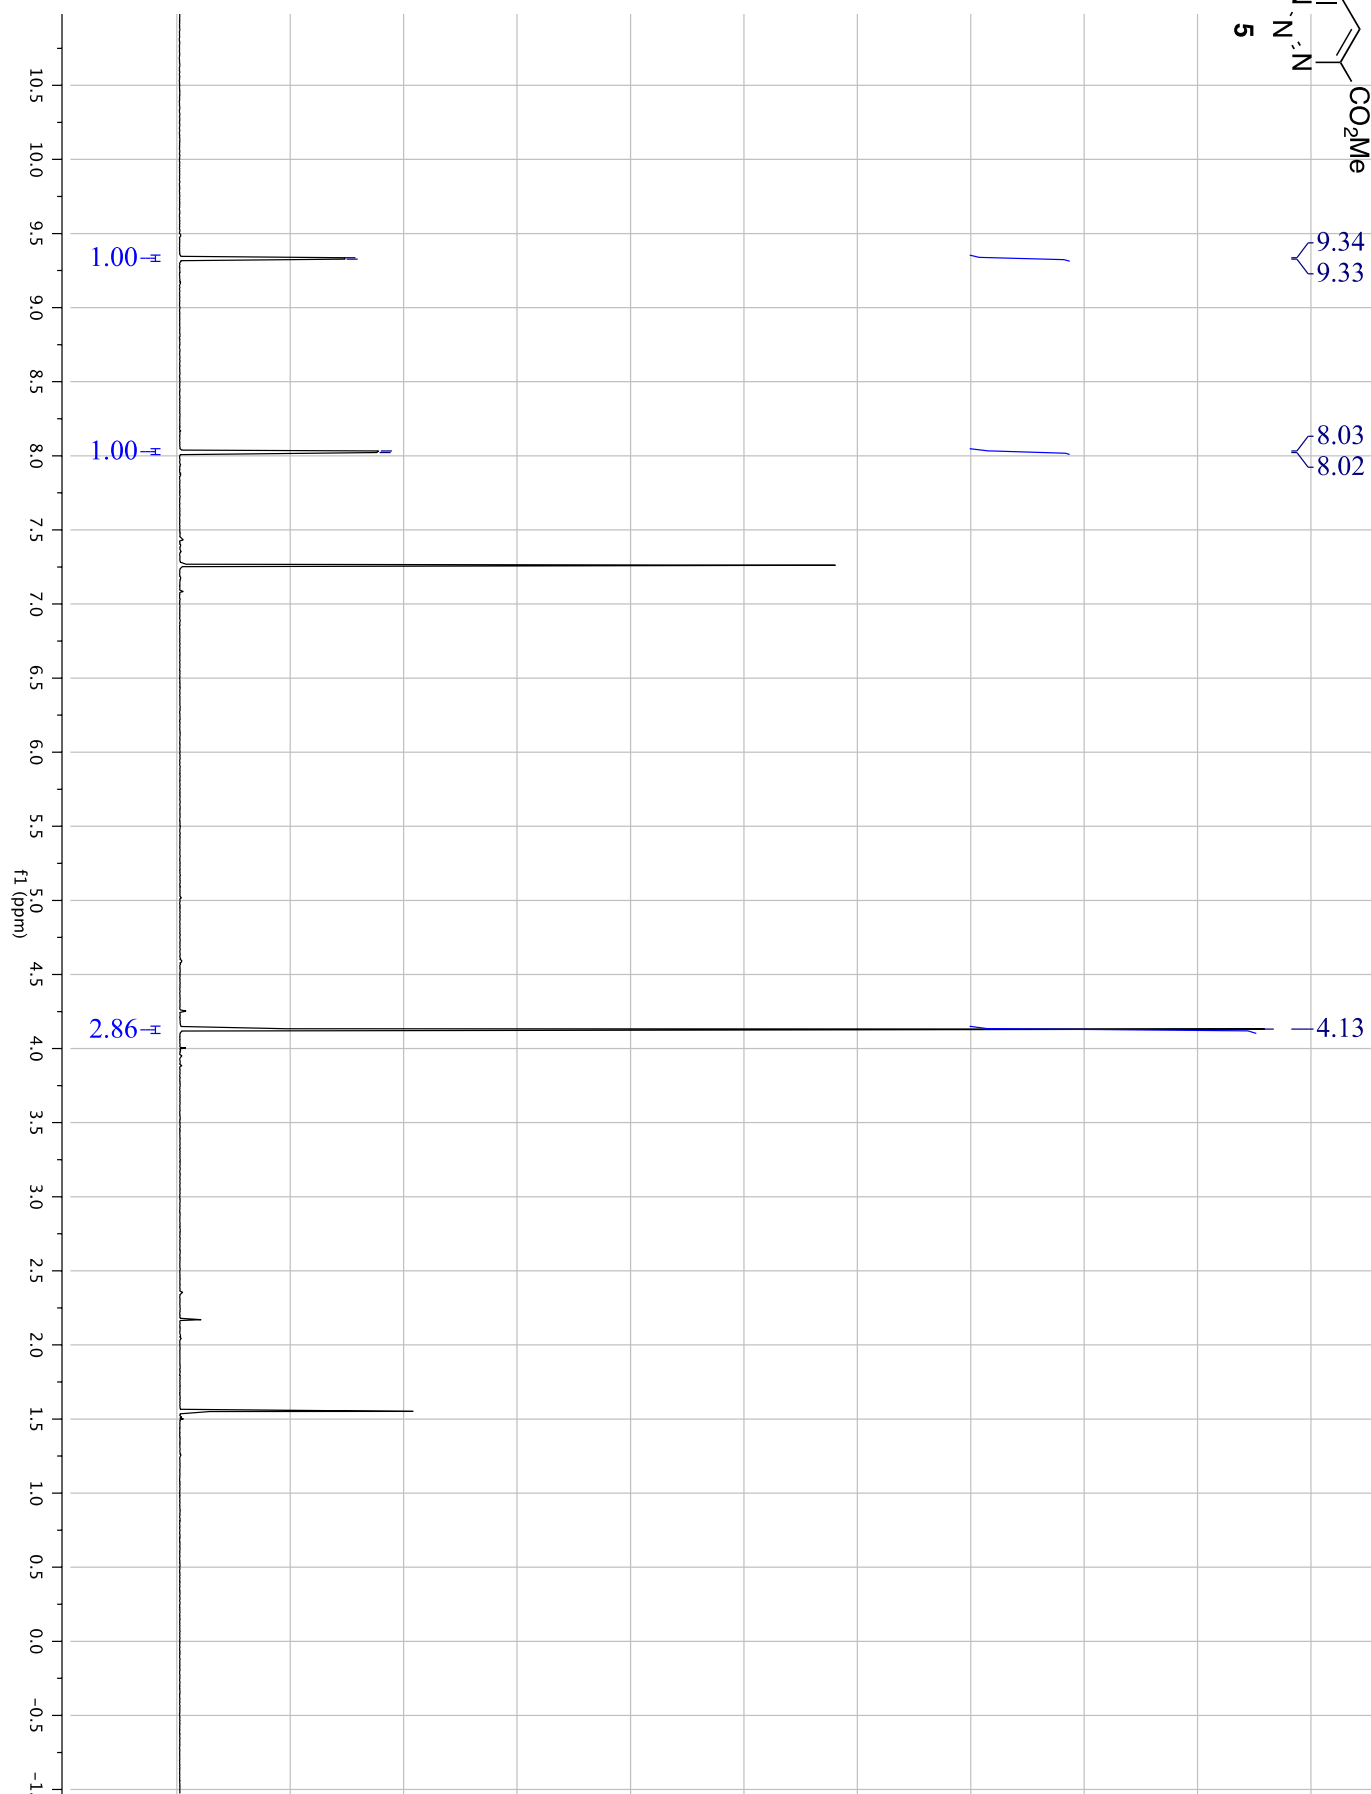

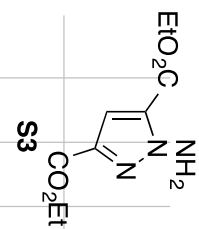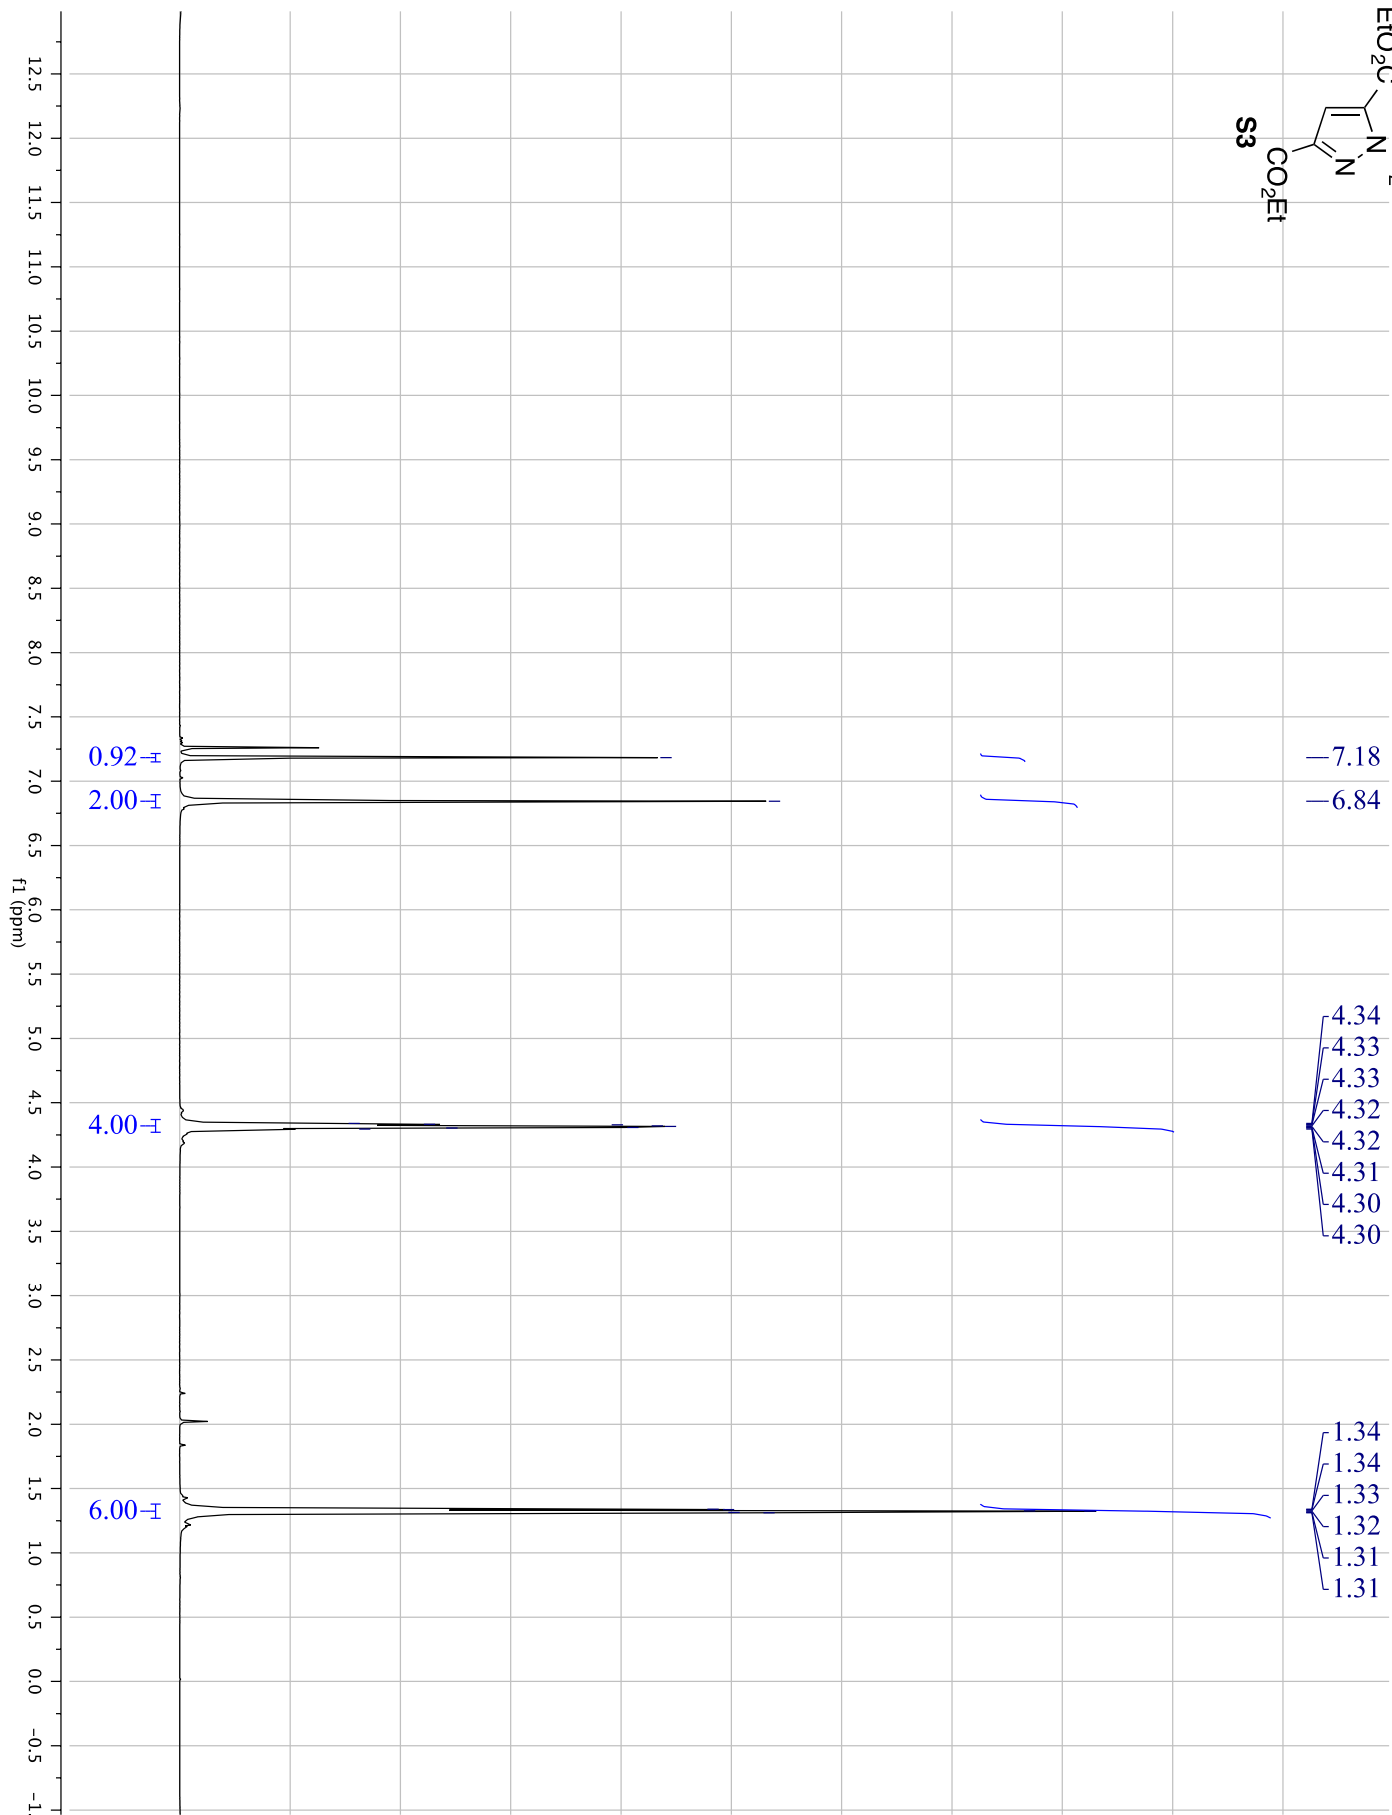

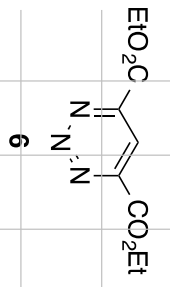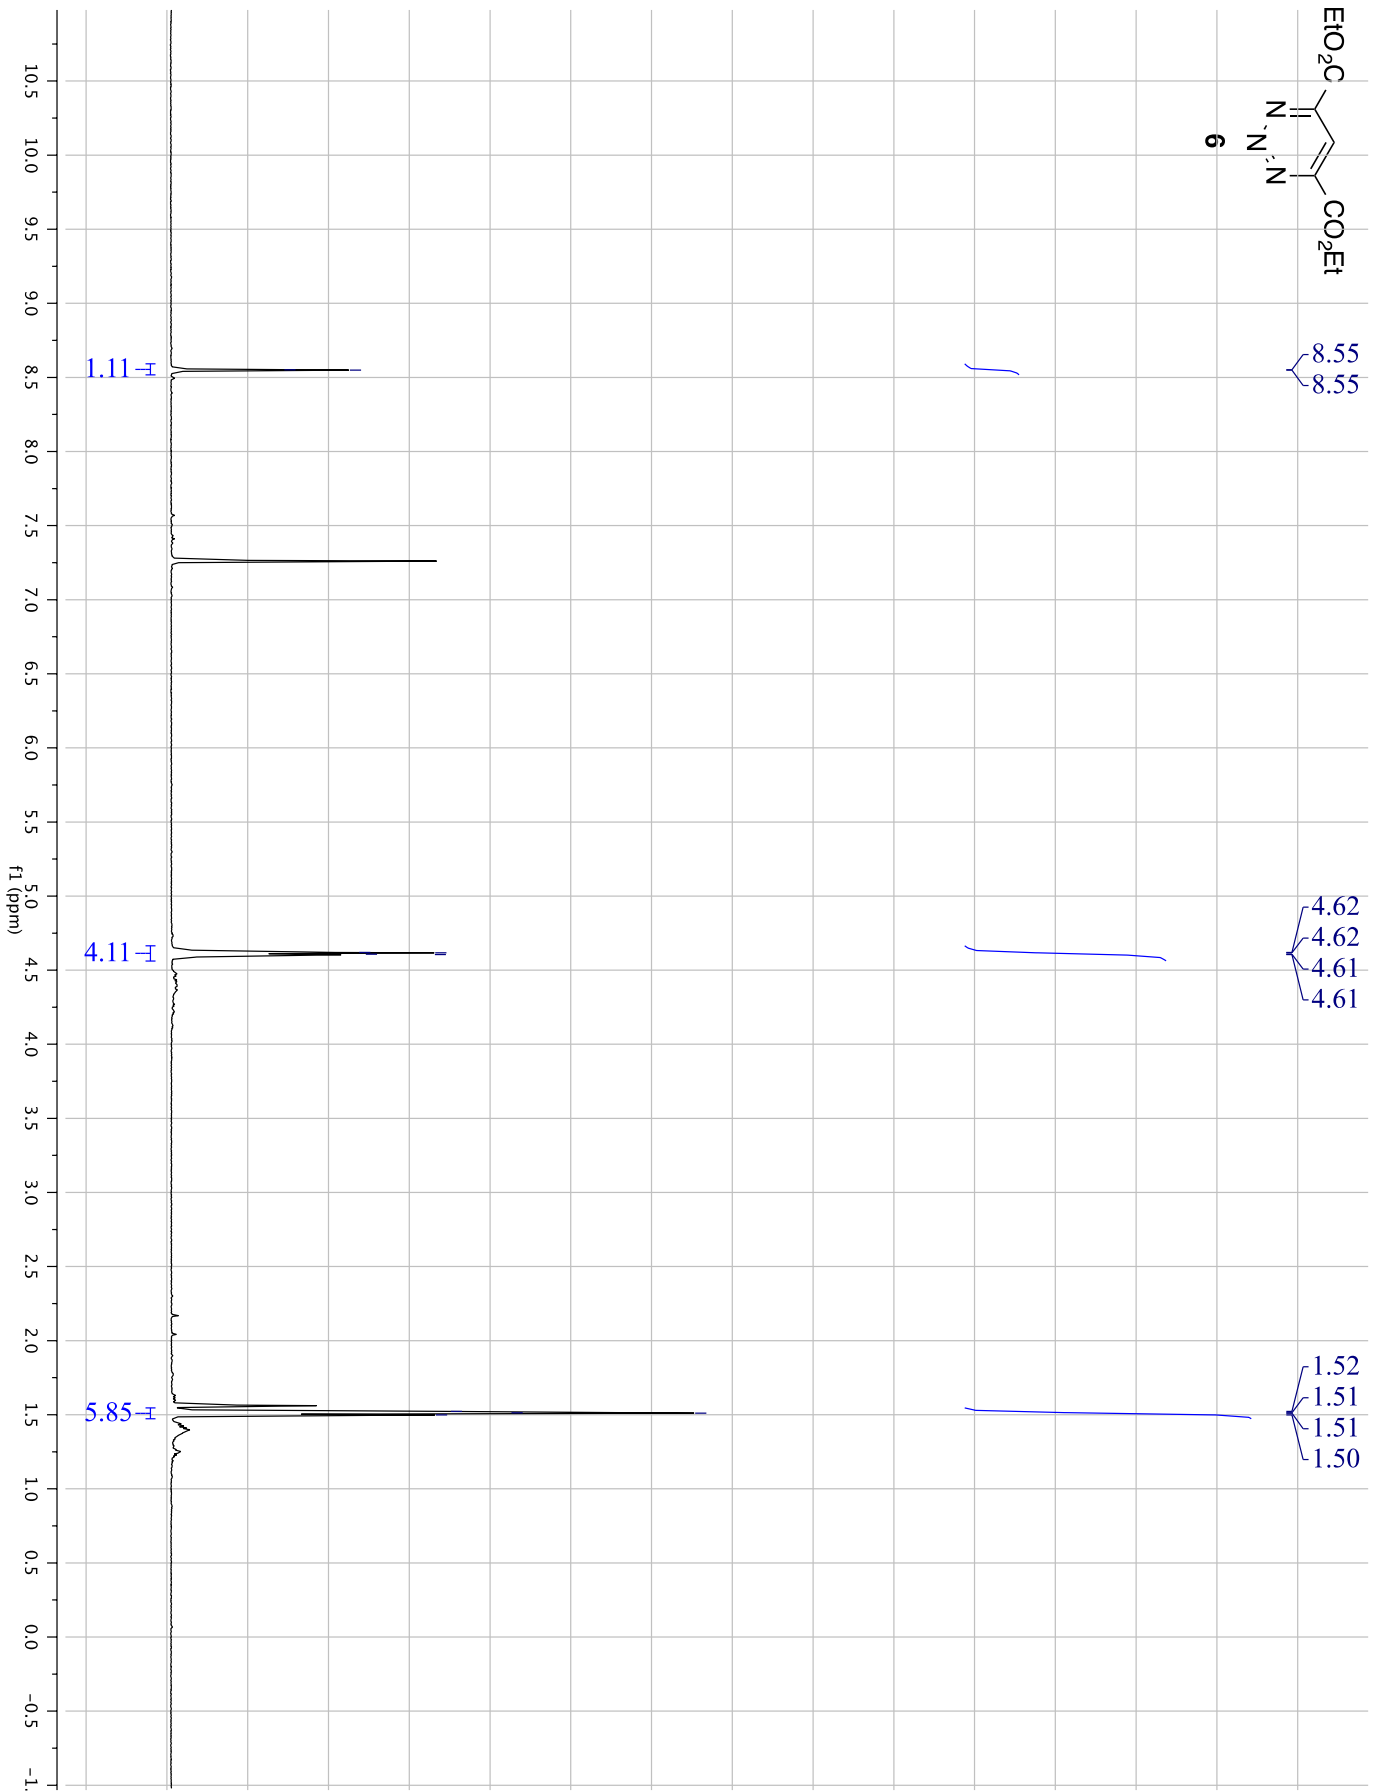

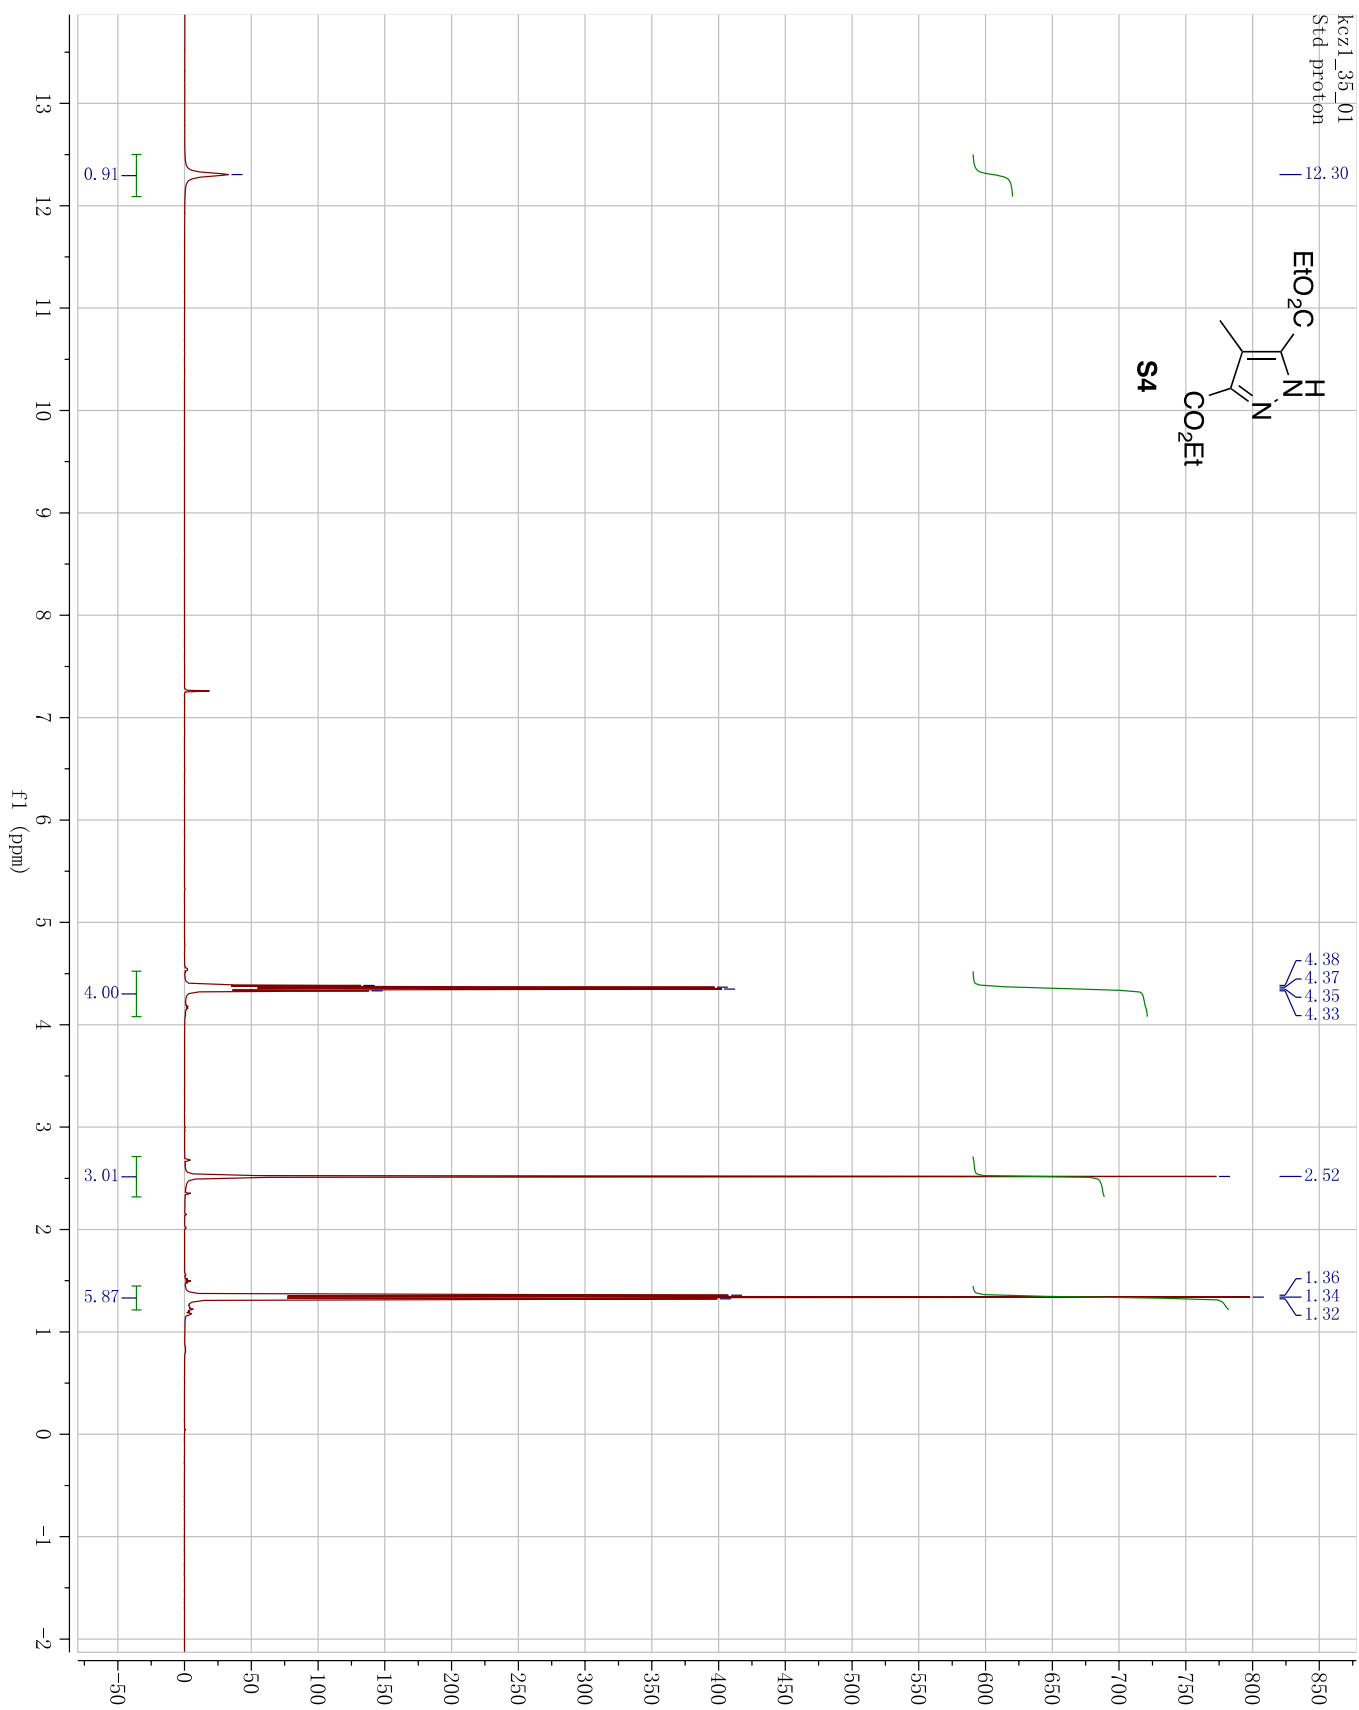

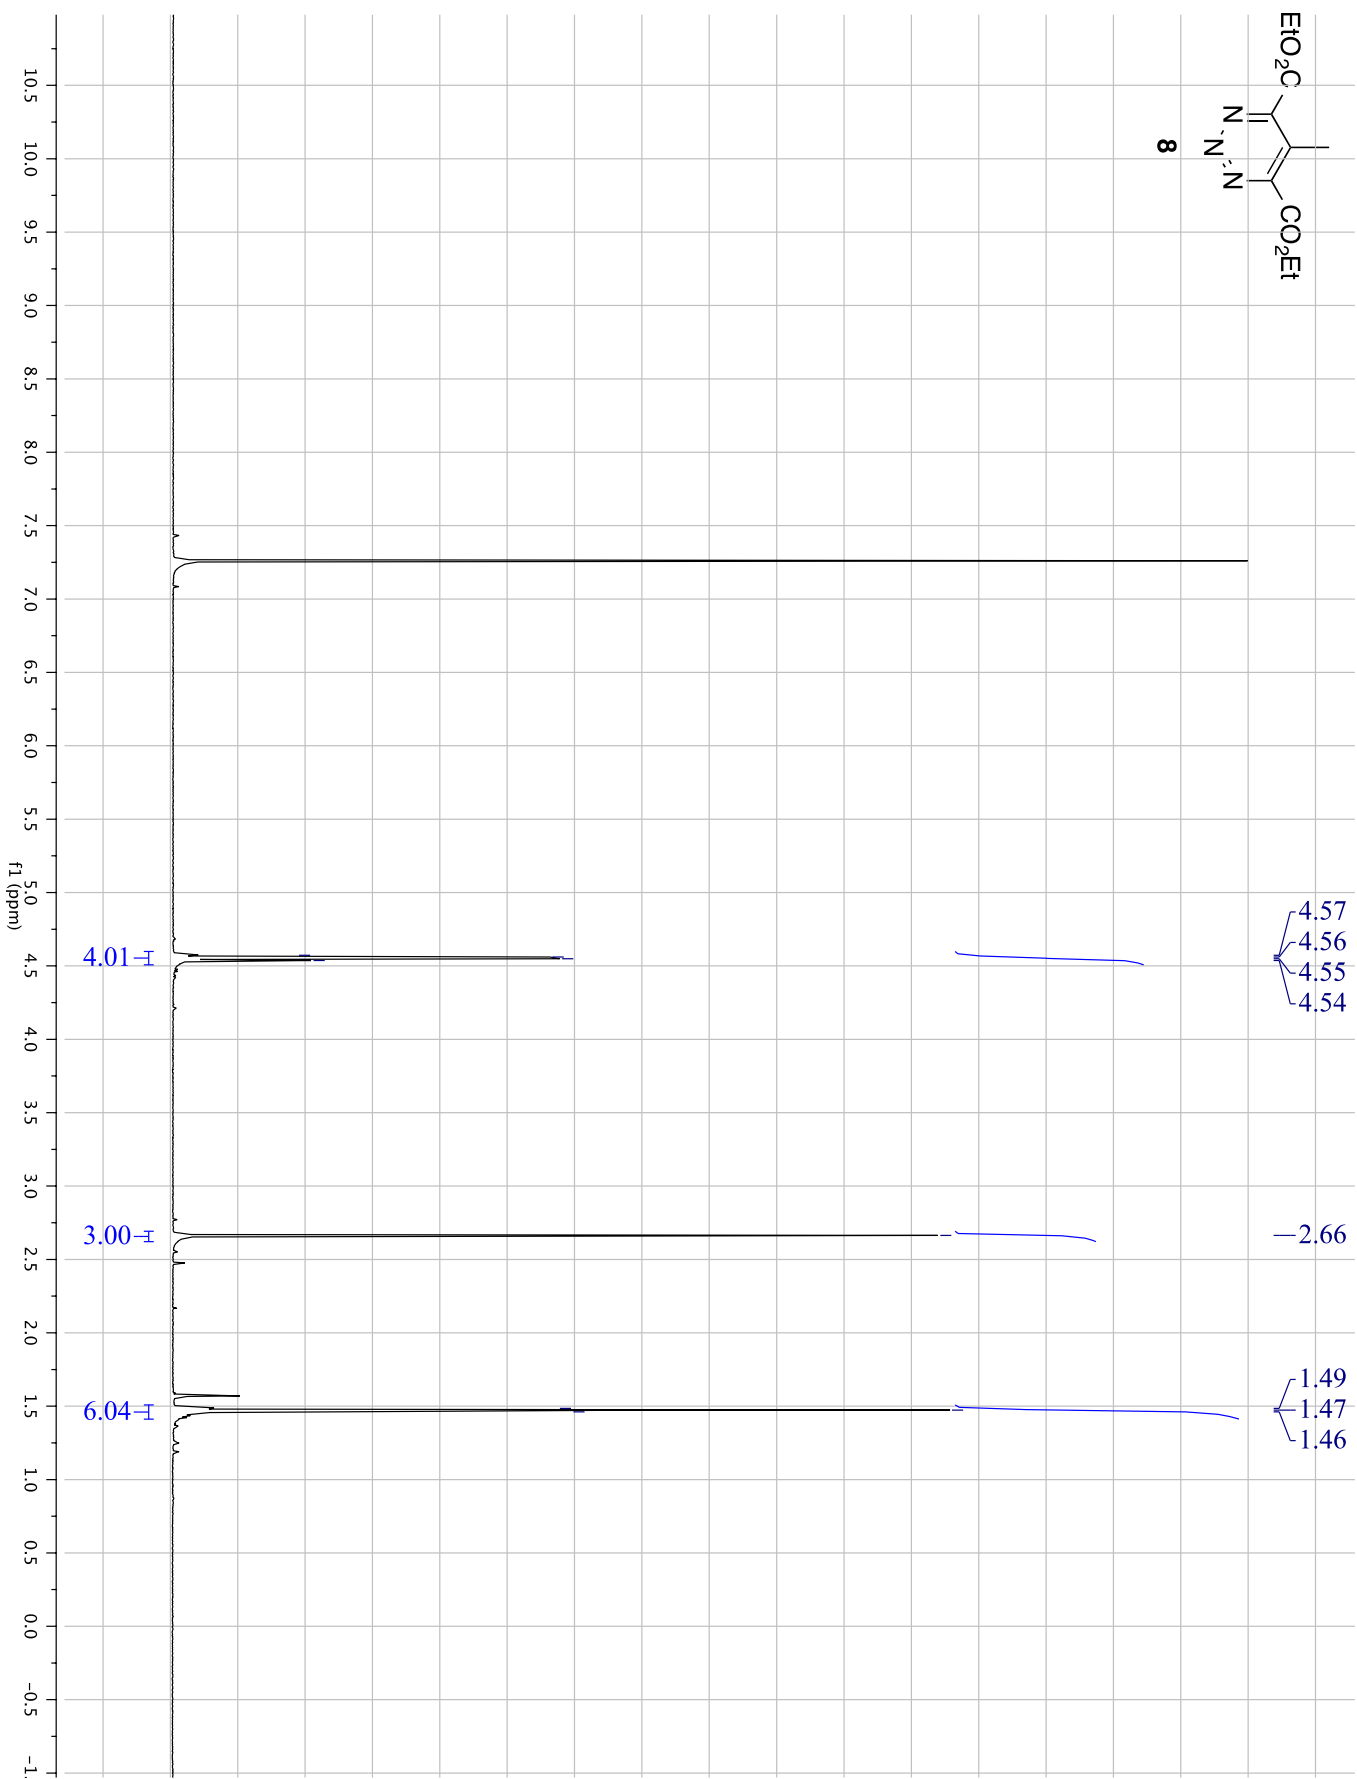

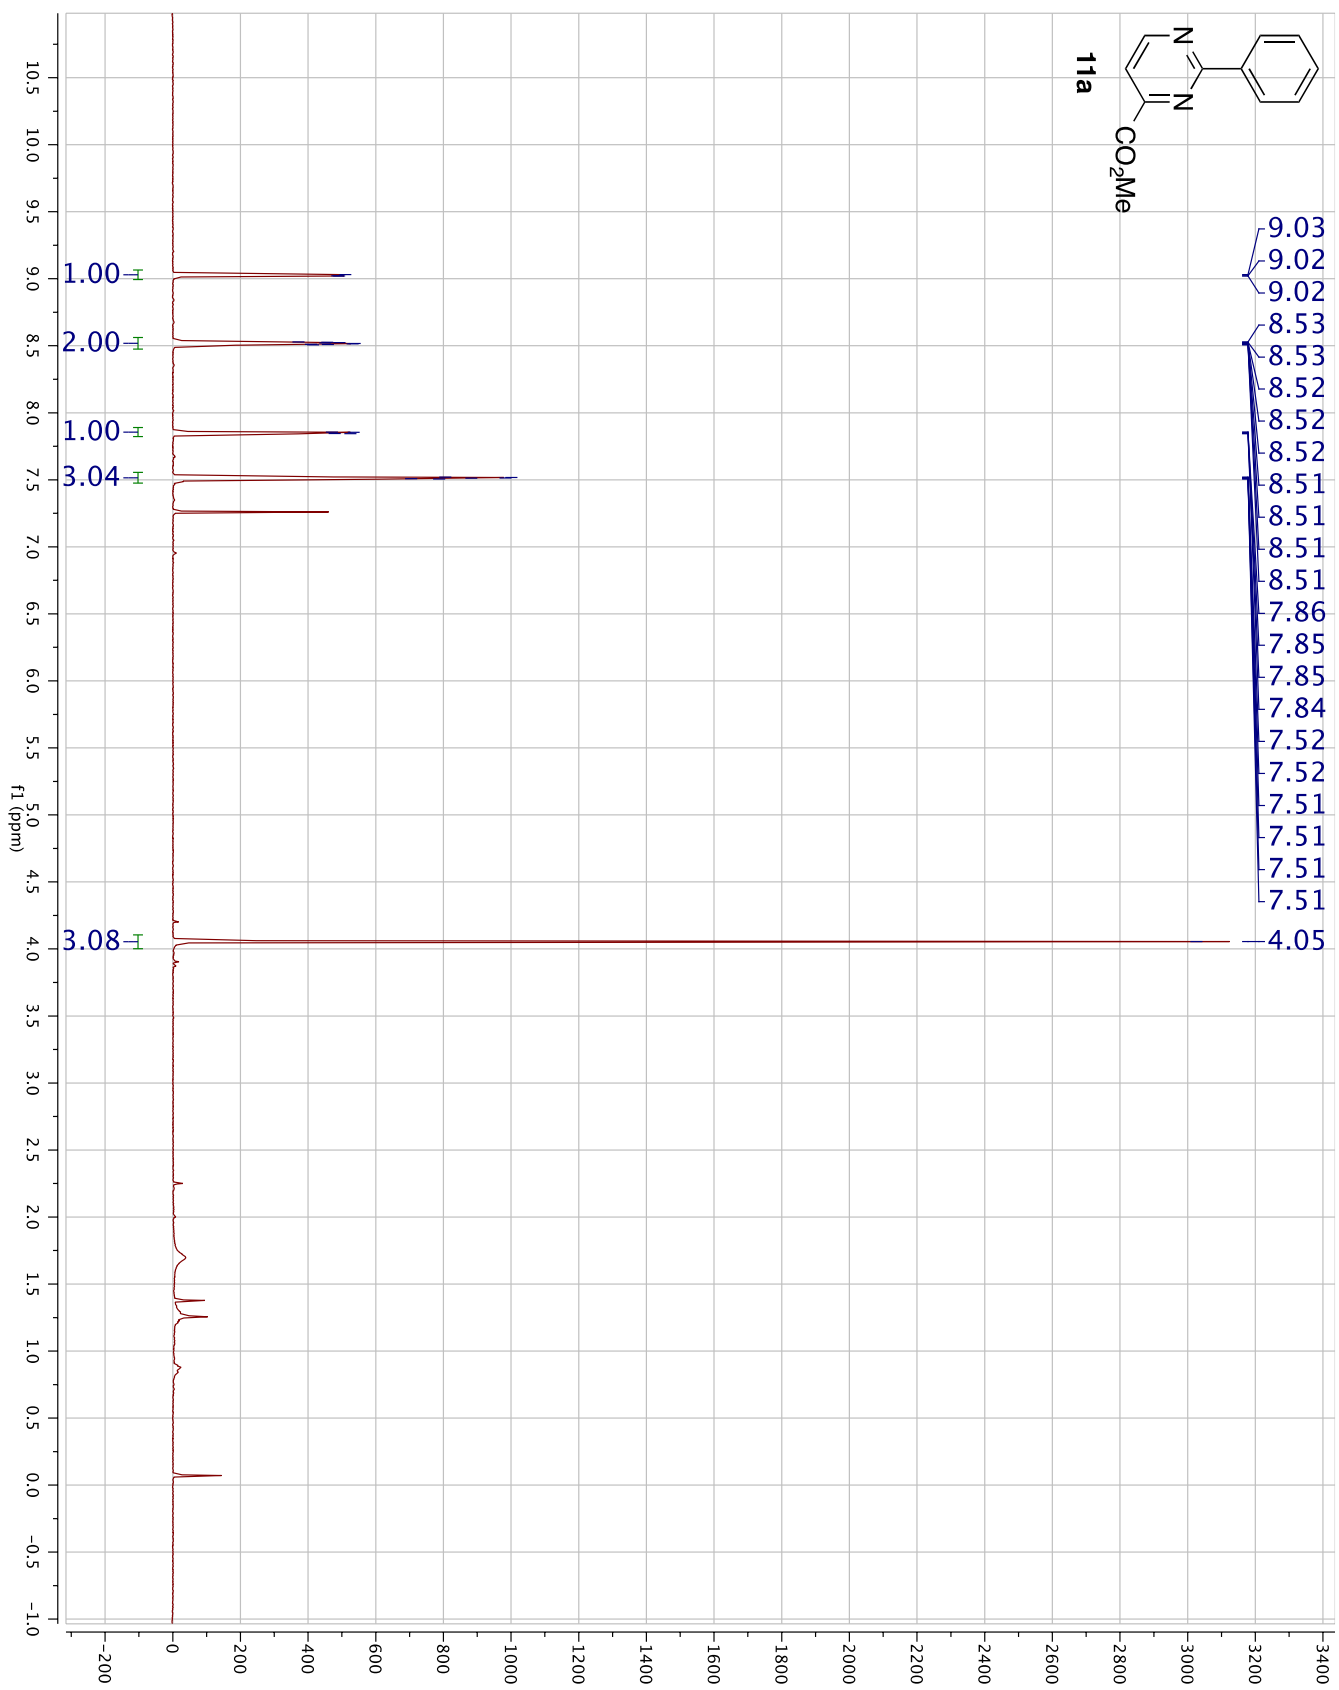

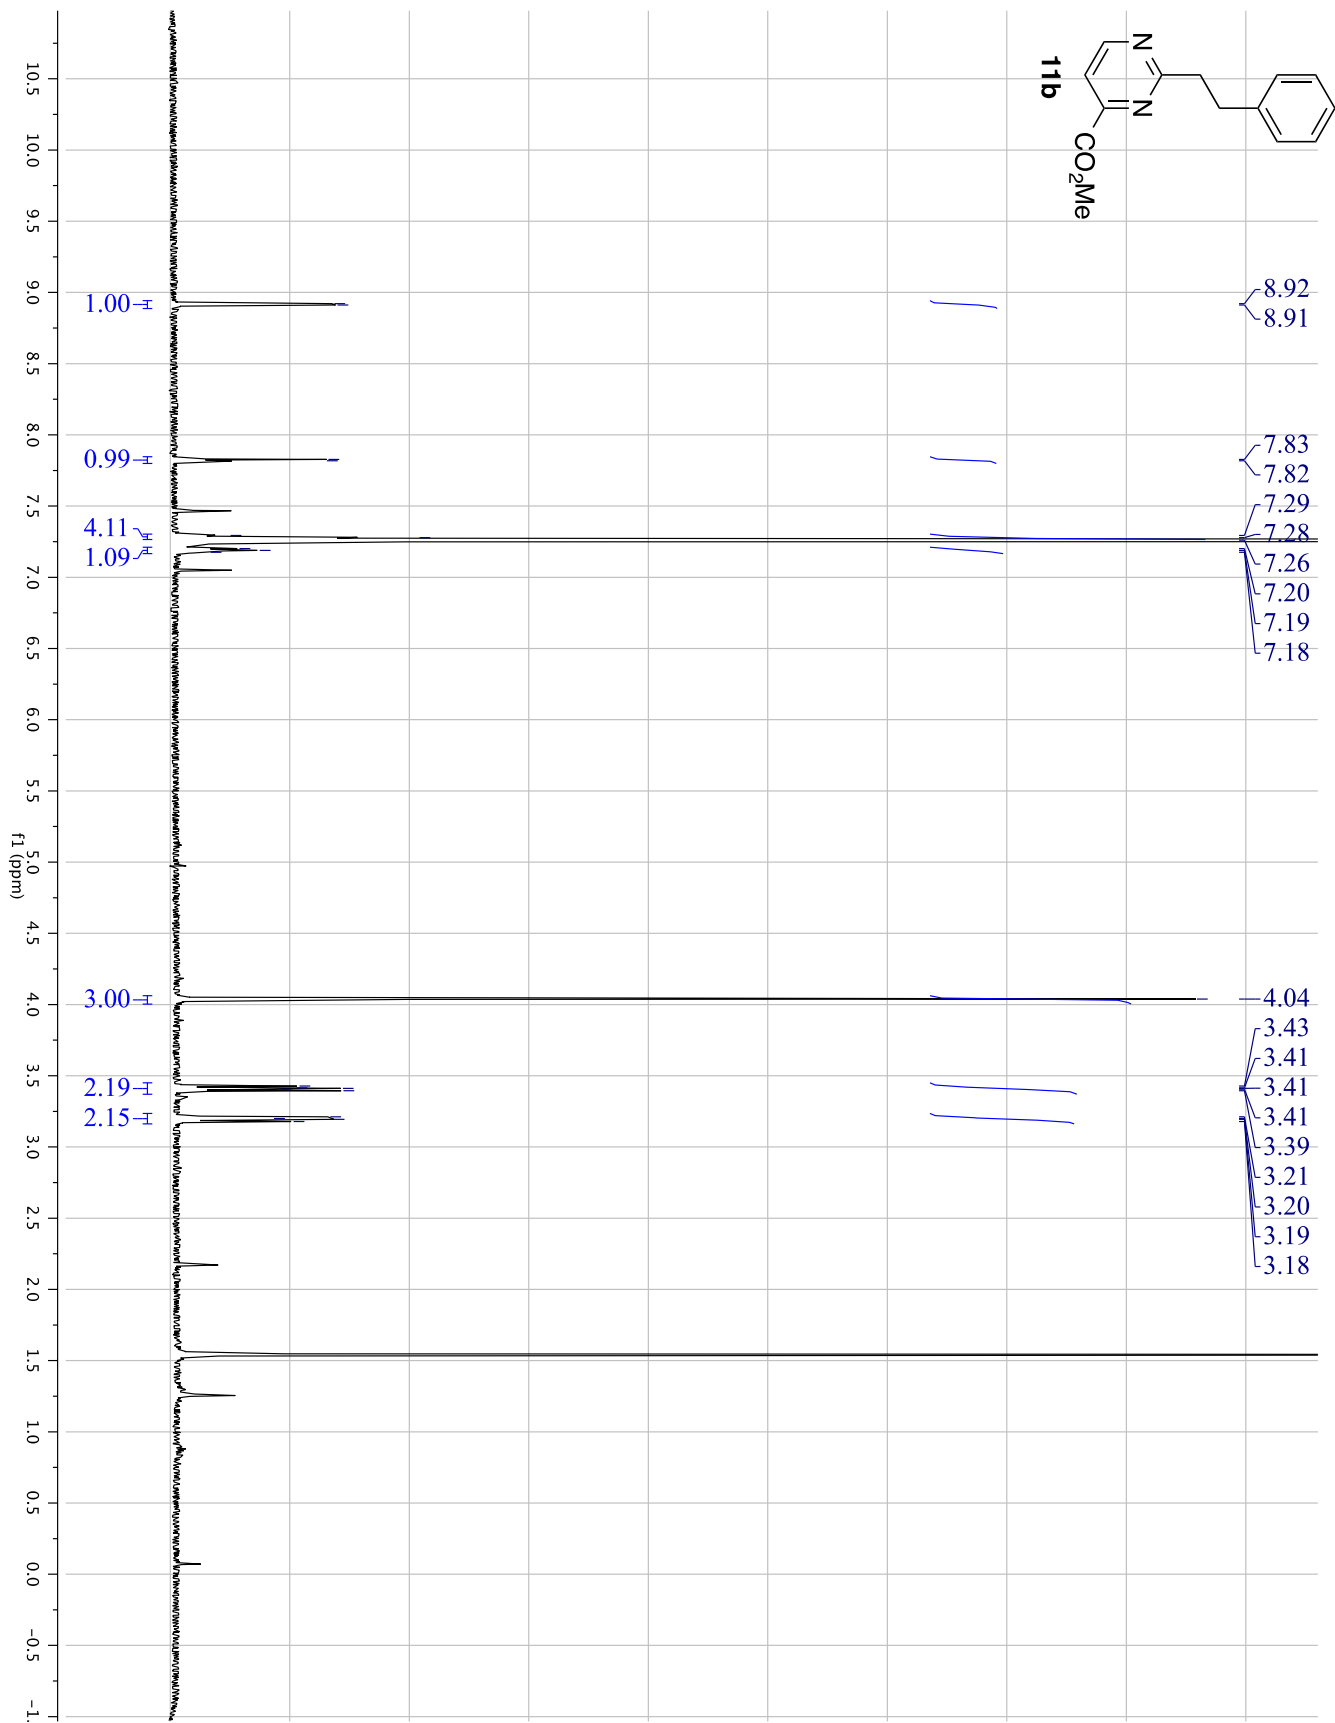

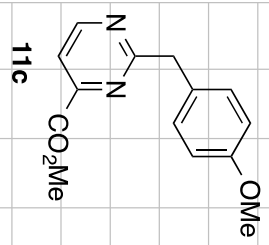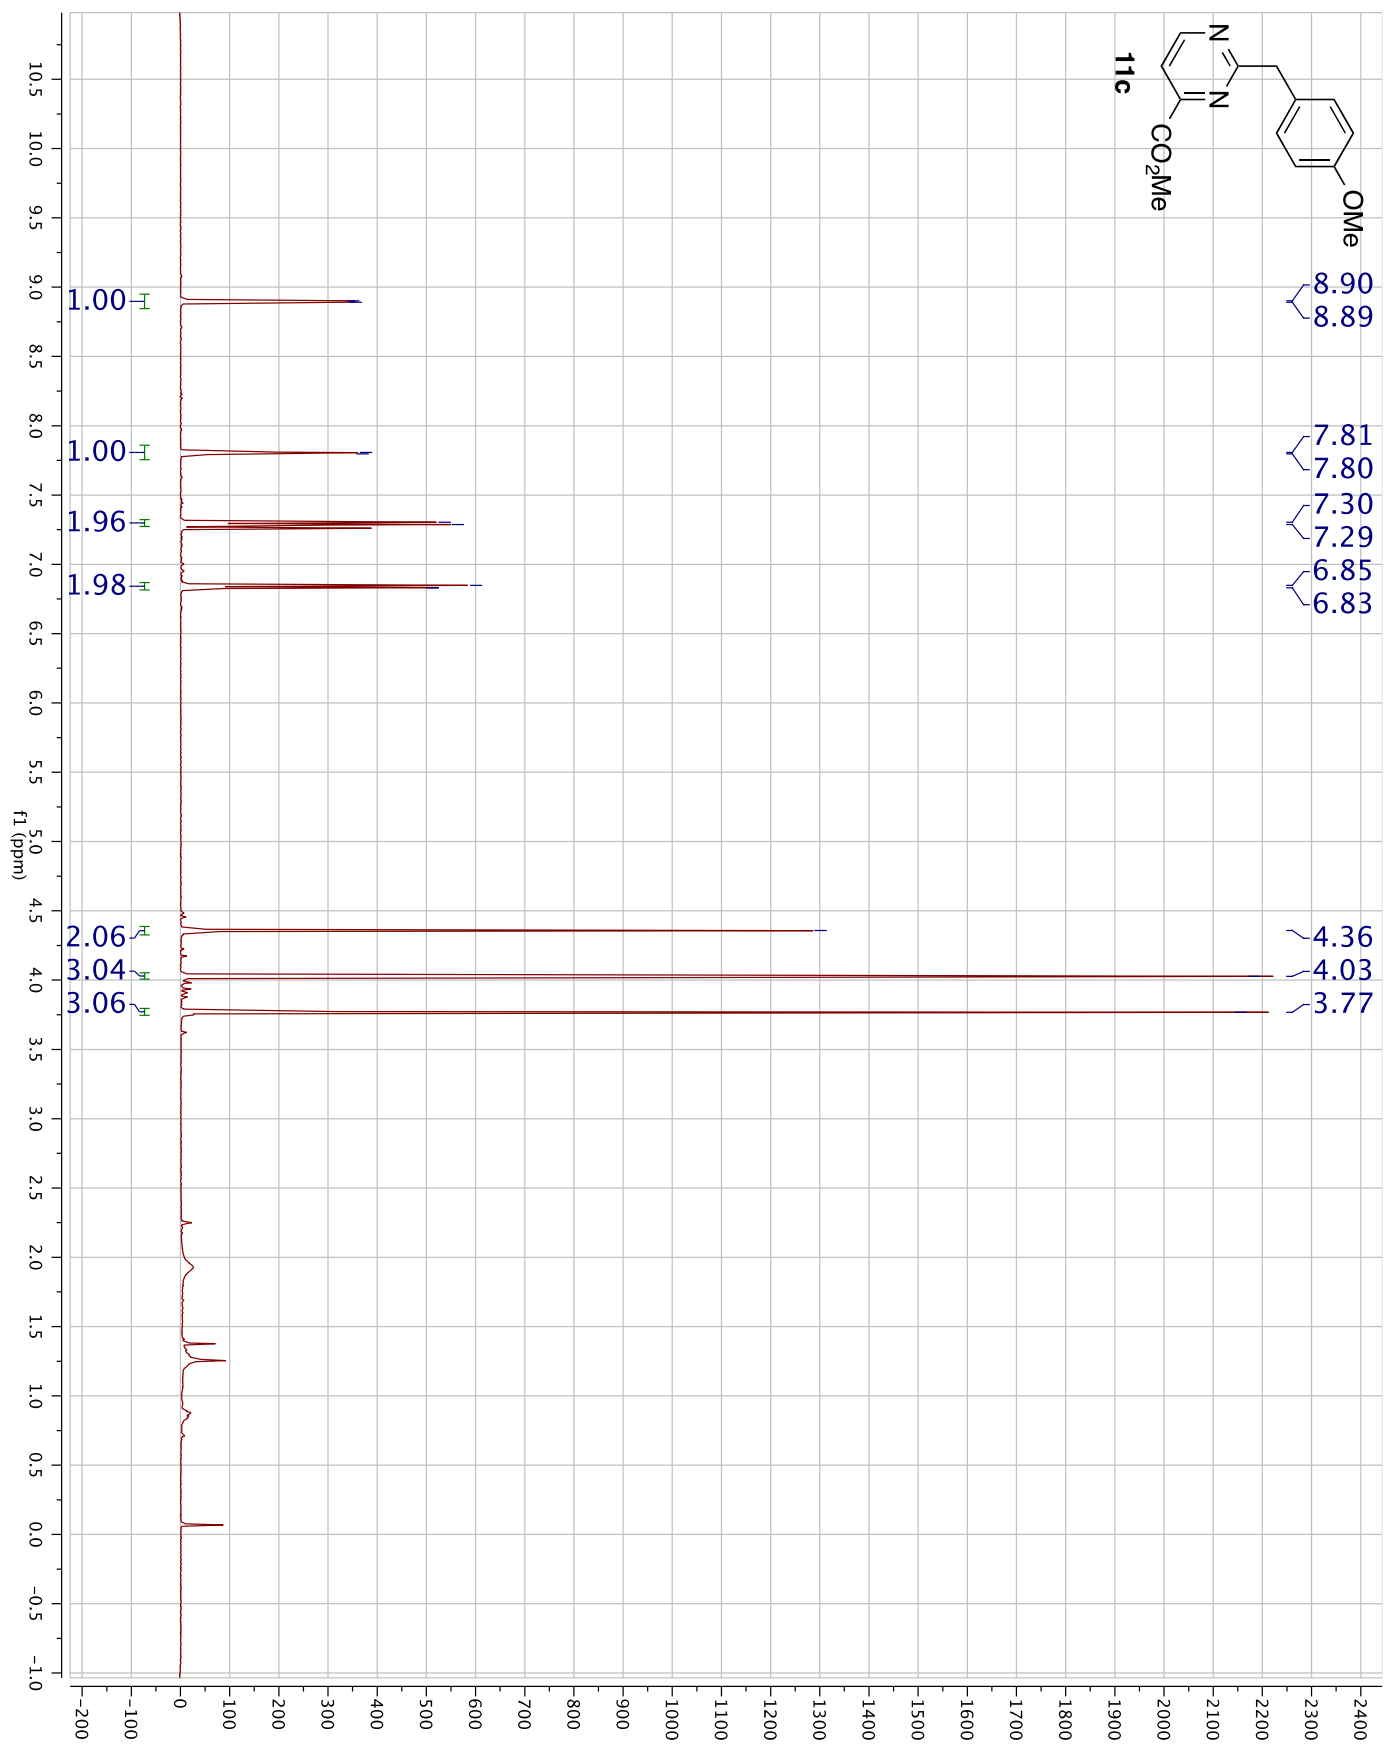



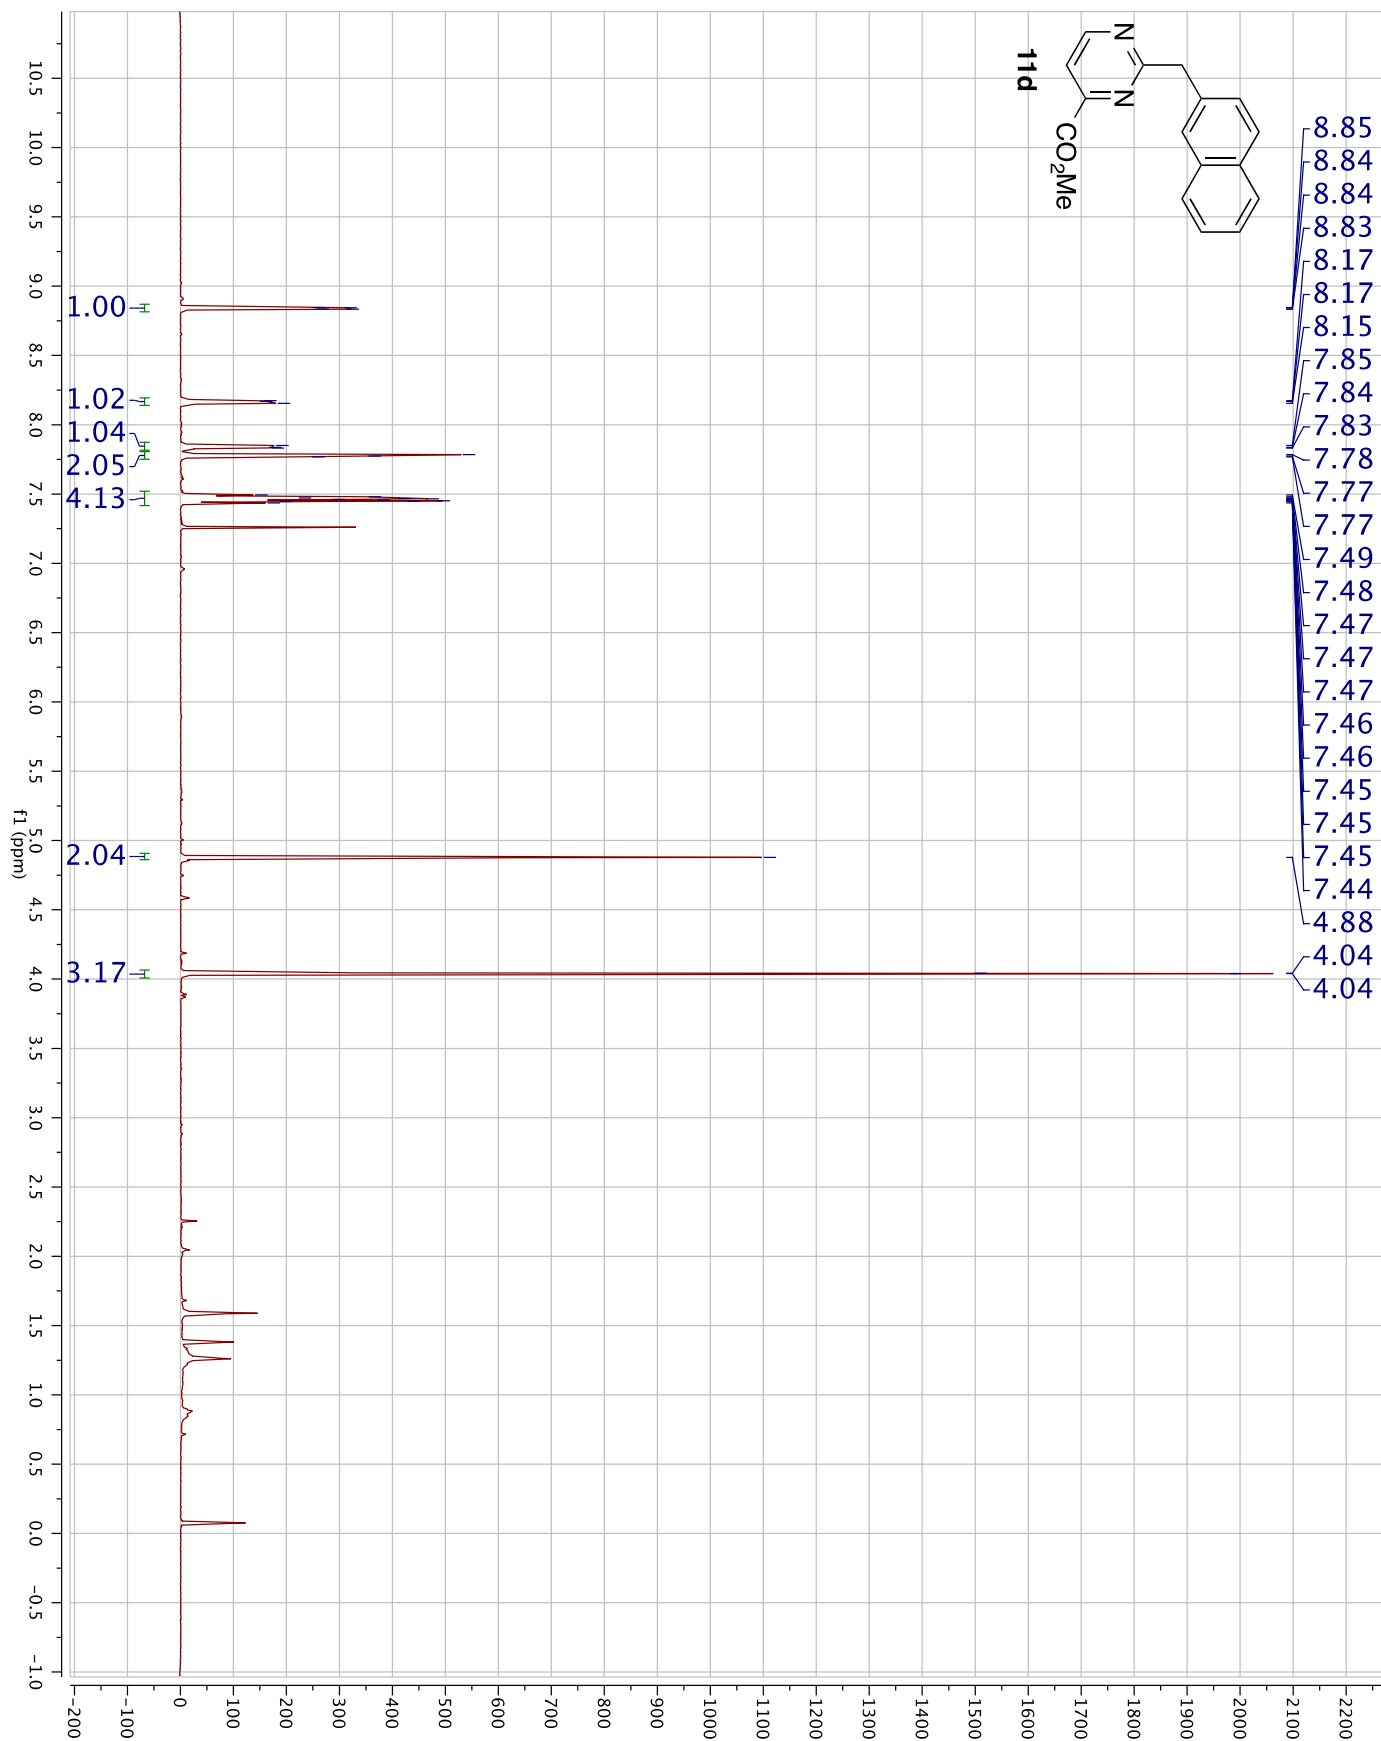

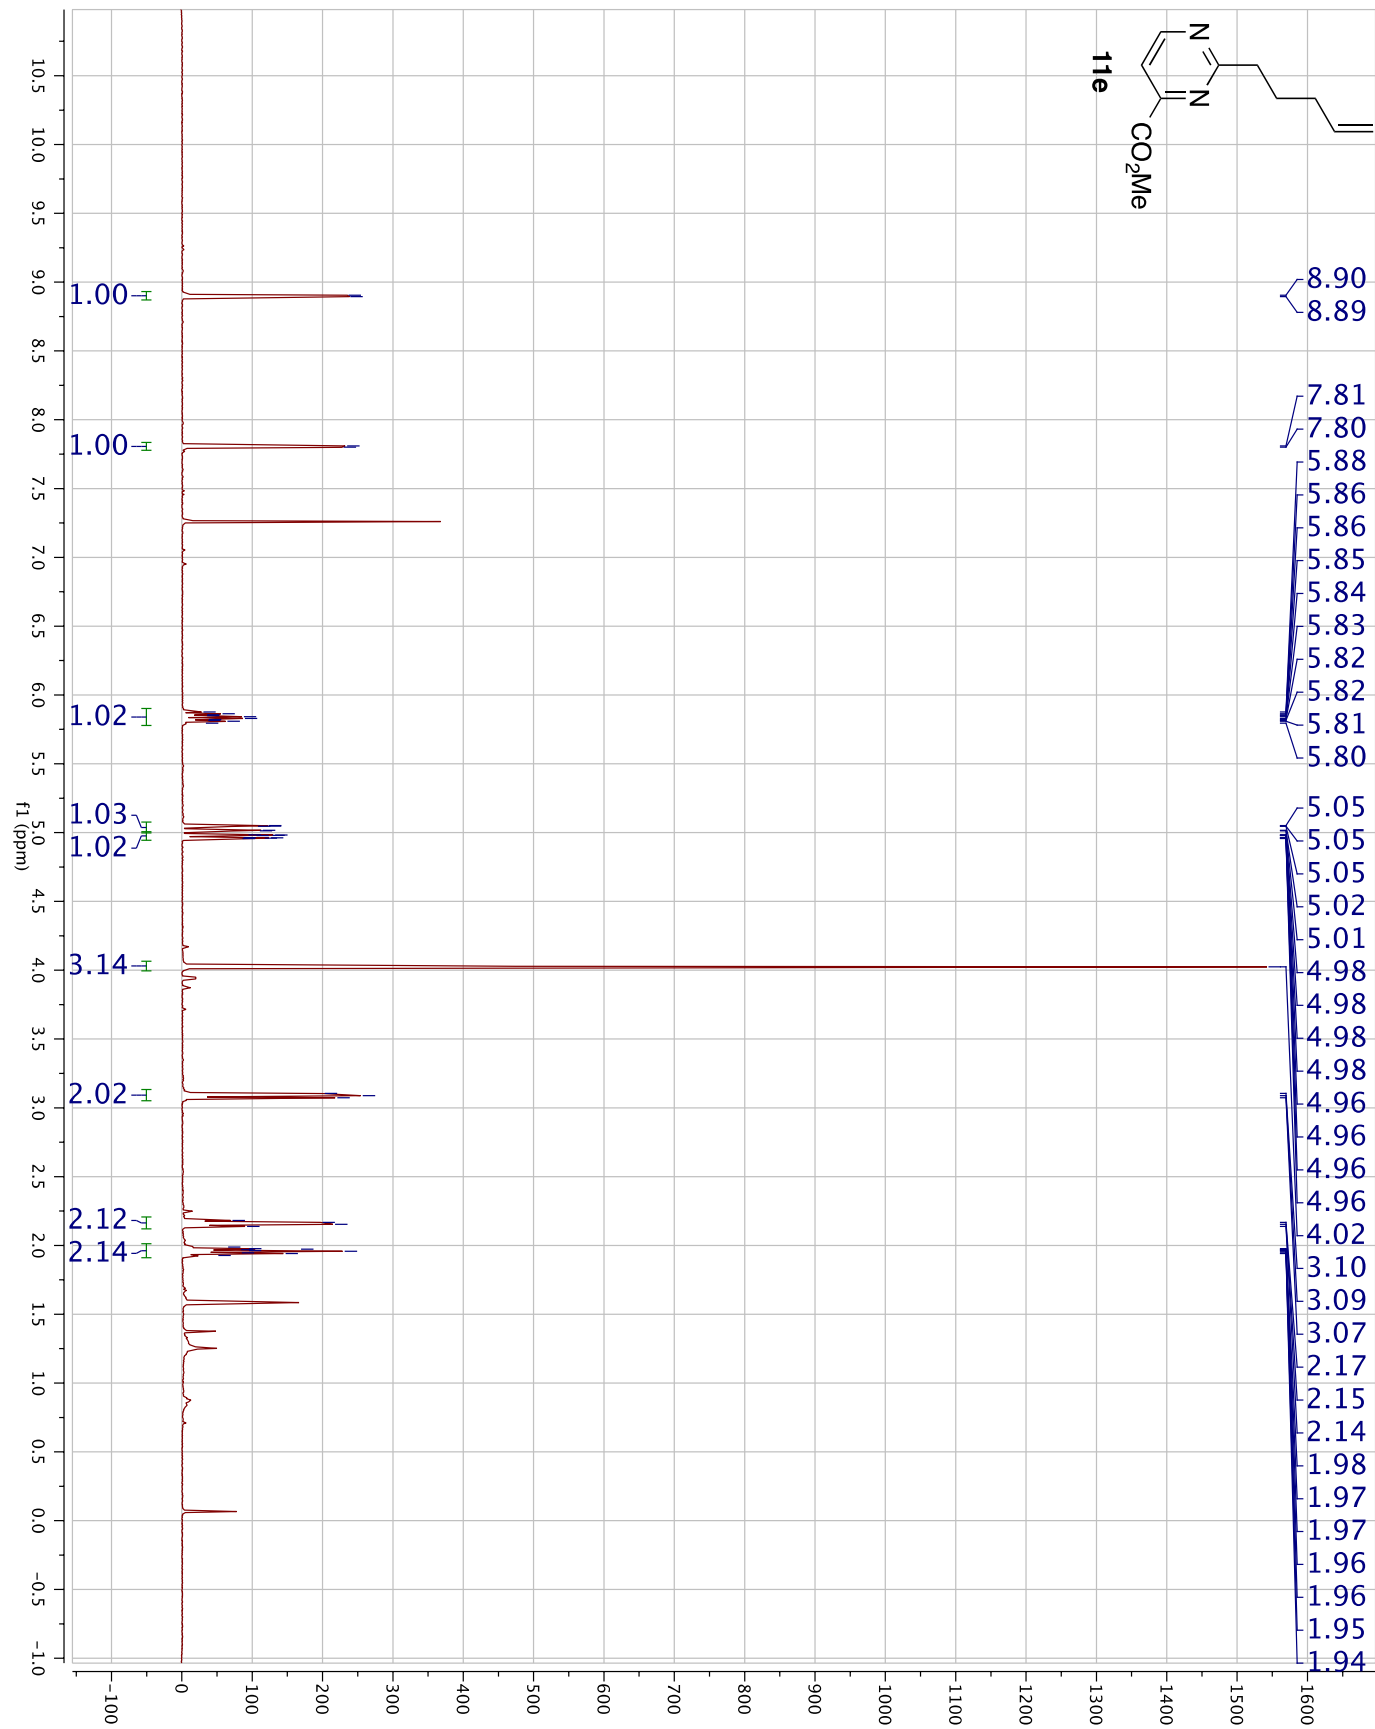

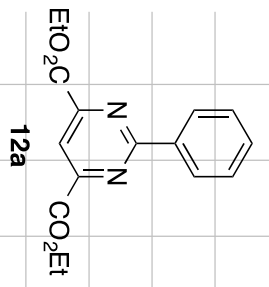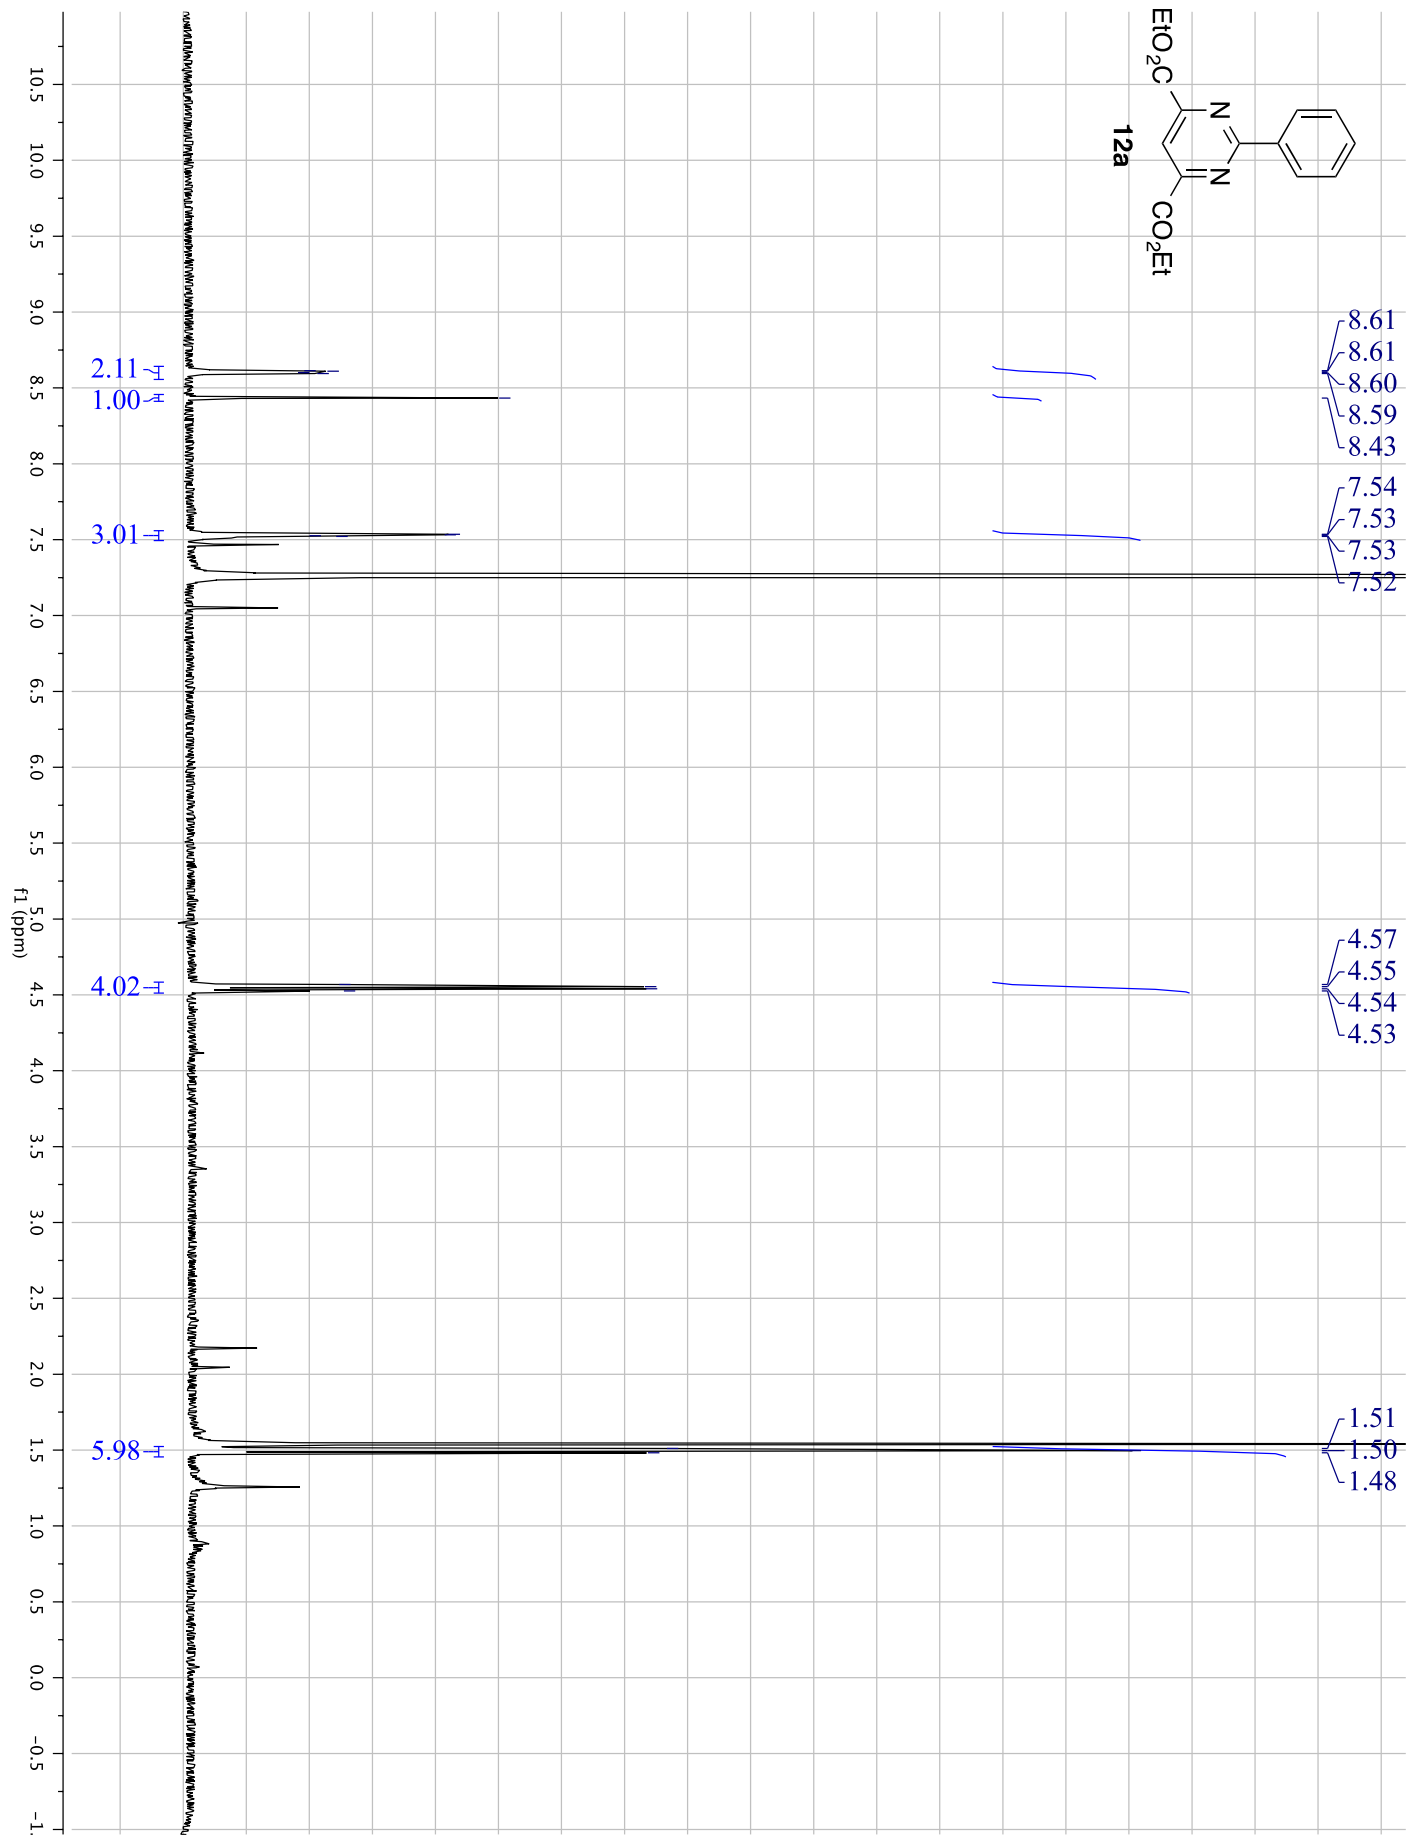

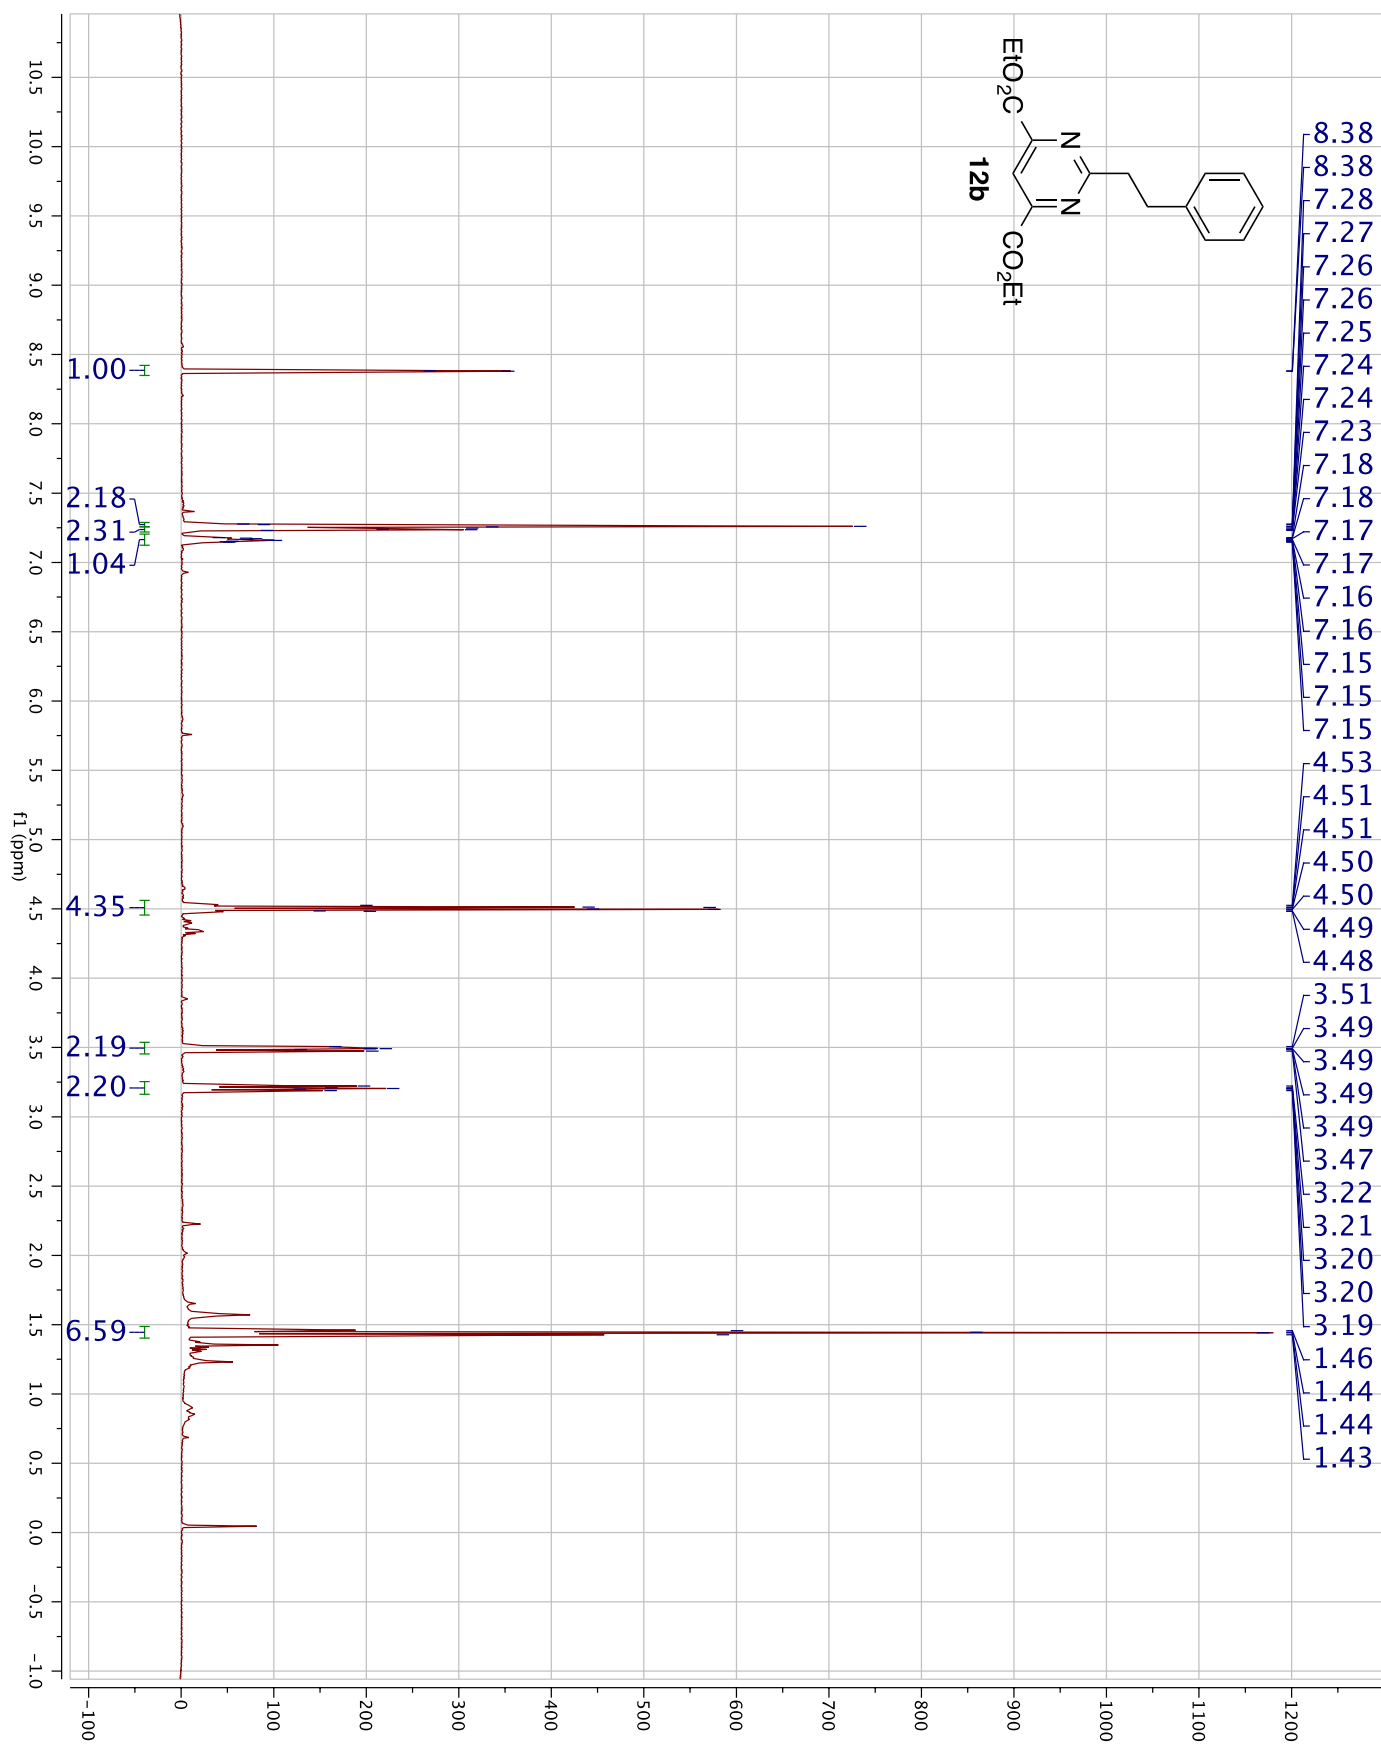

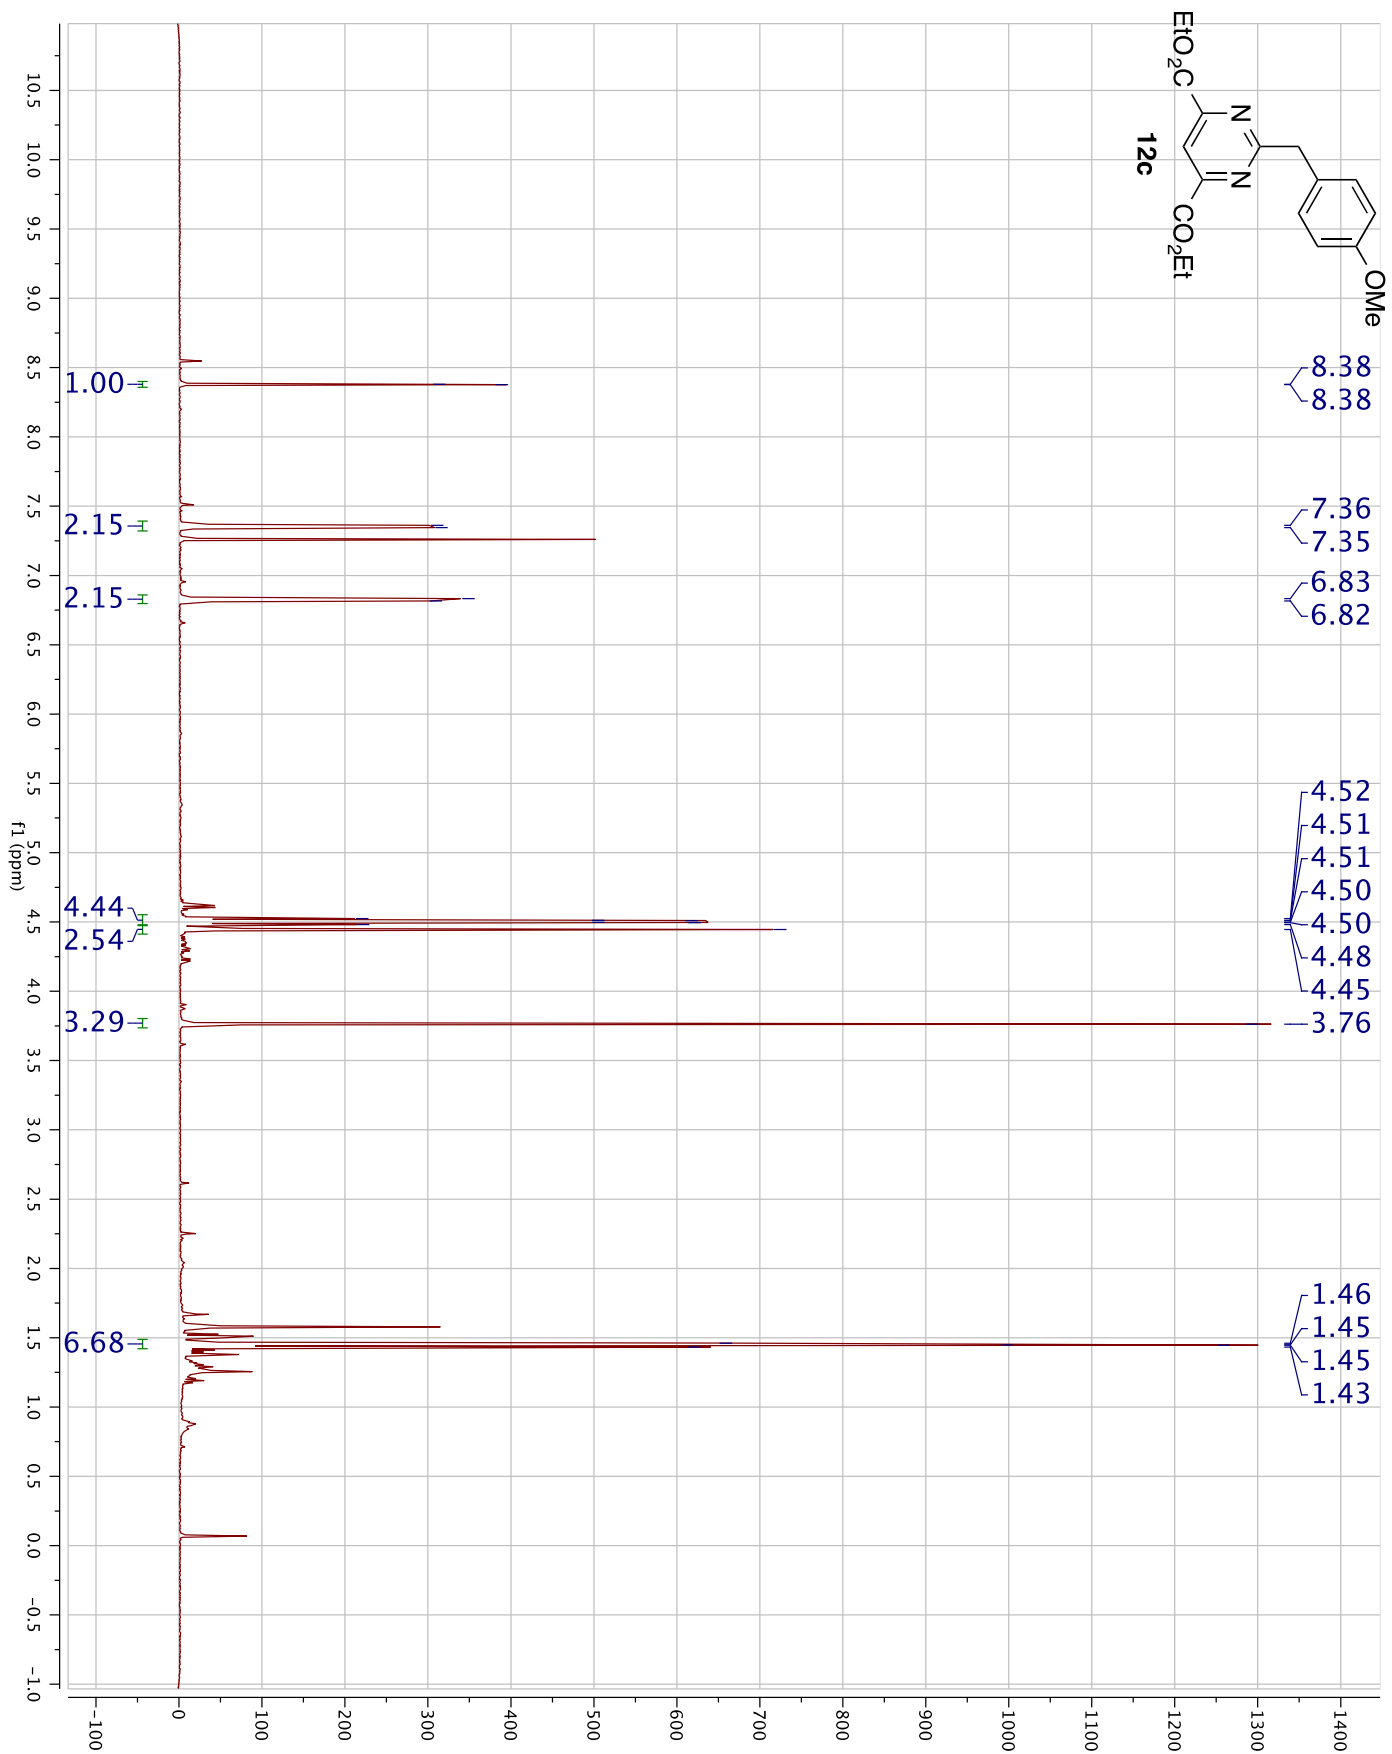

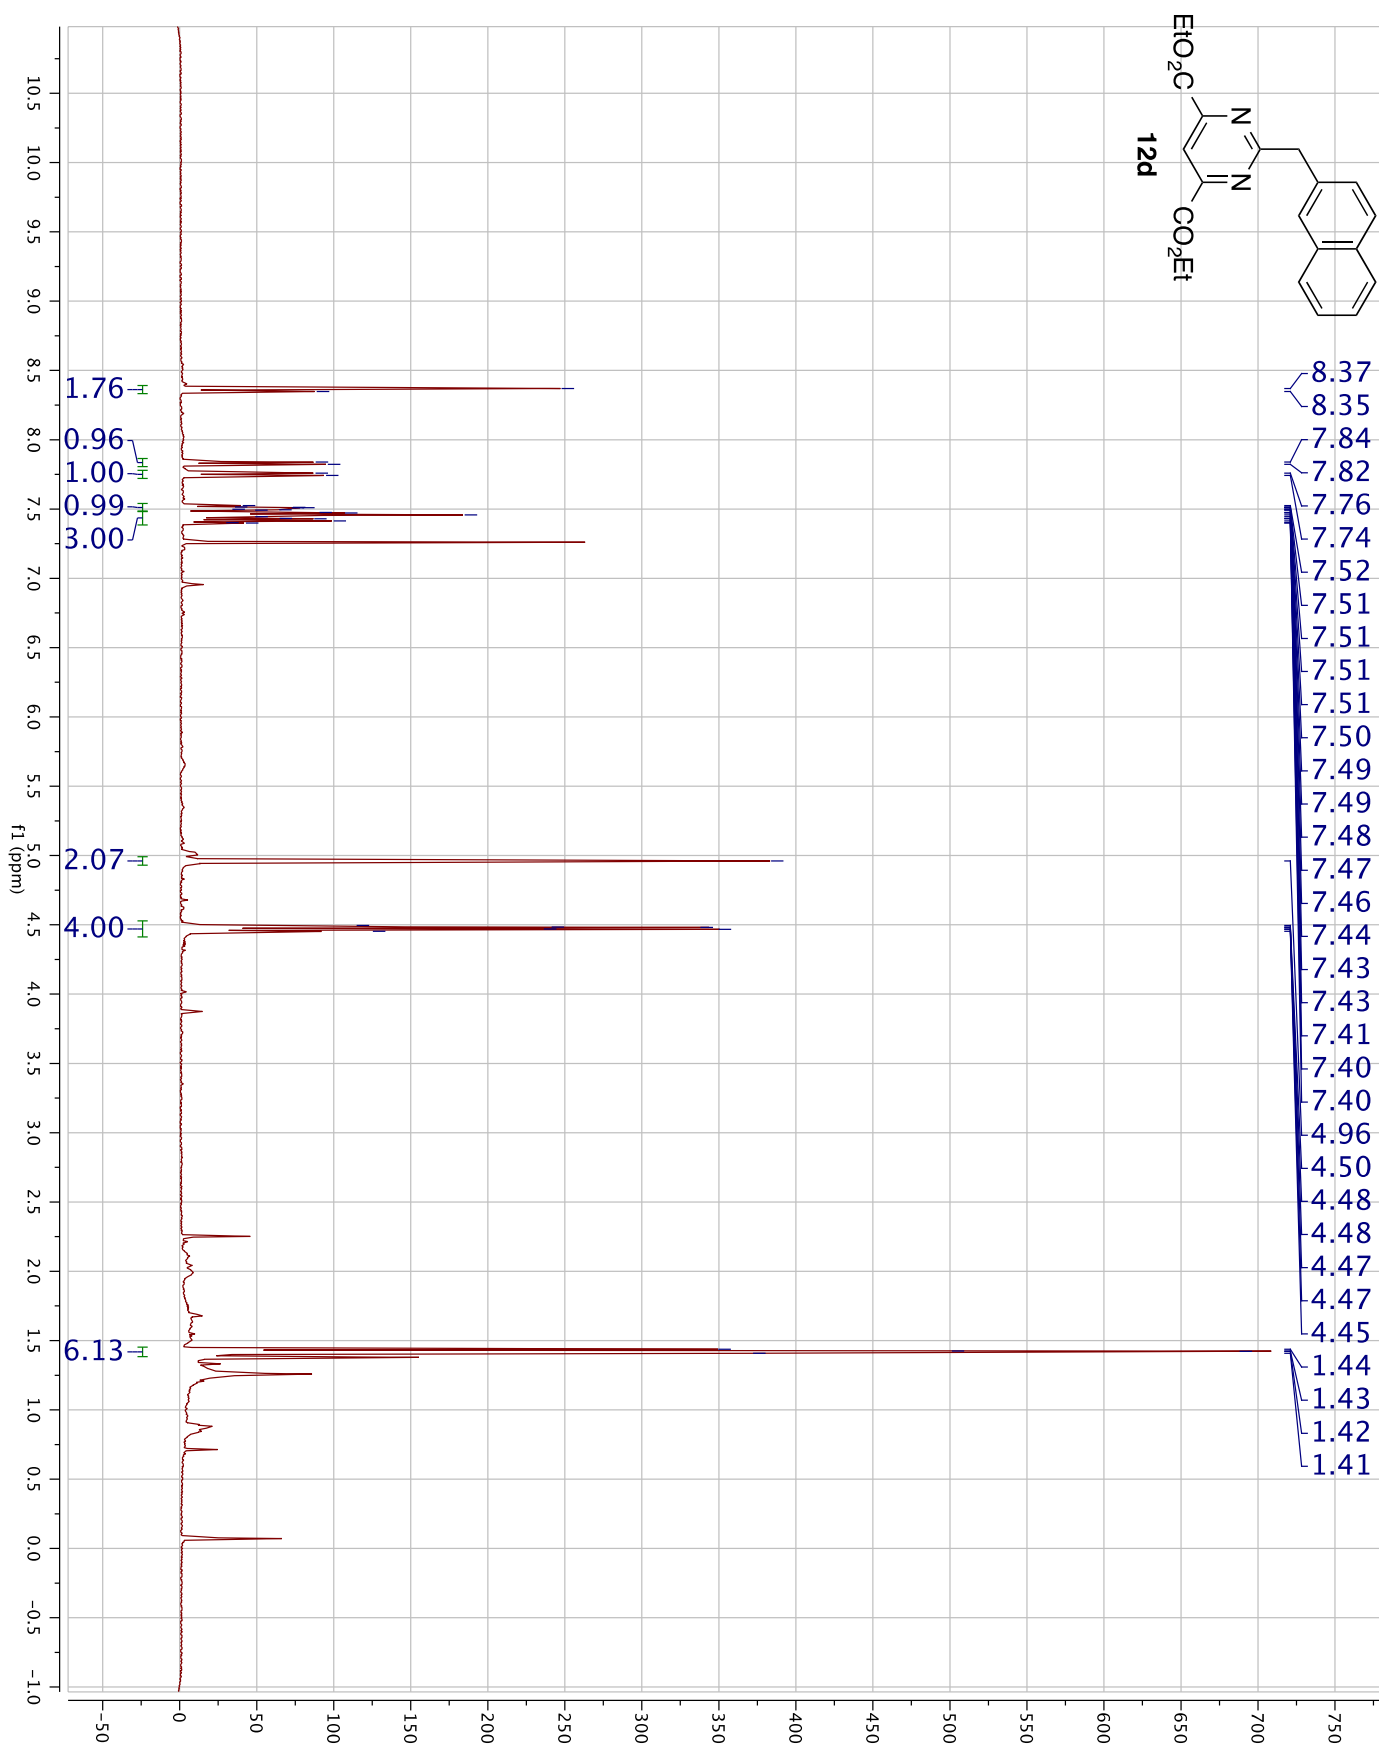

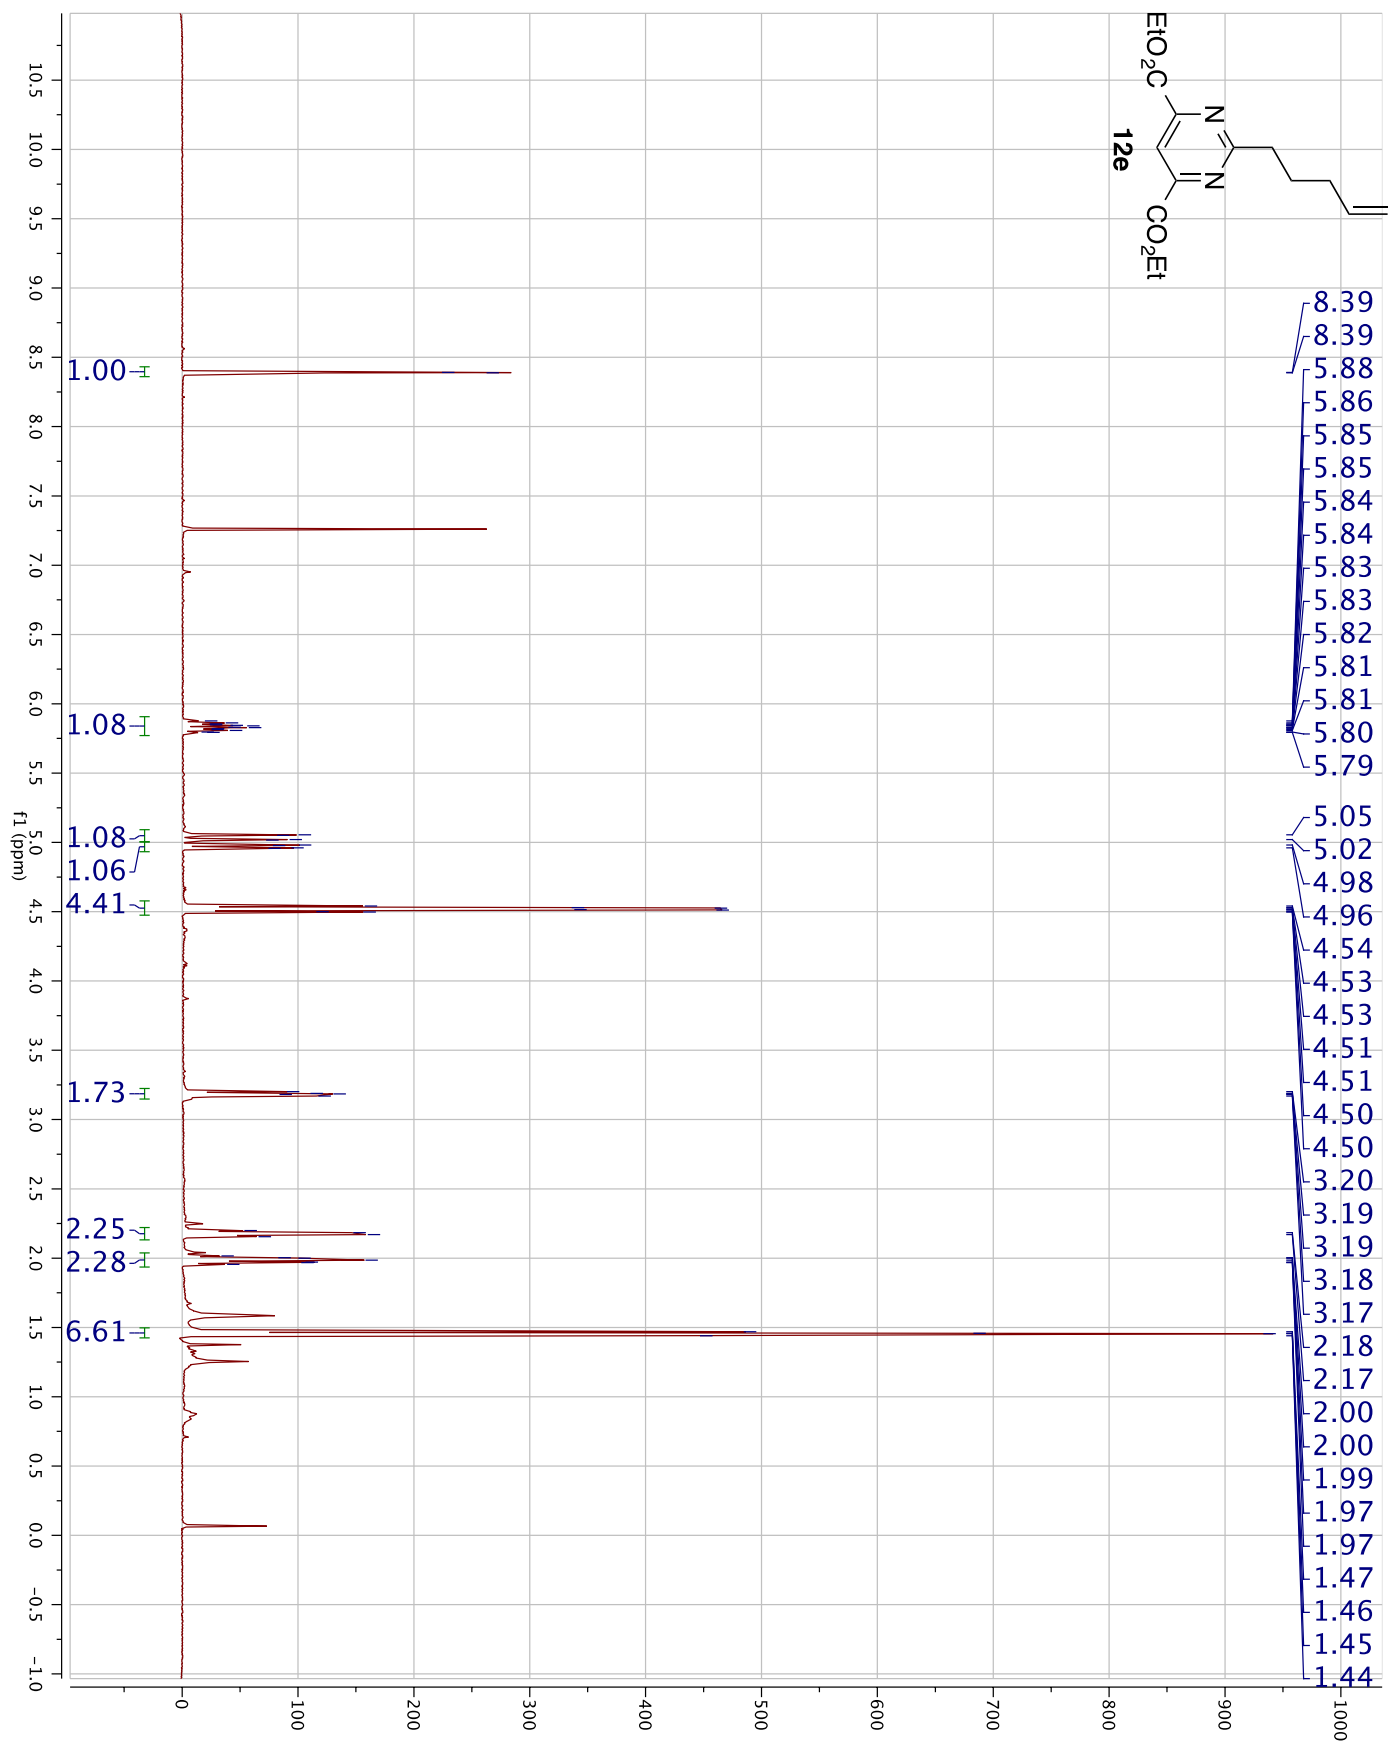

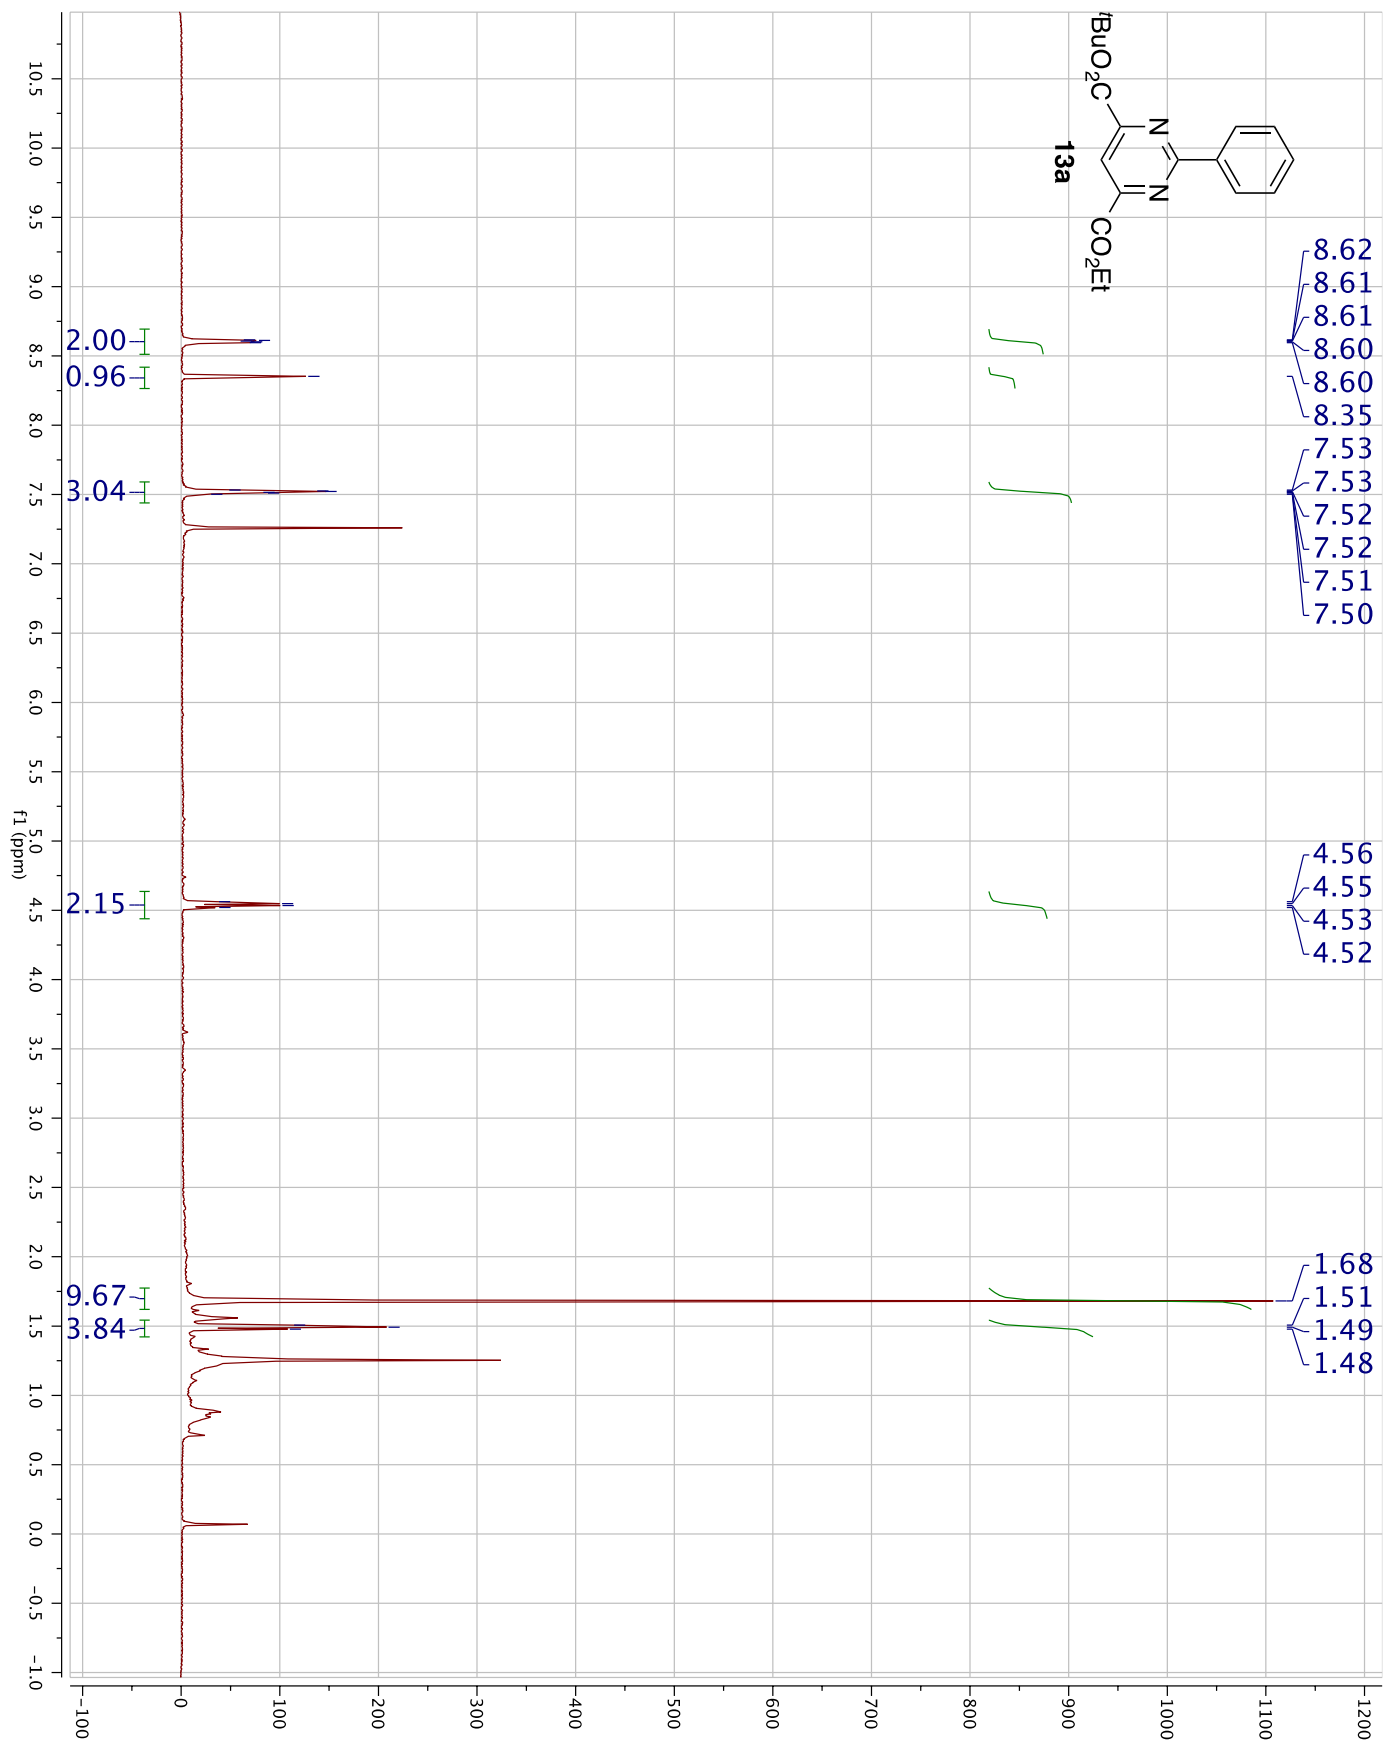



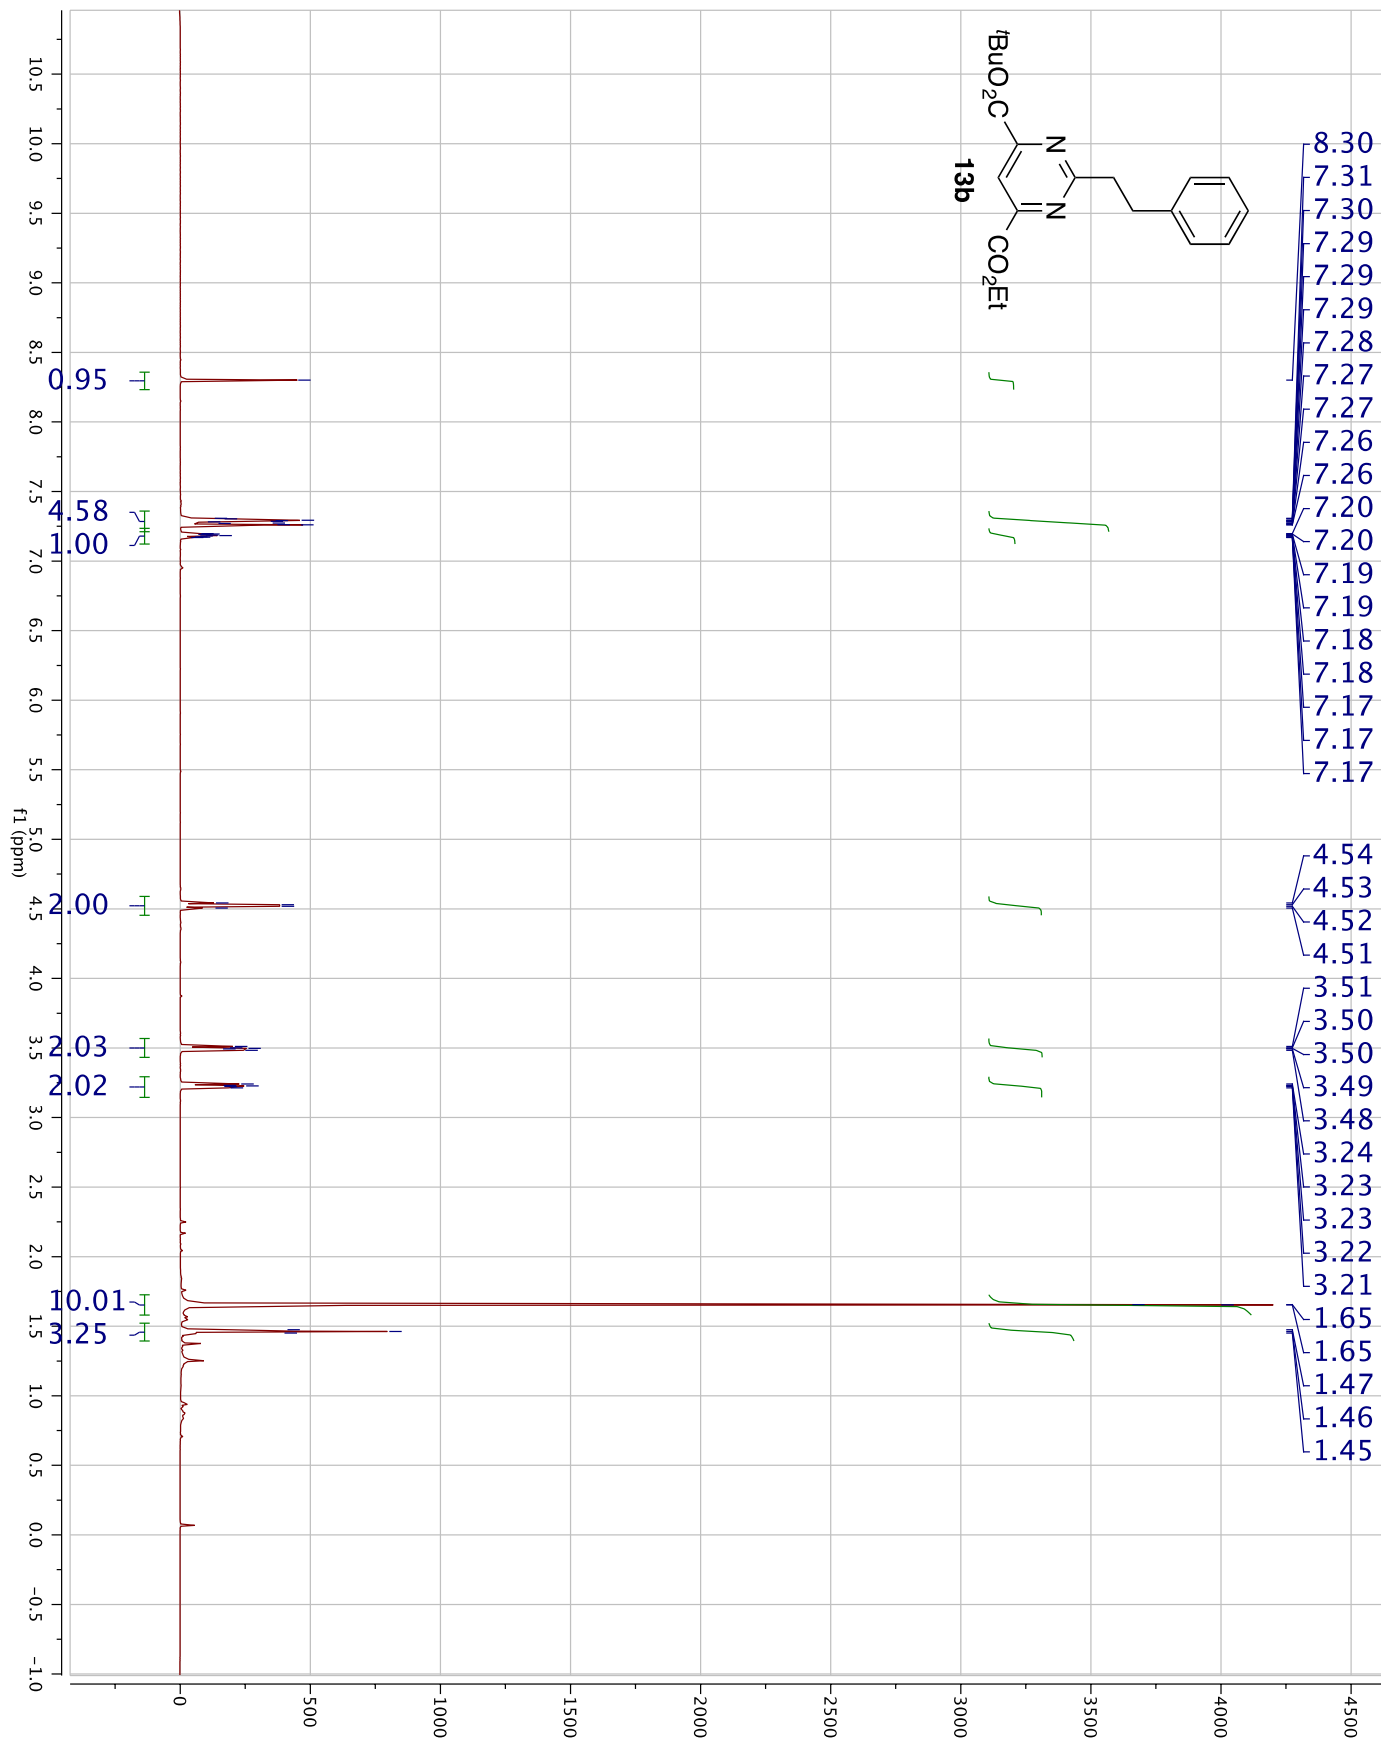

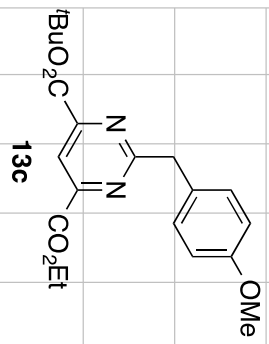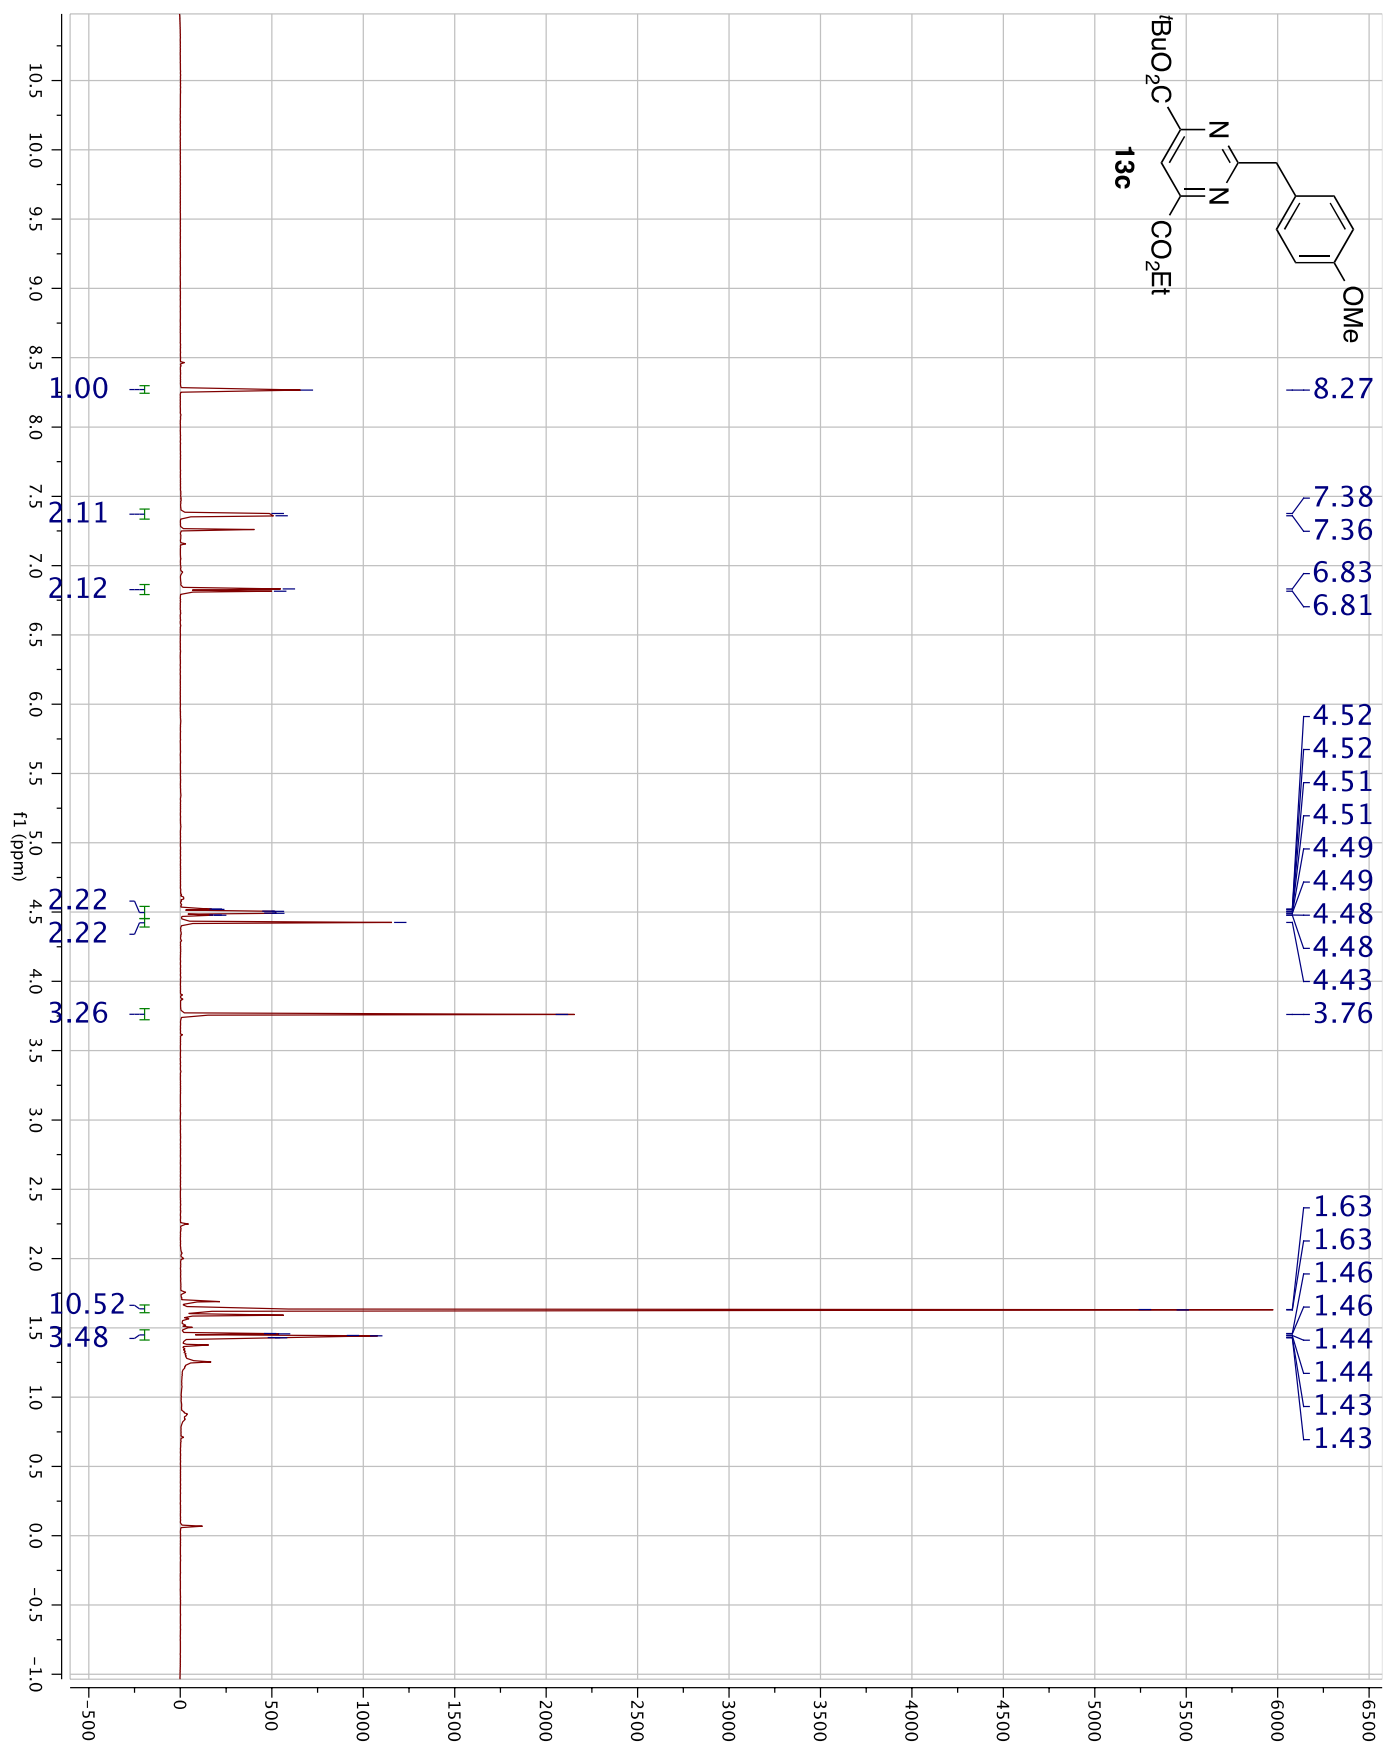

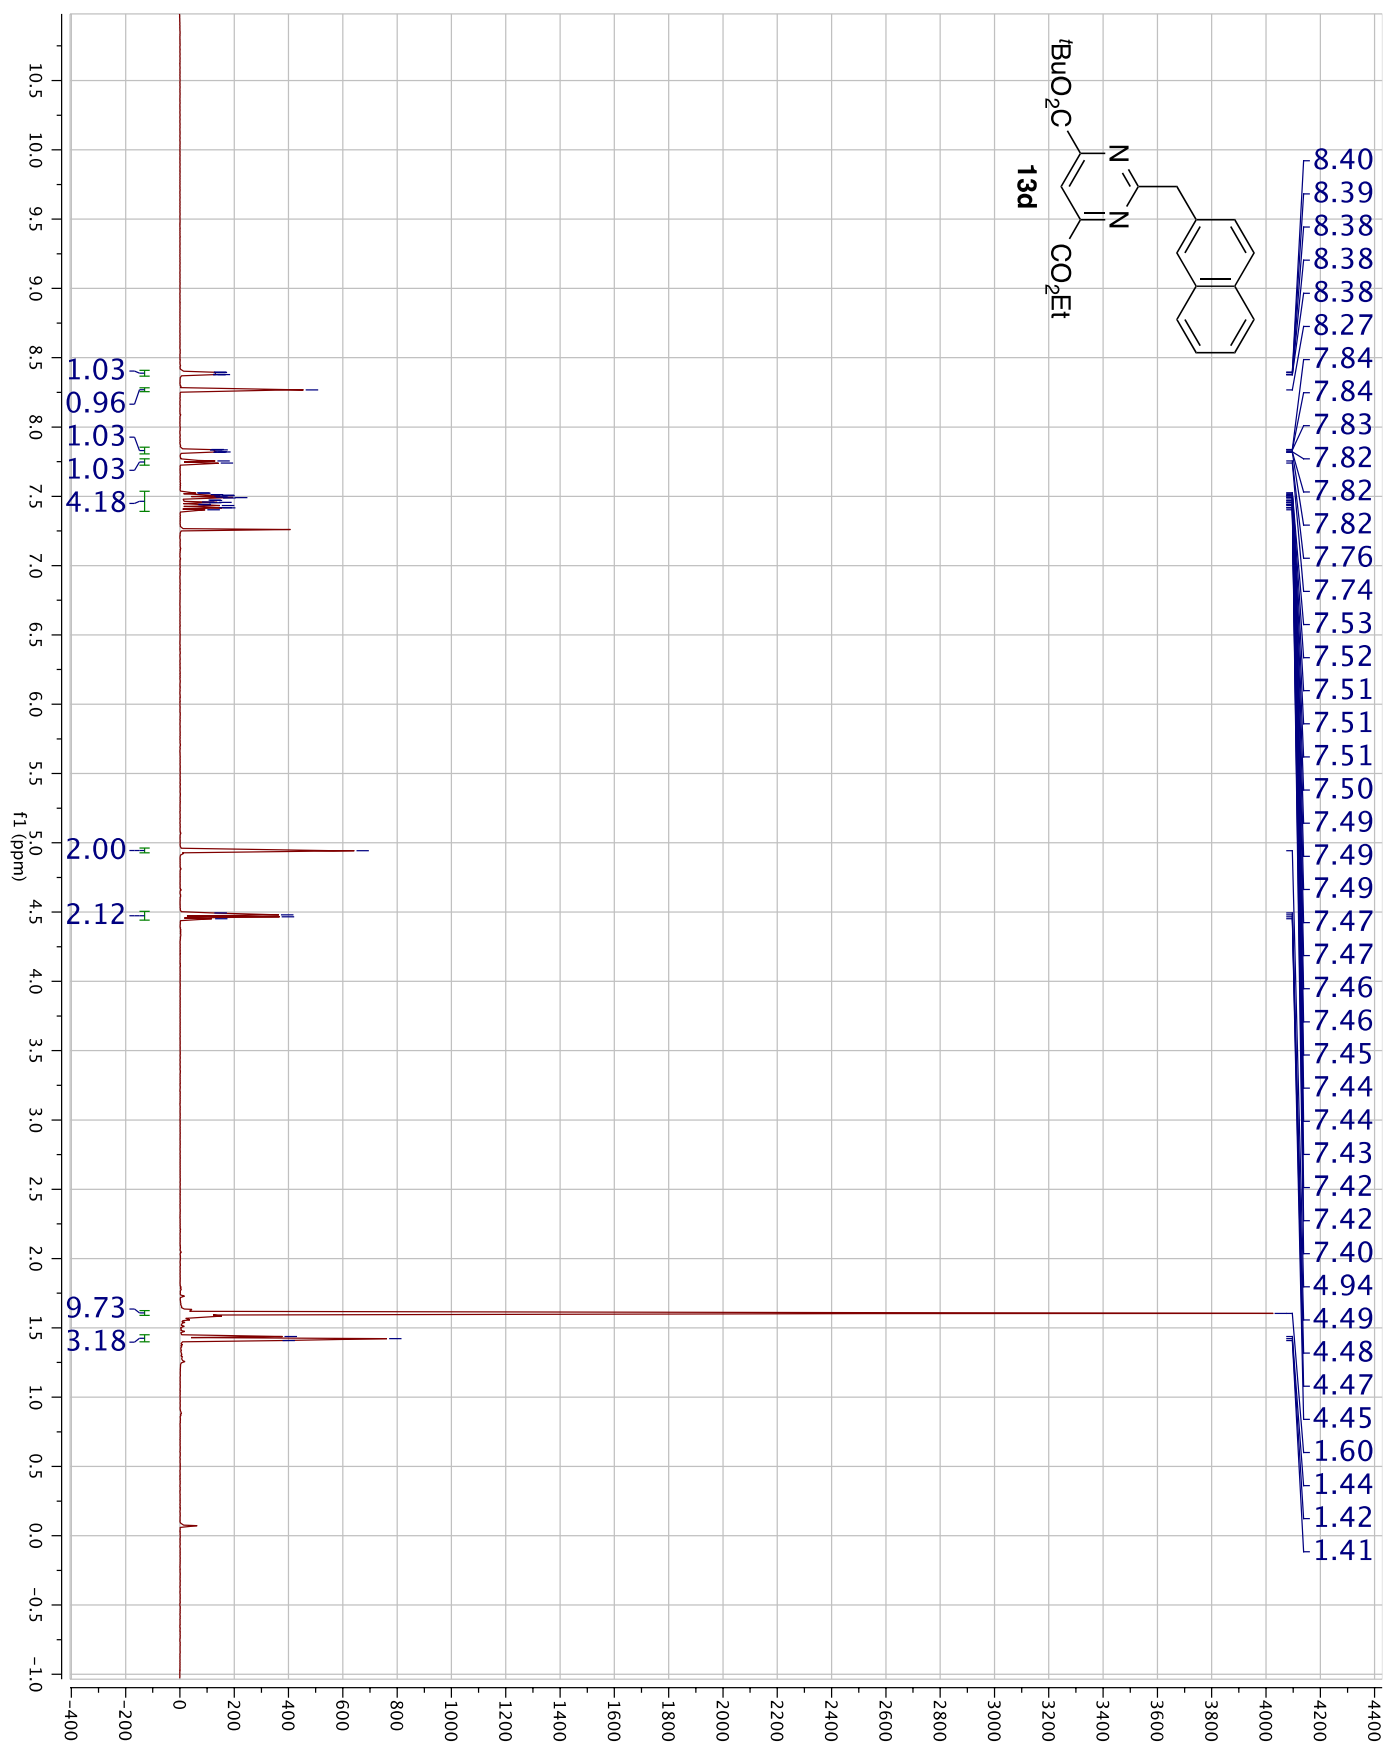

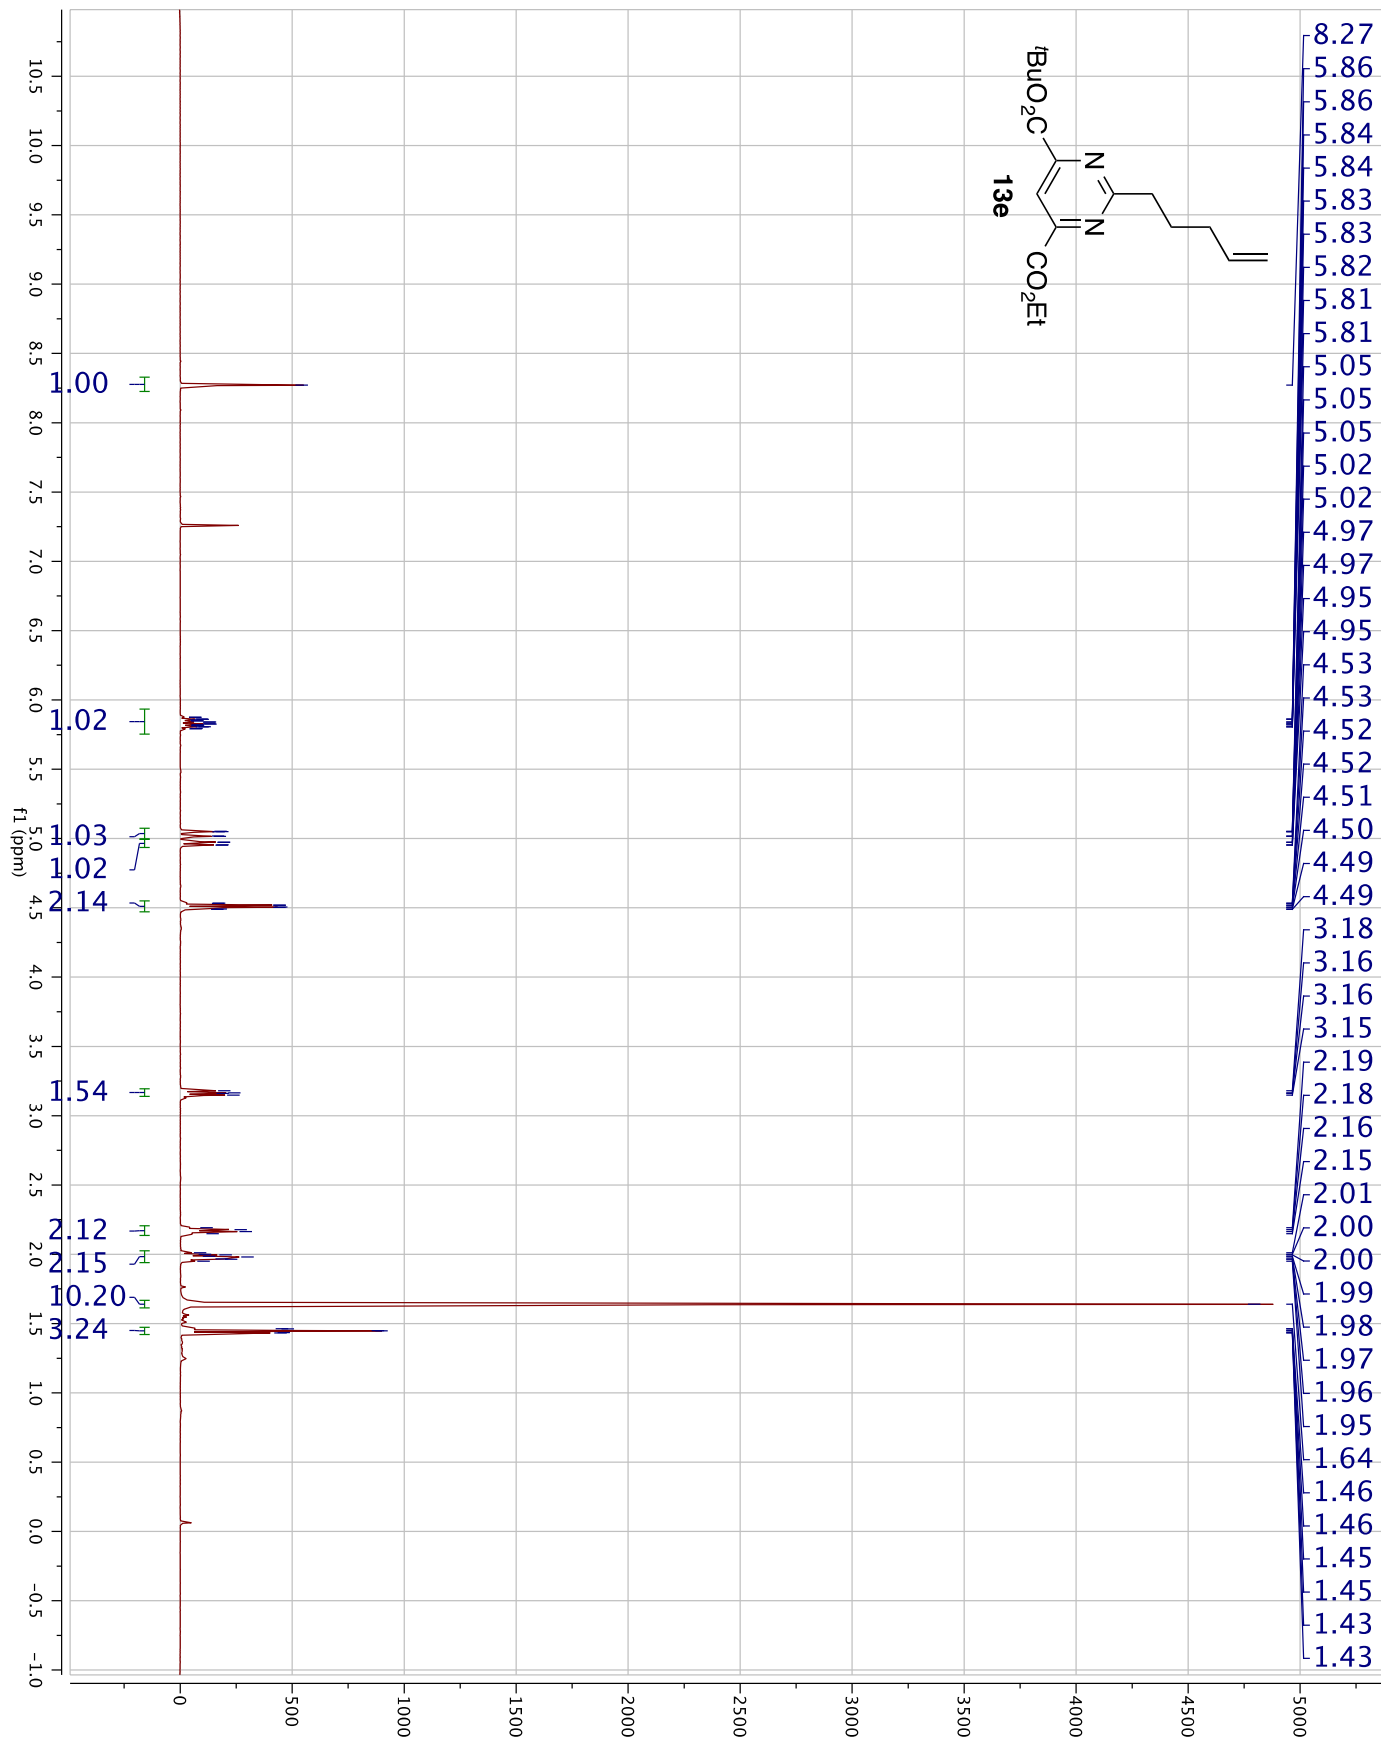

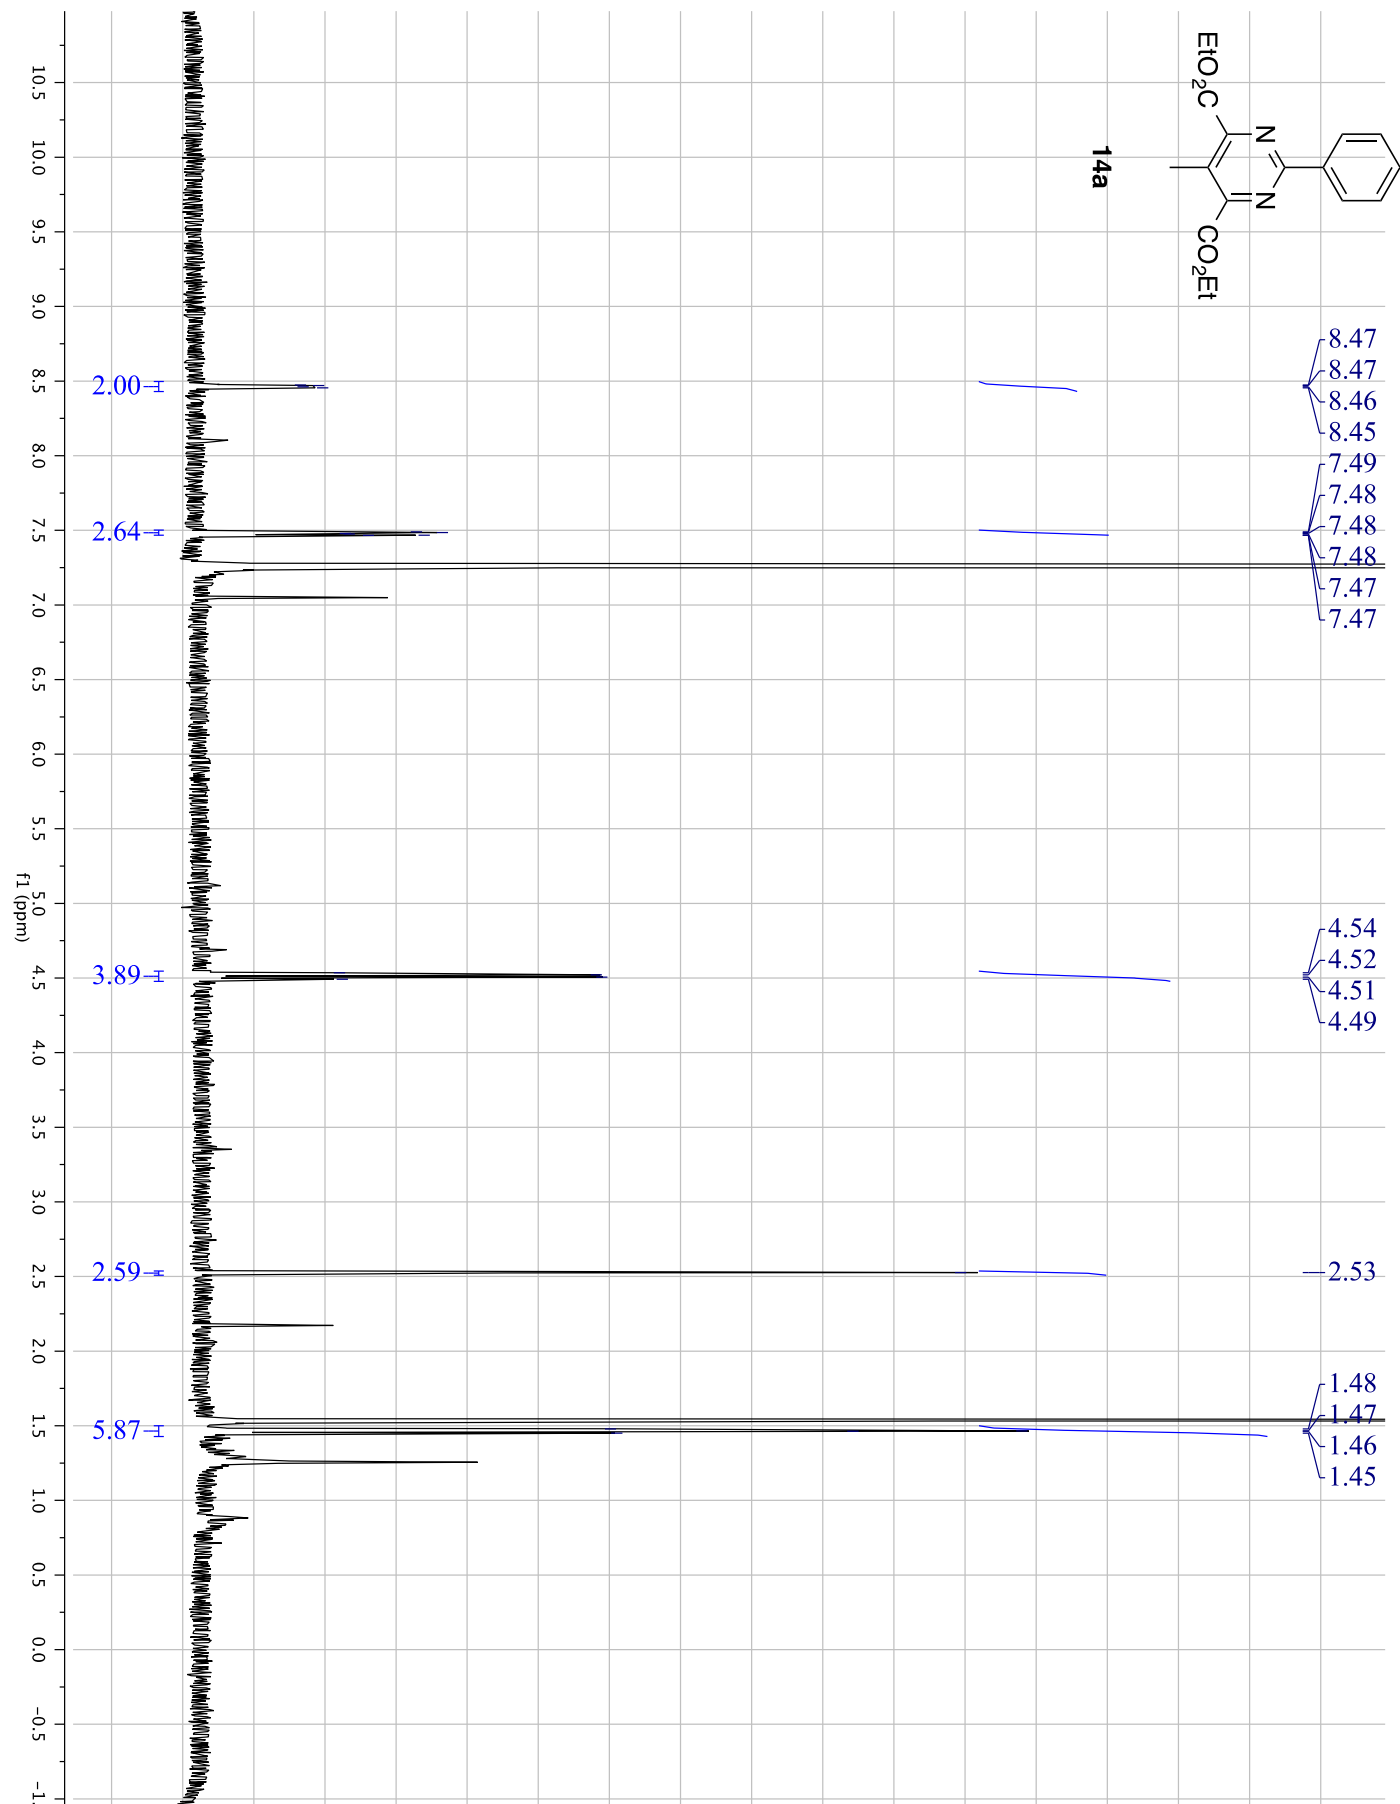

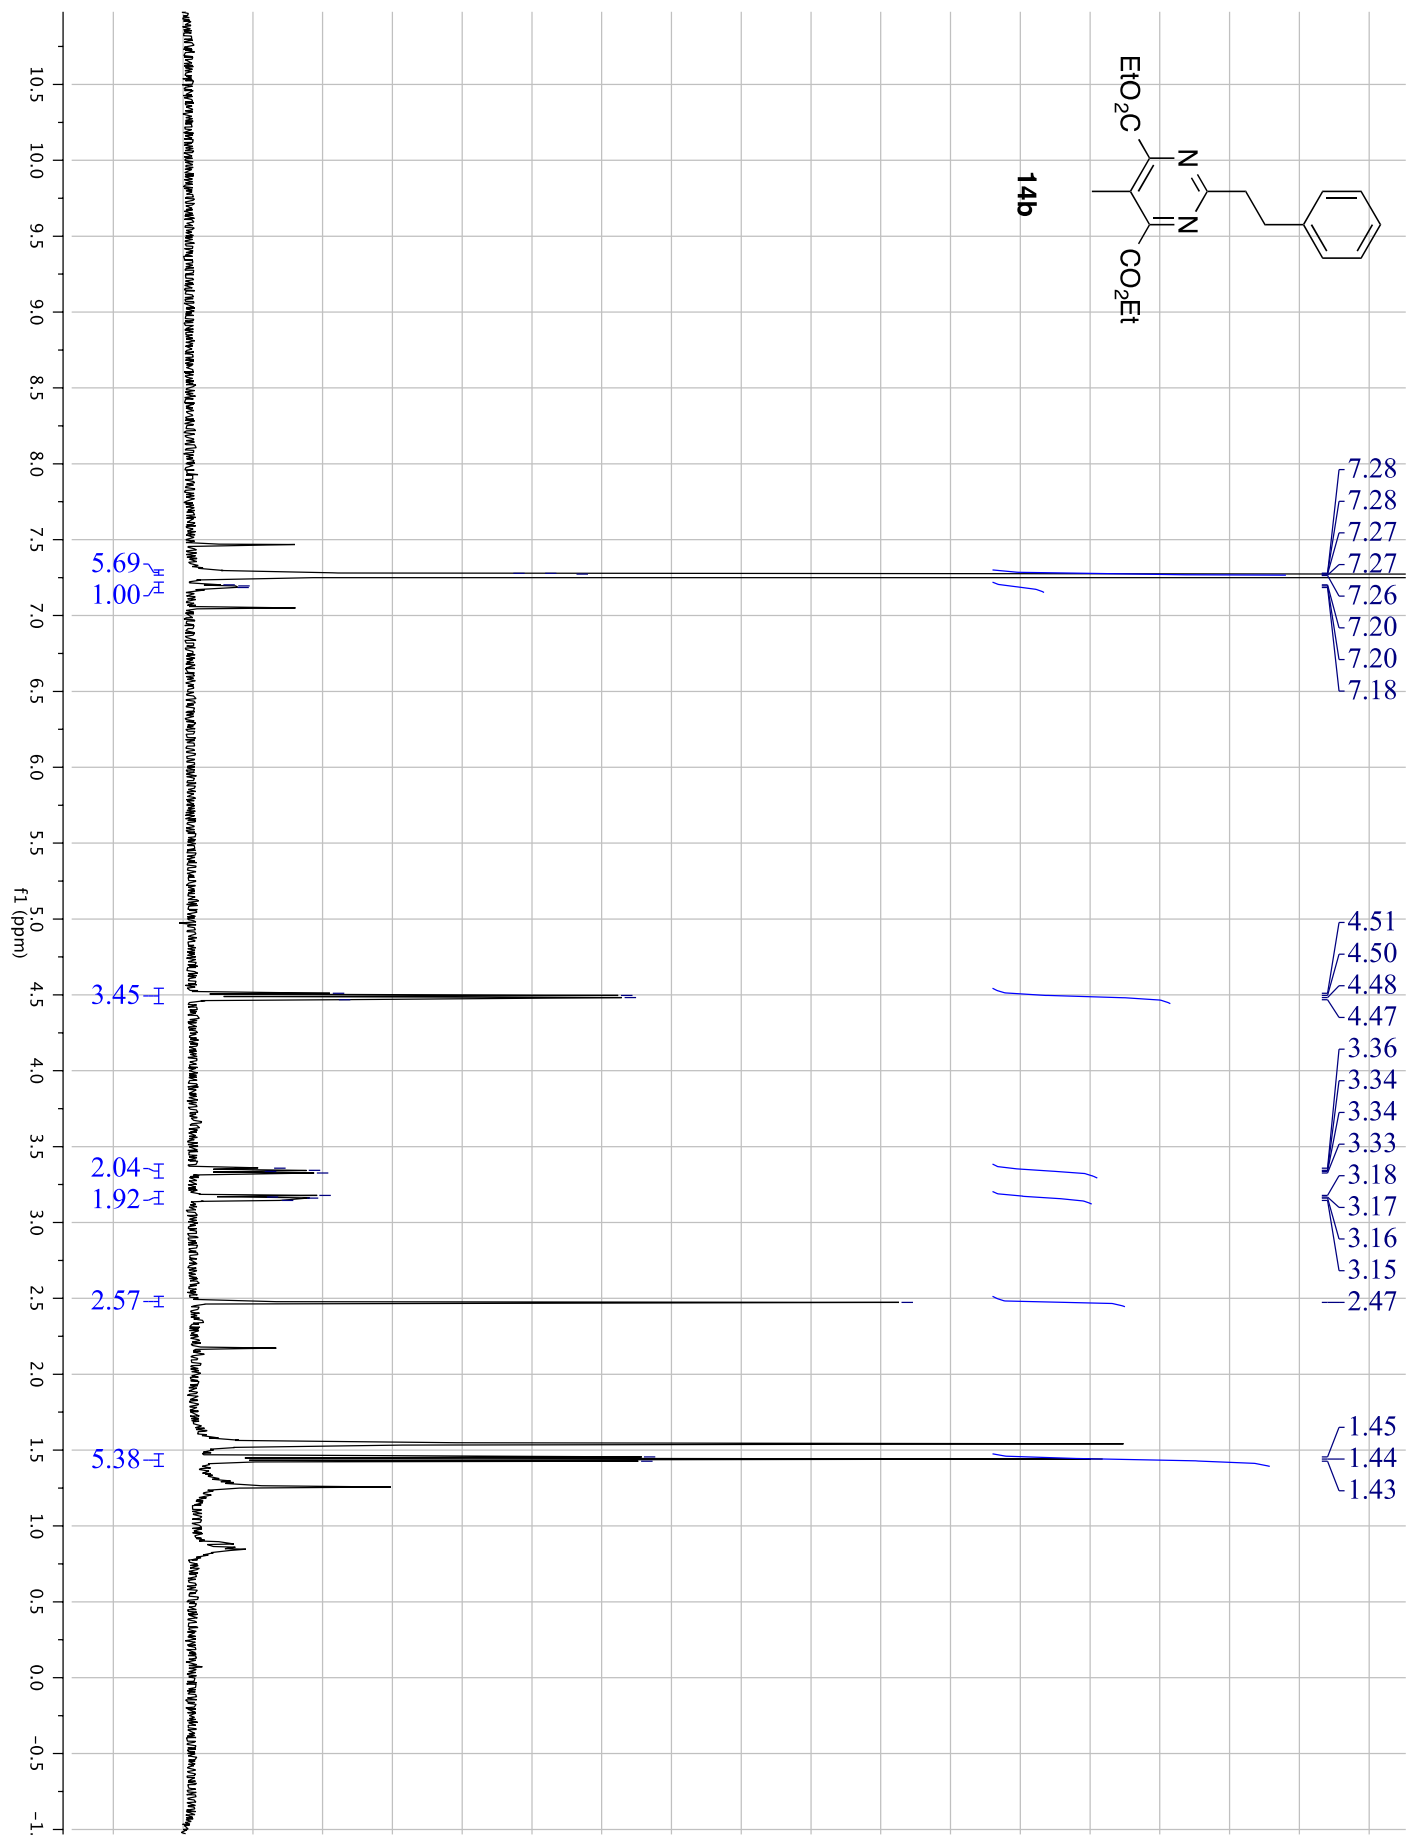

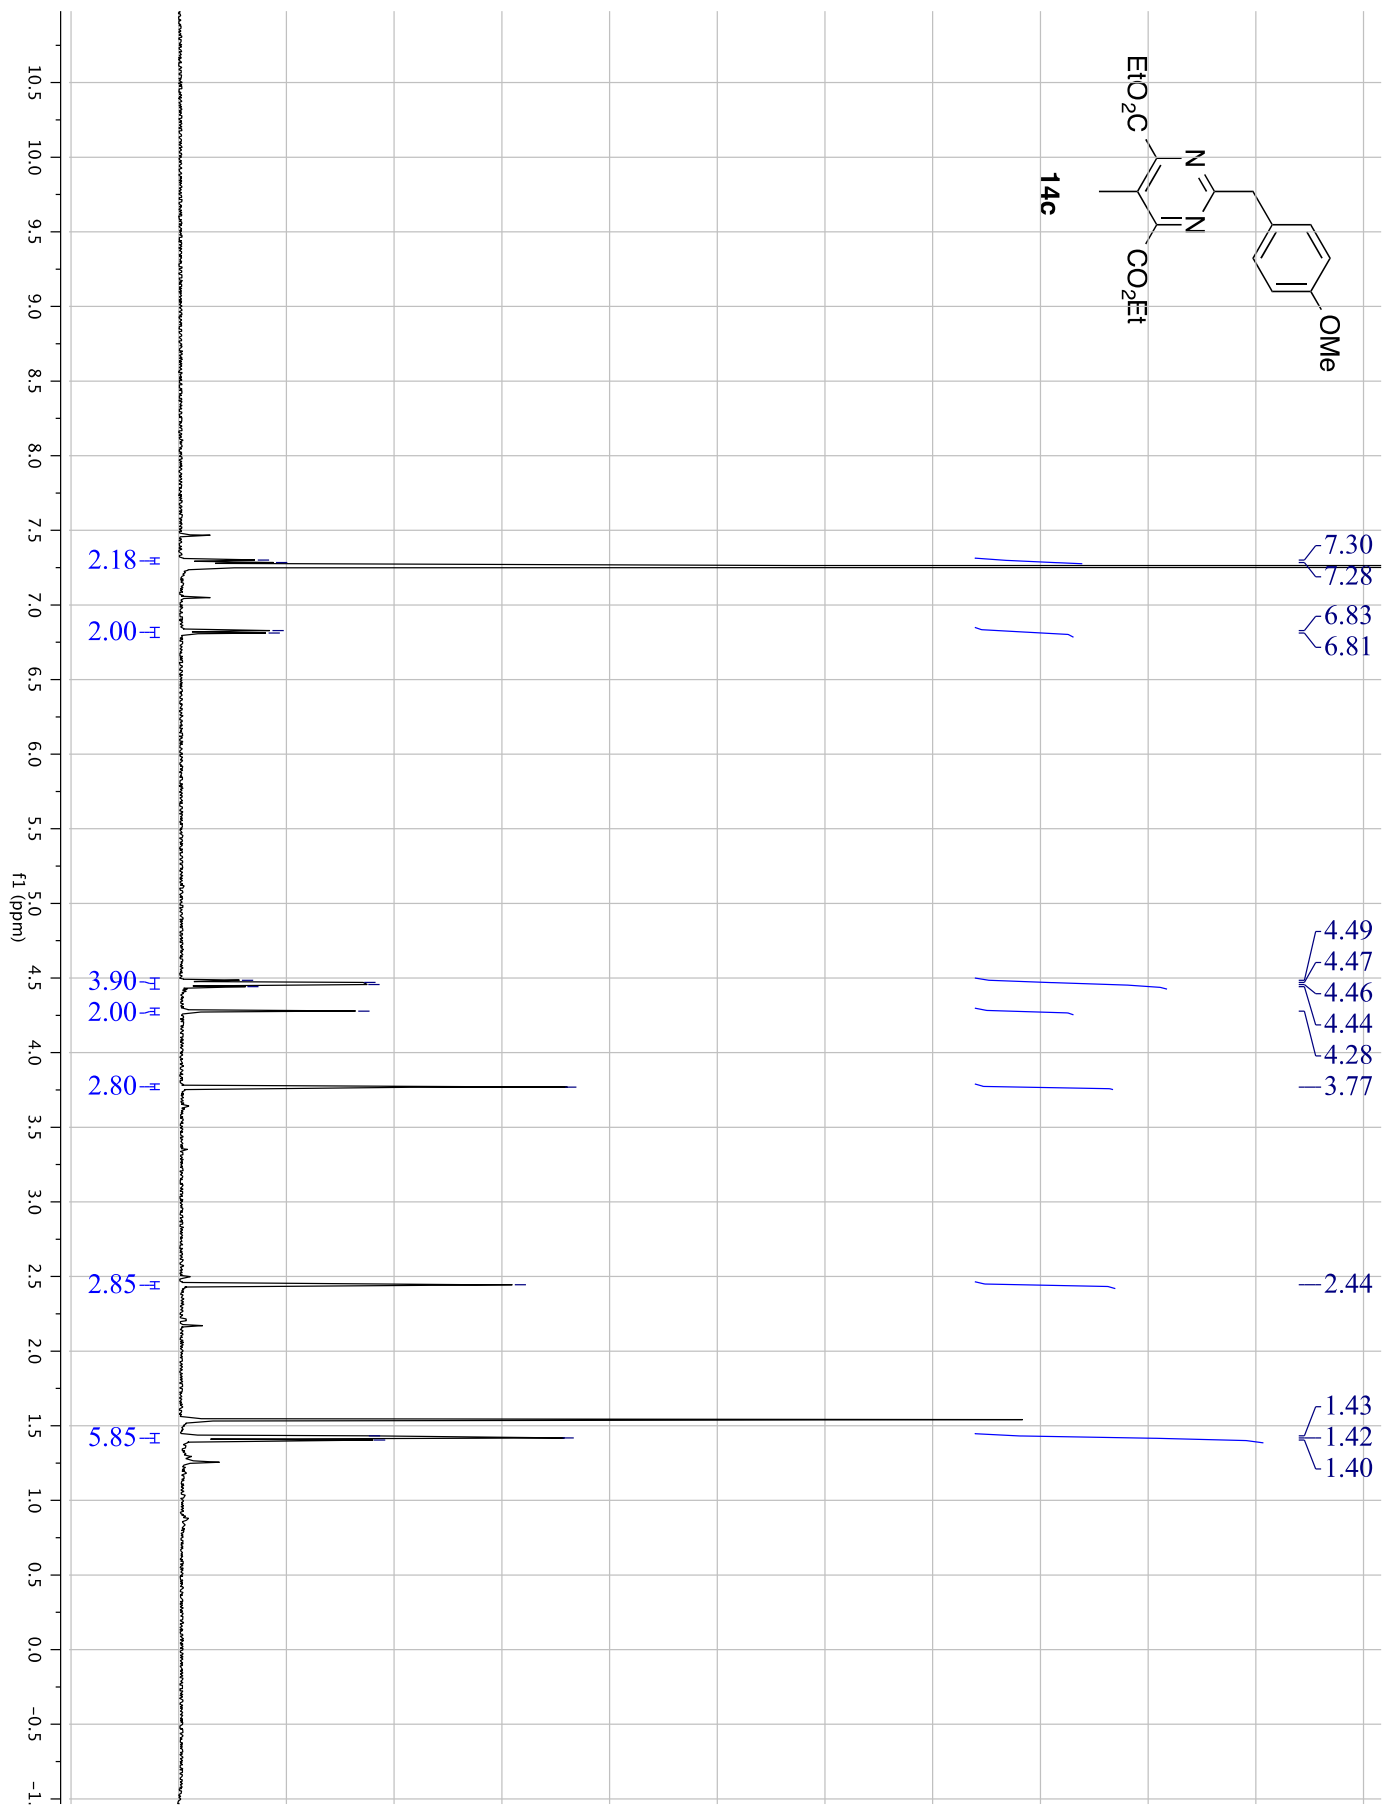





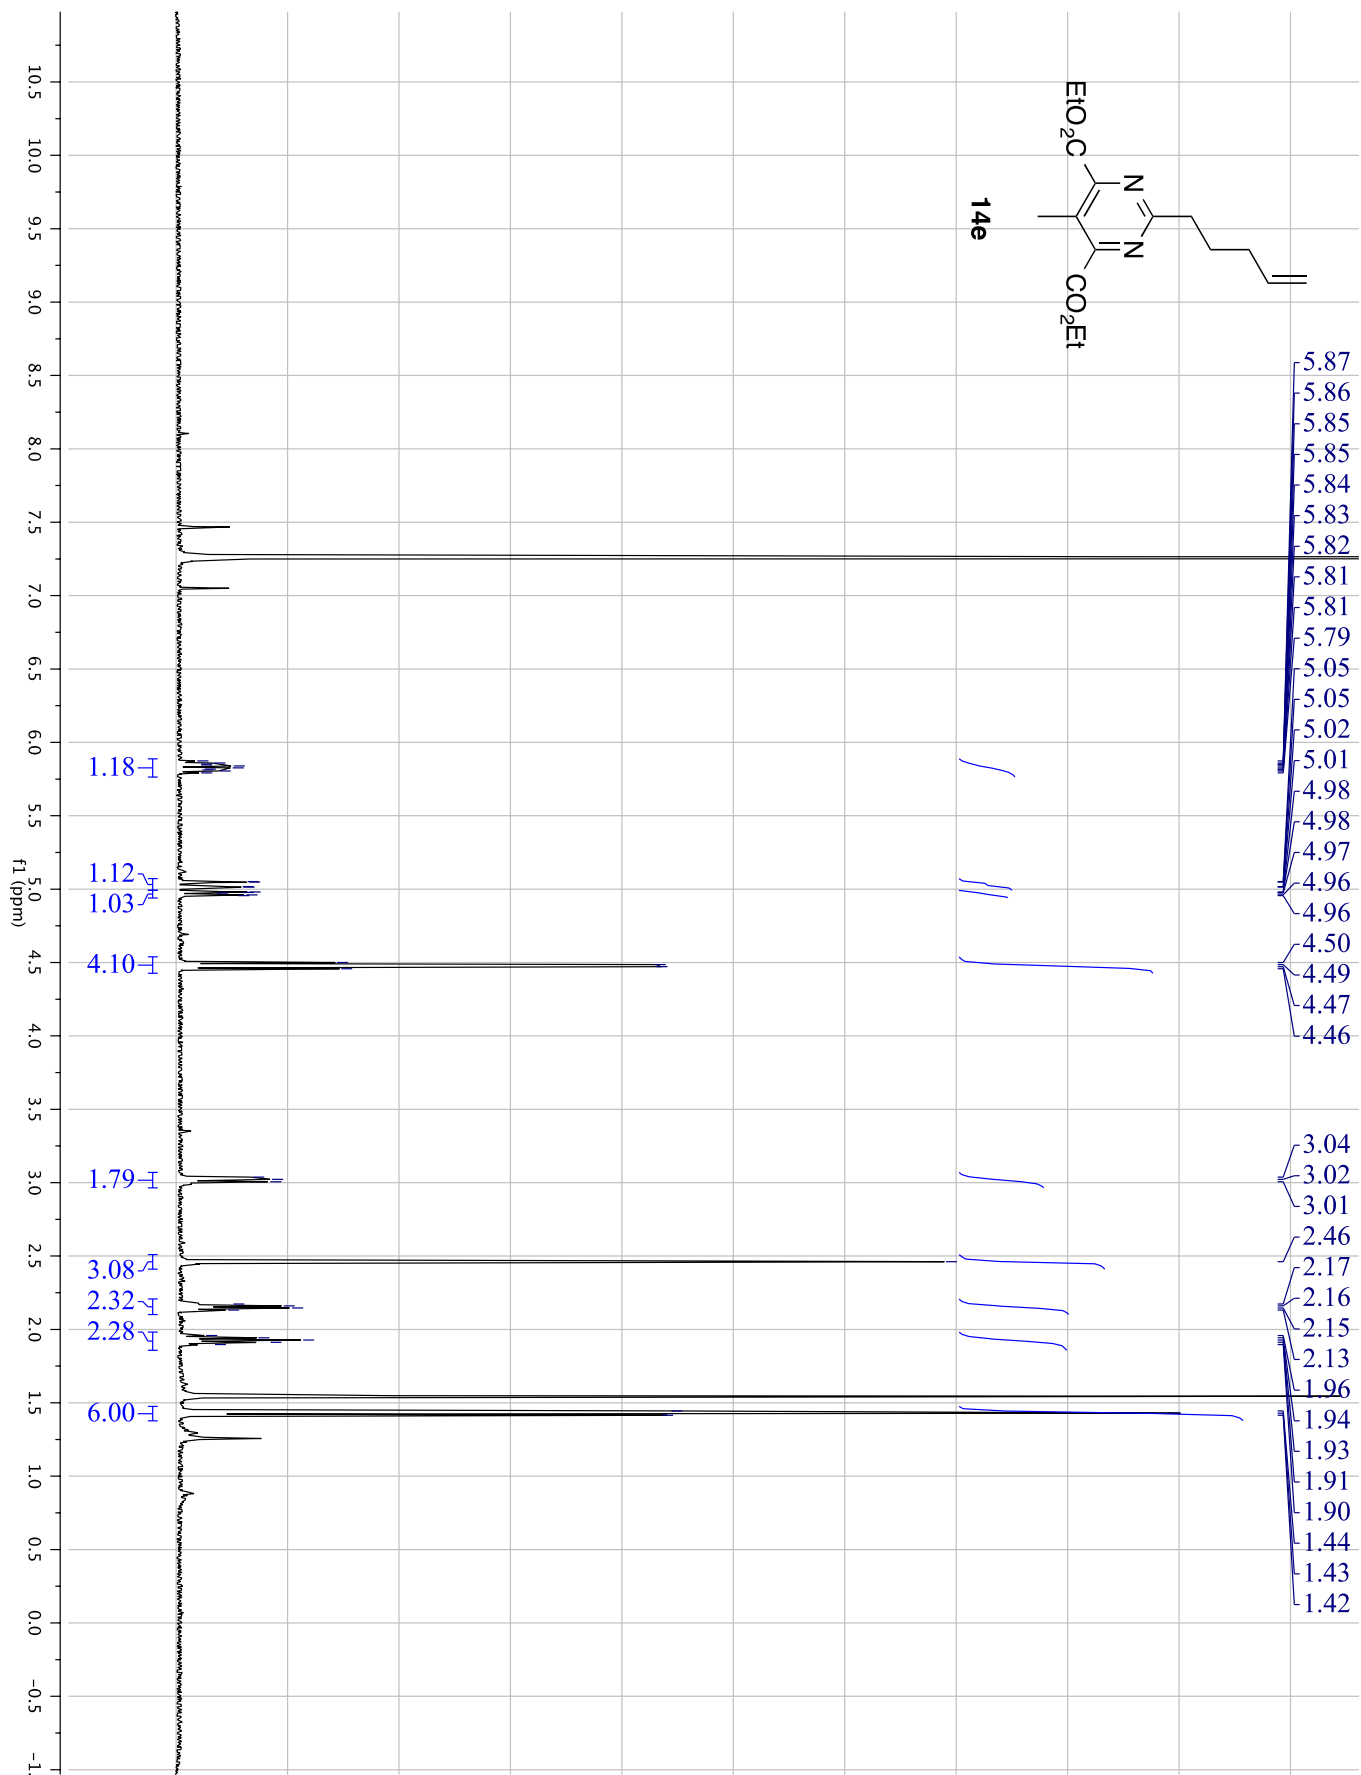

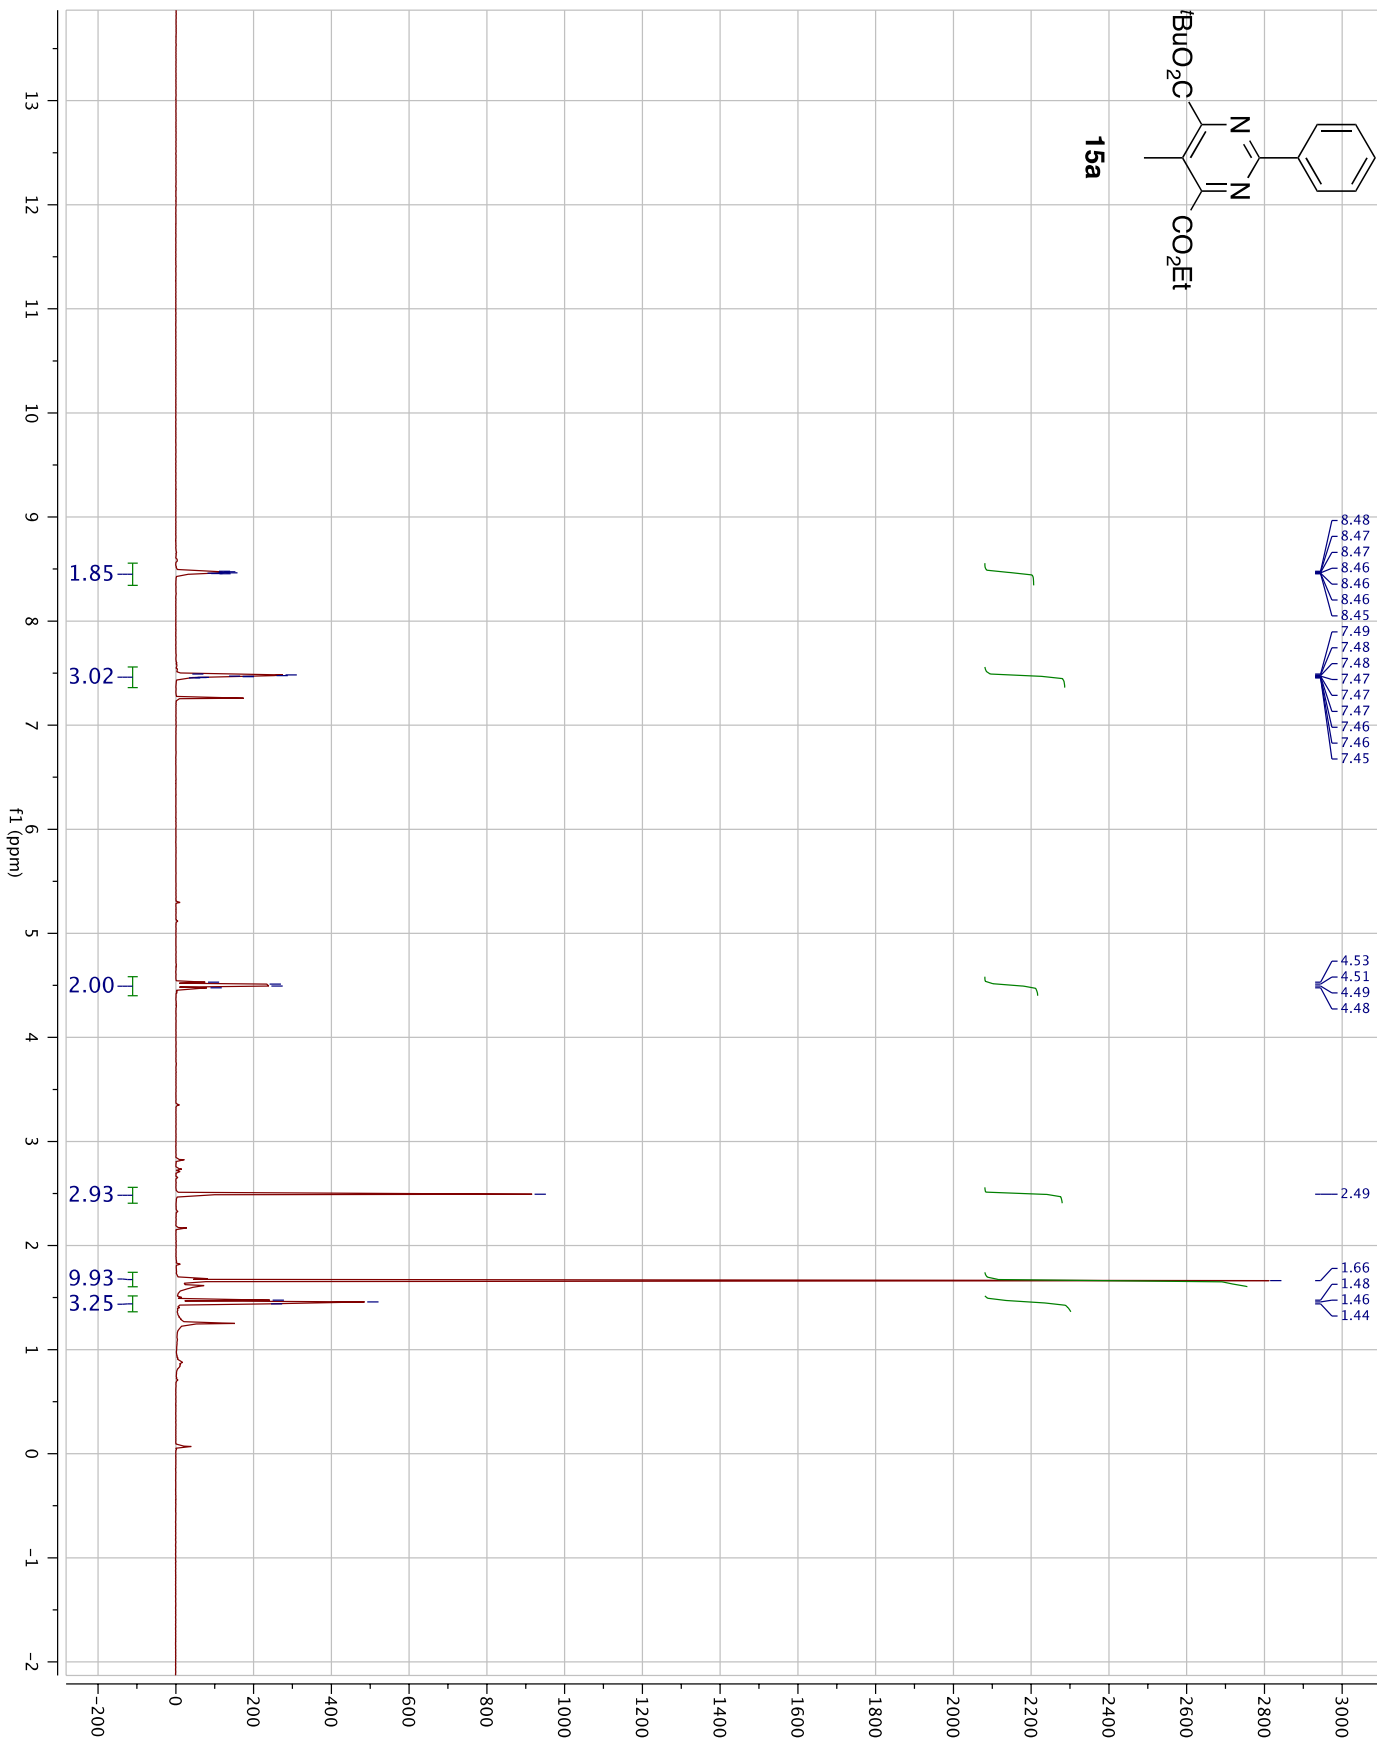

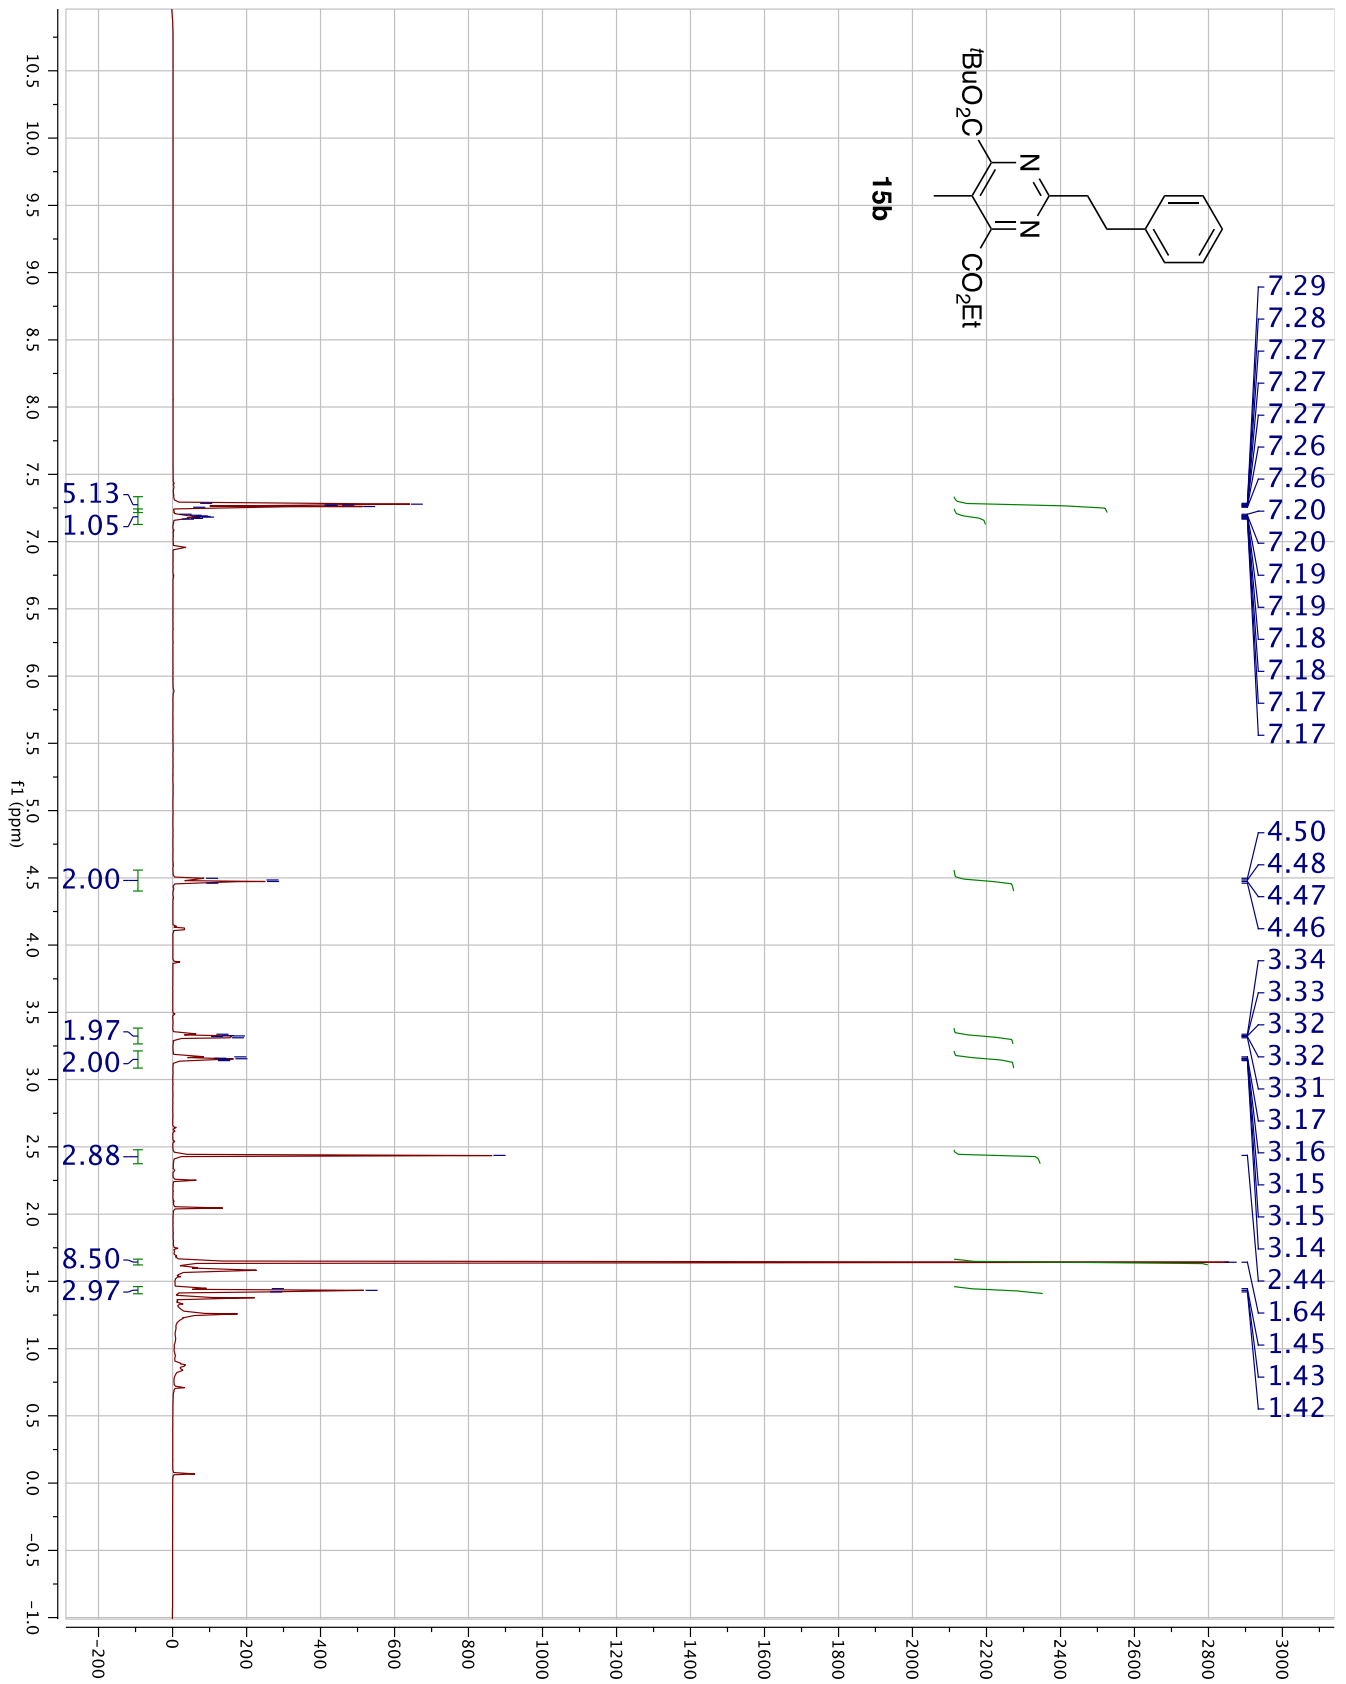

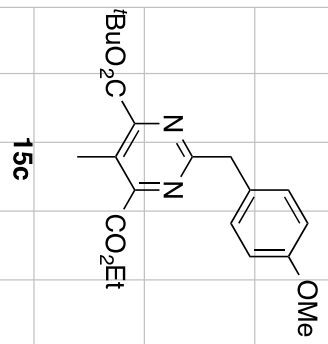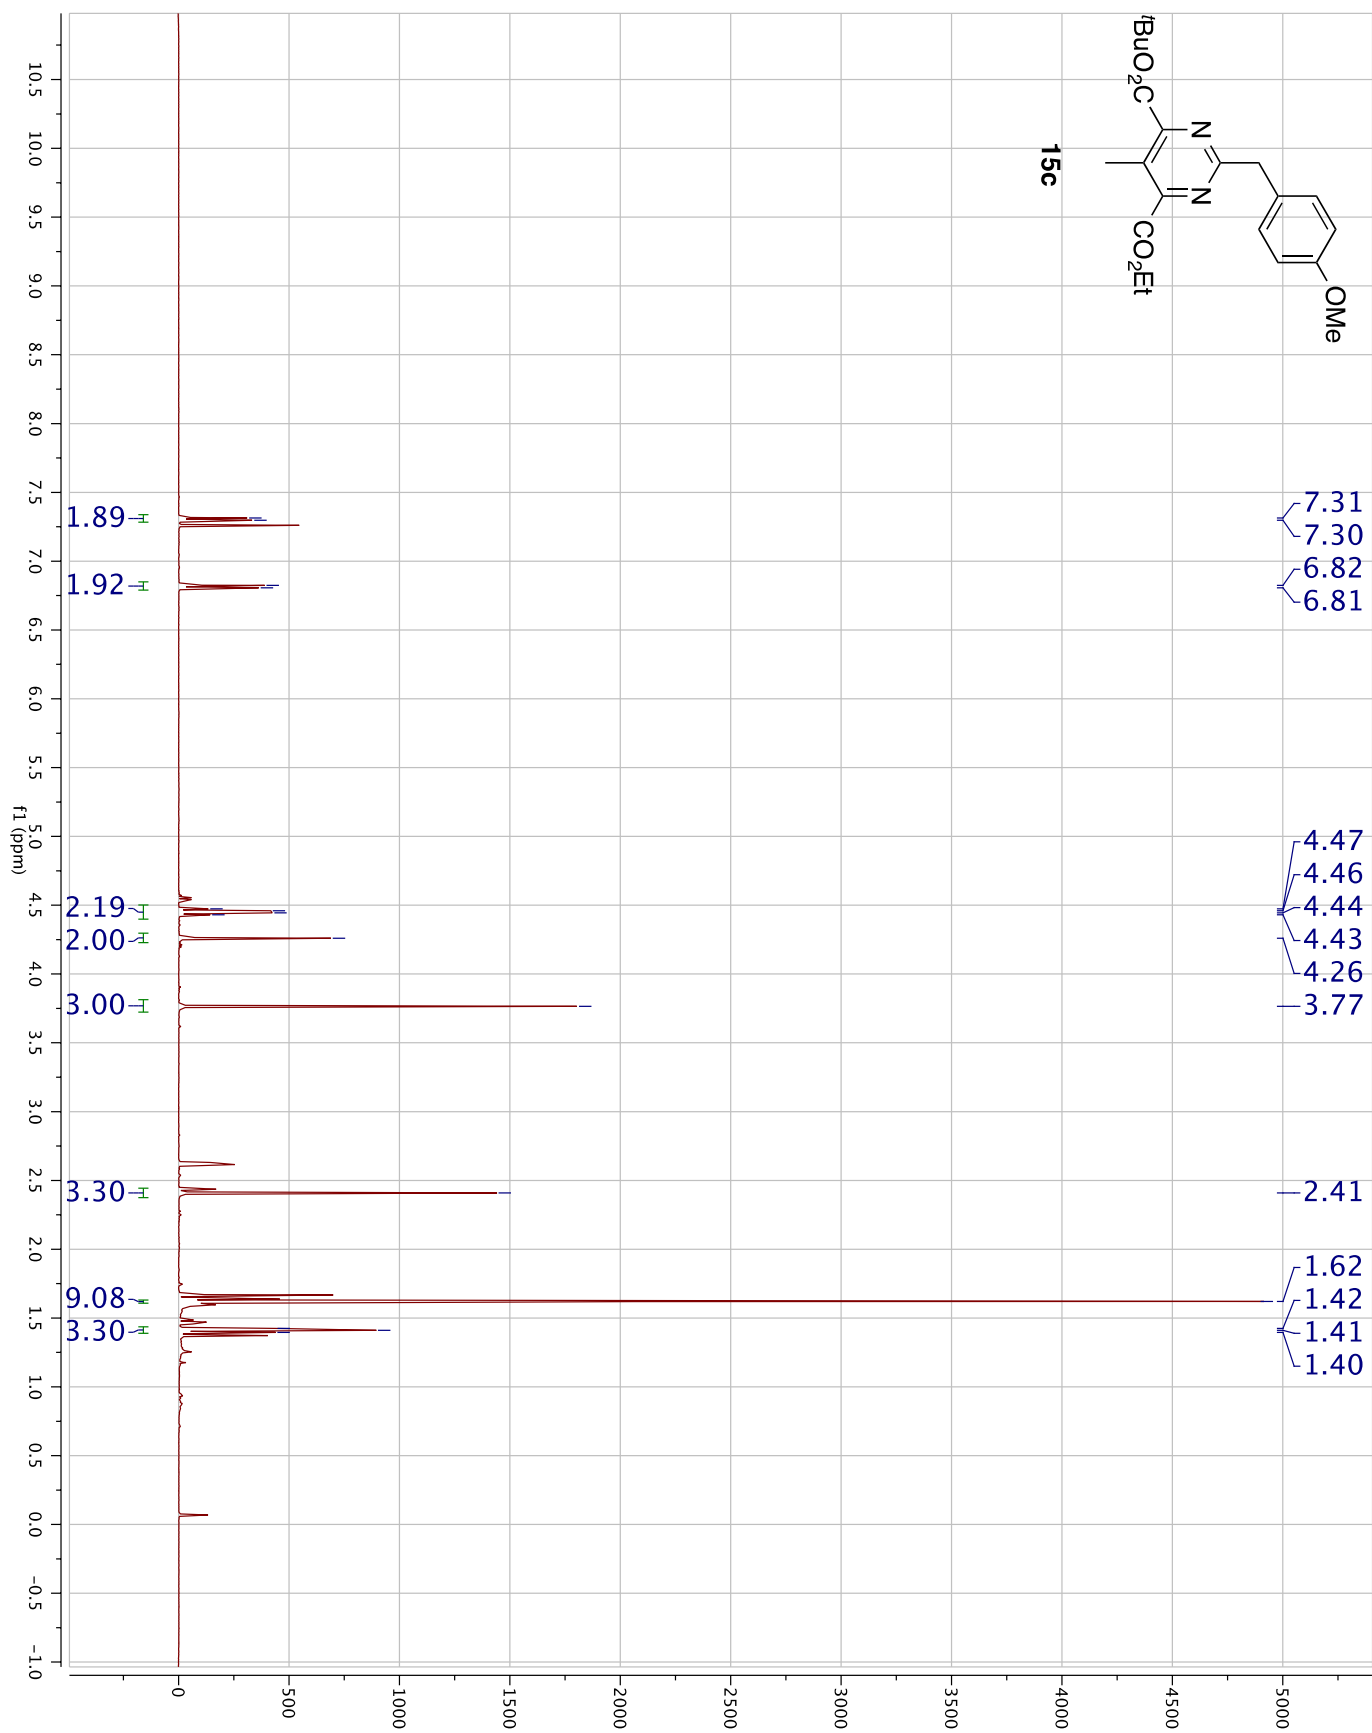

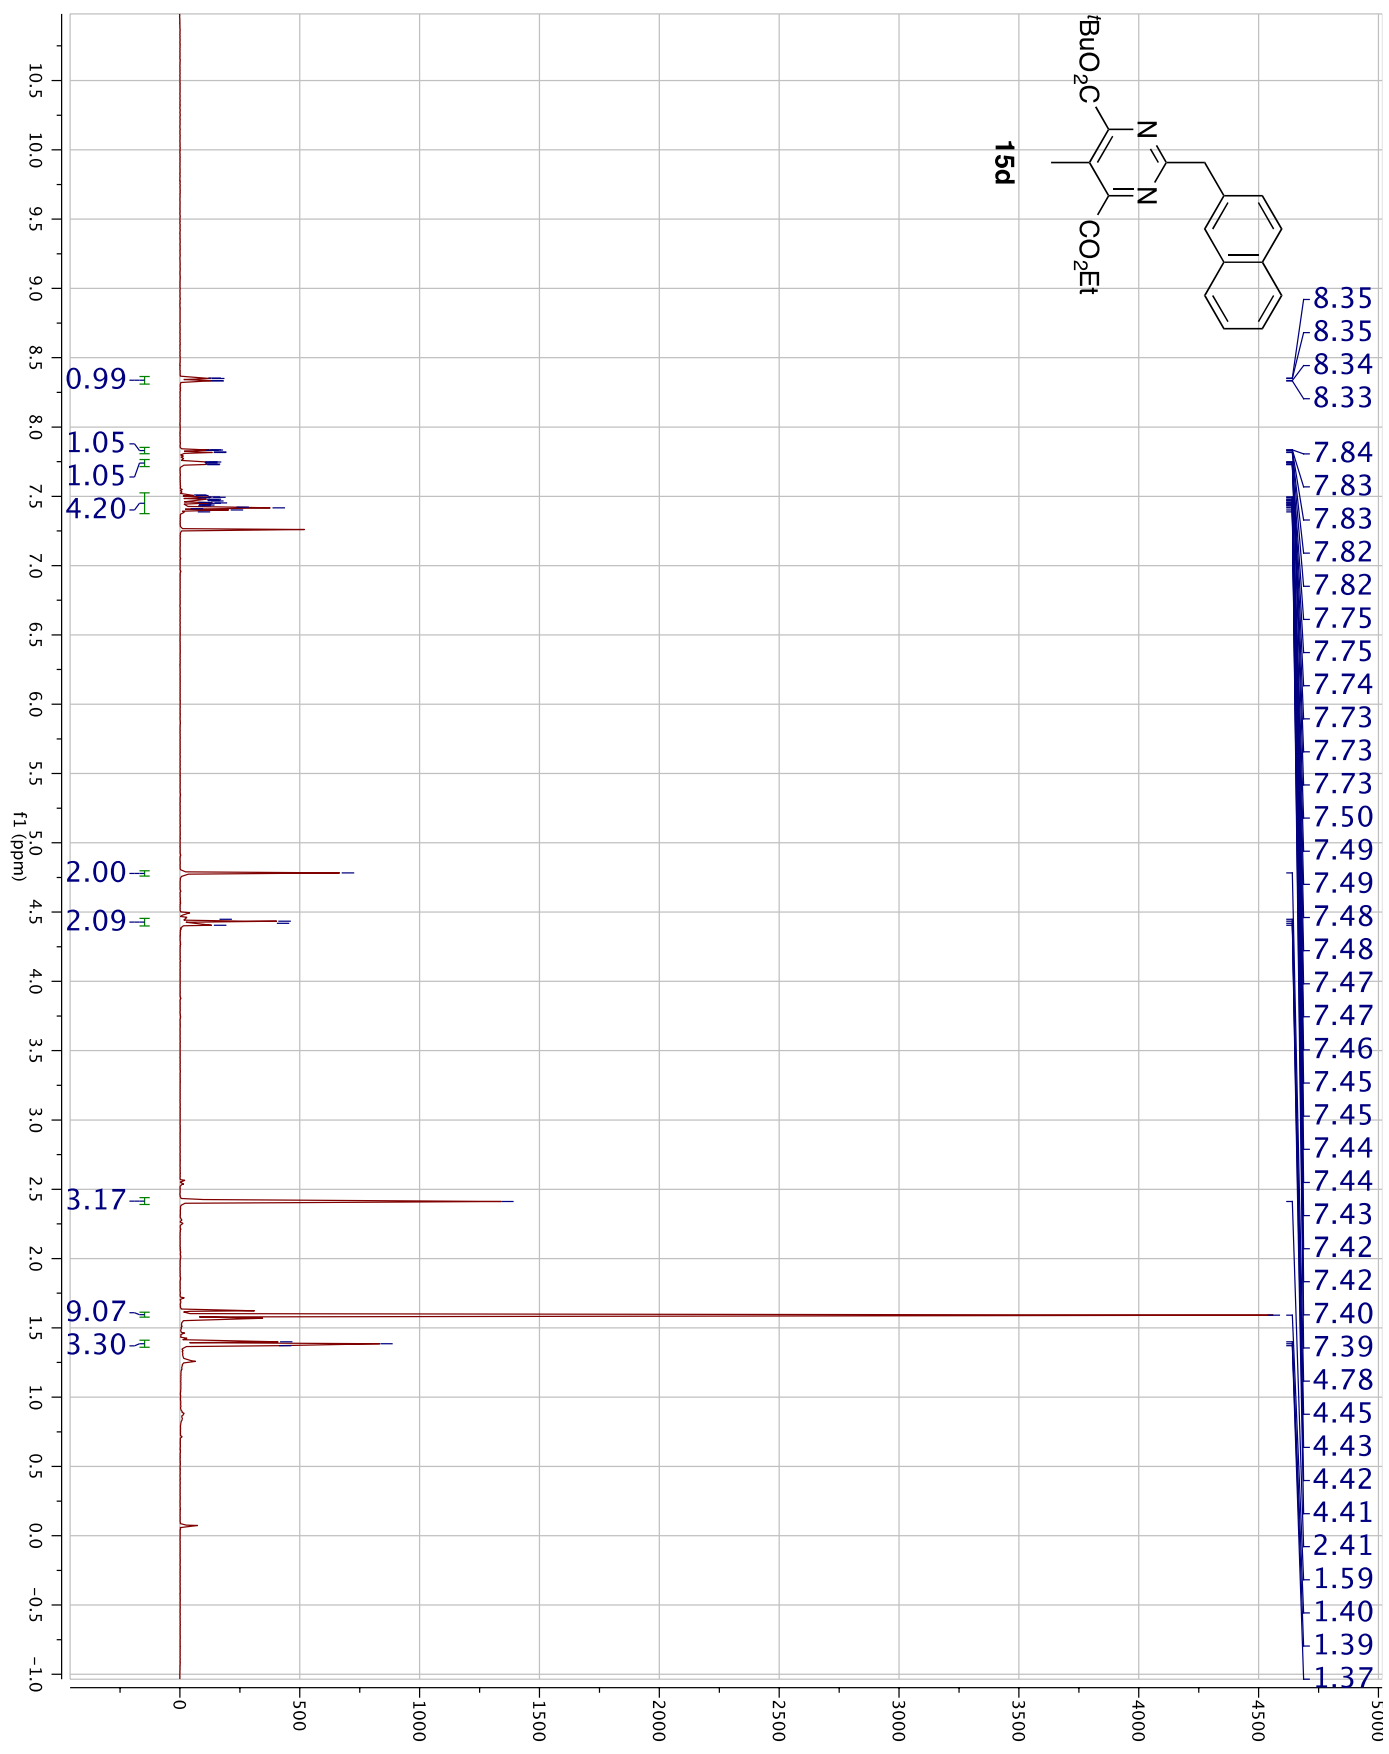

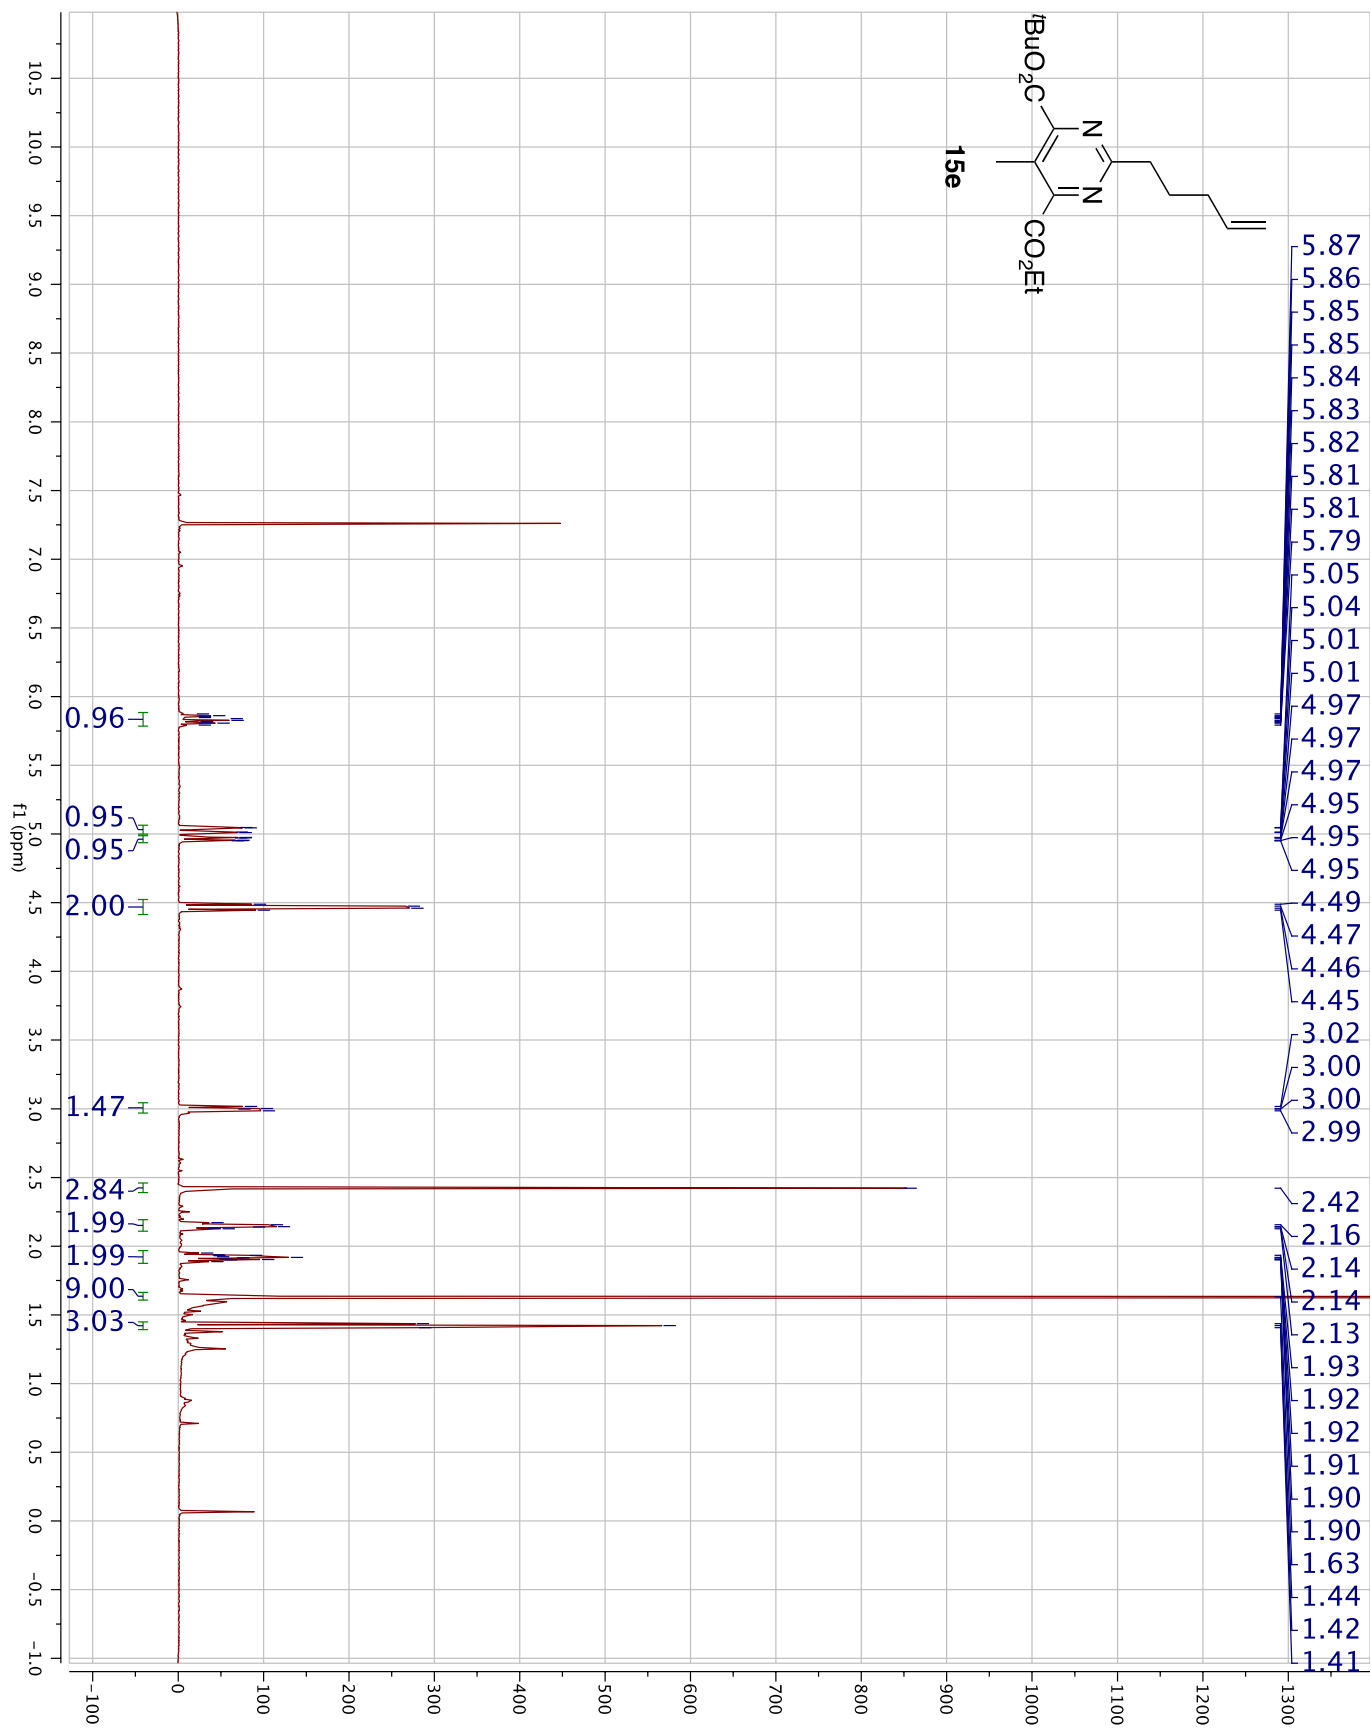

kczi\_437a\_01  
Std. proton

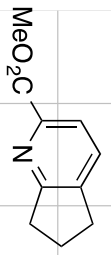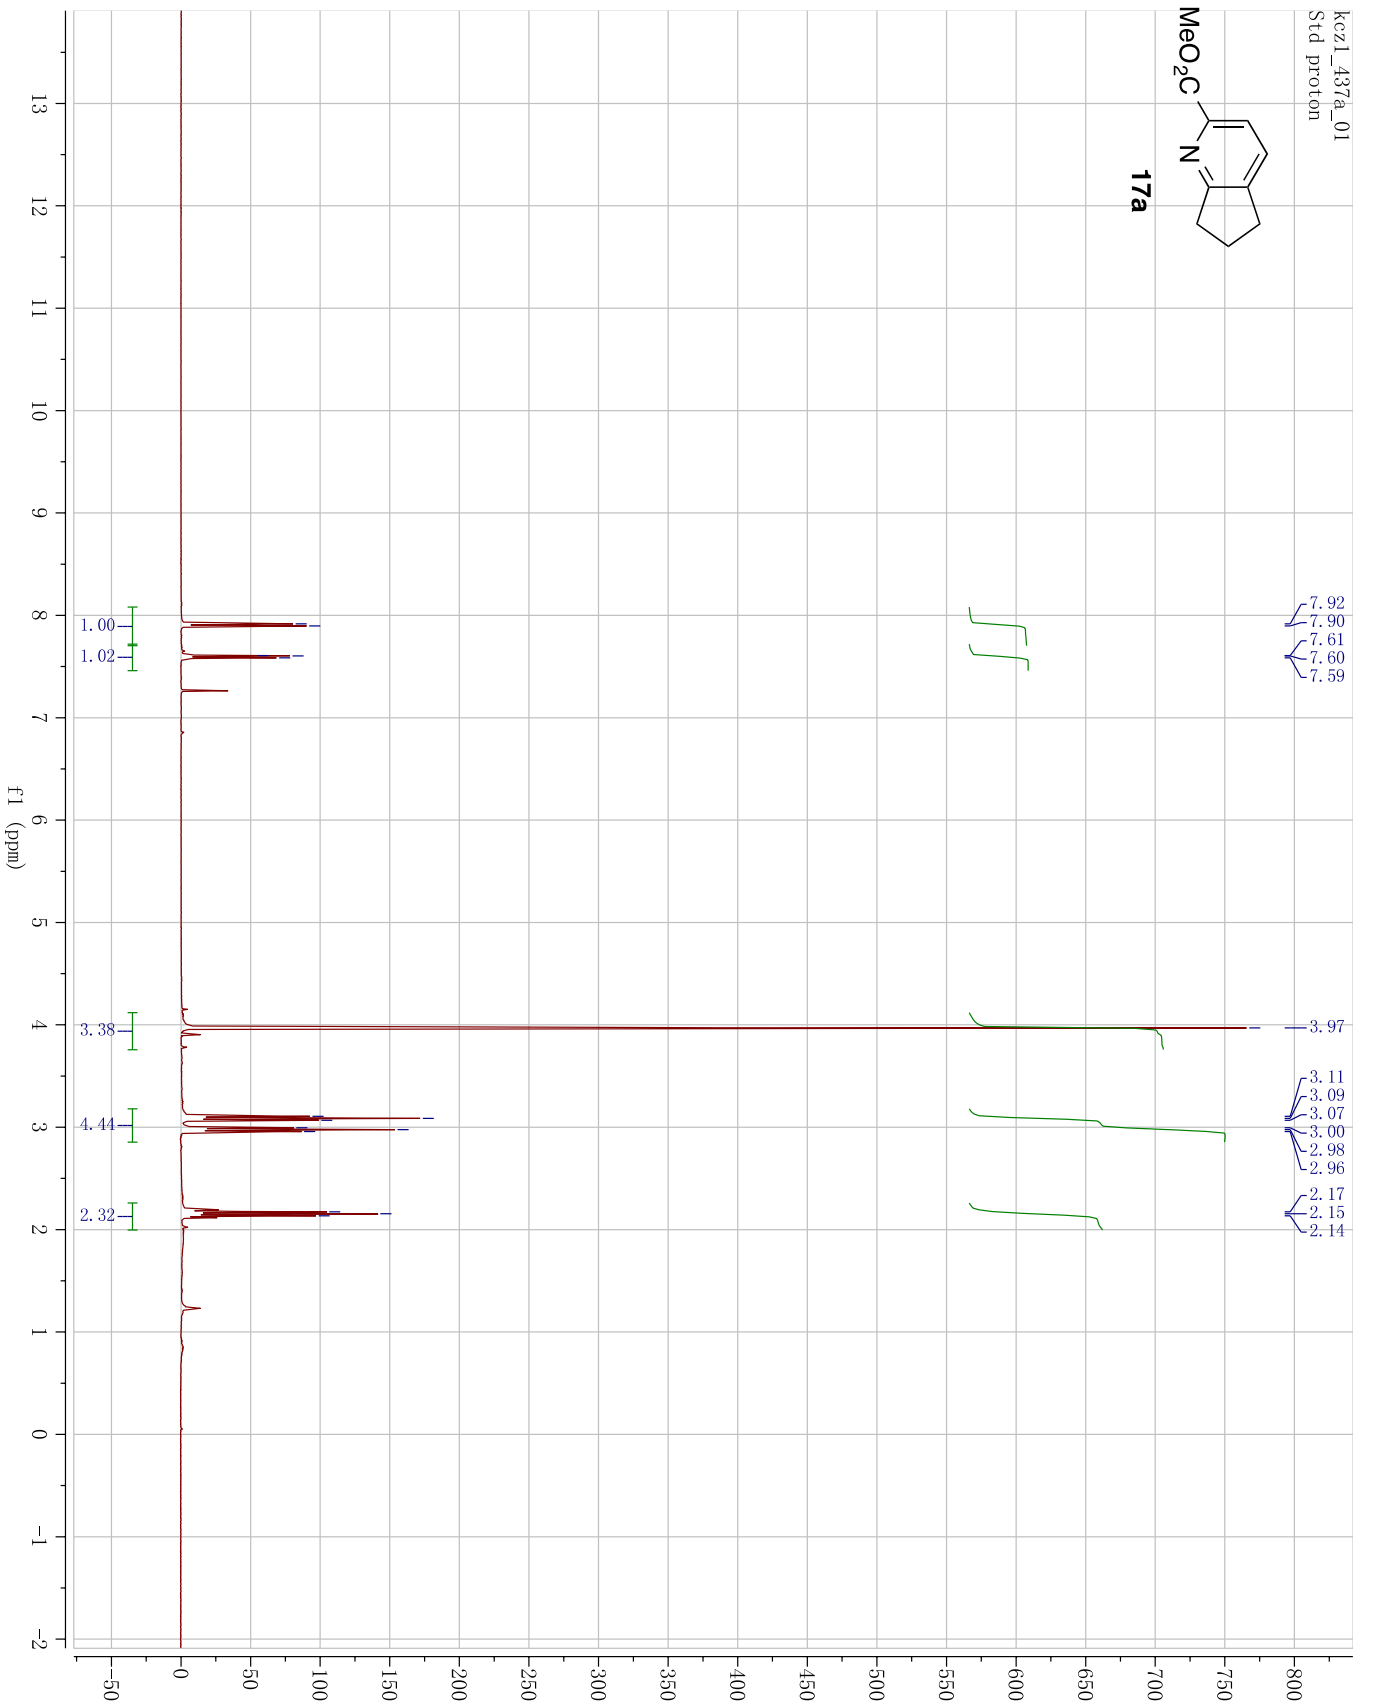

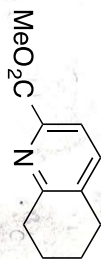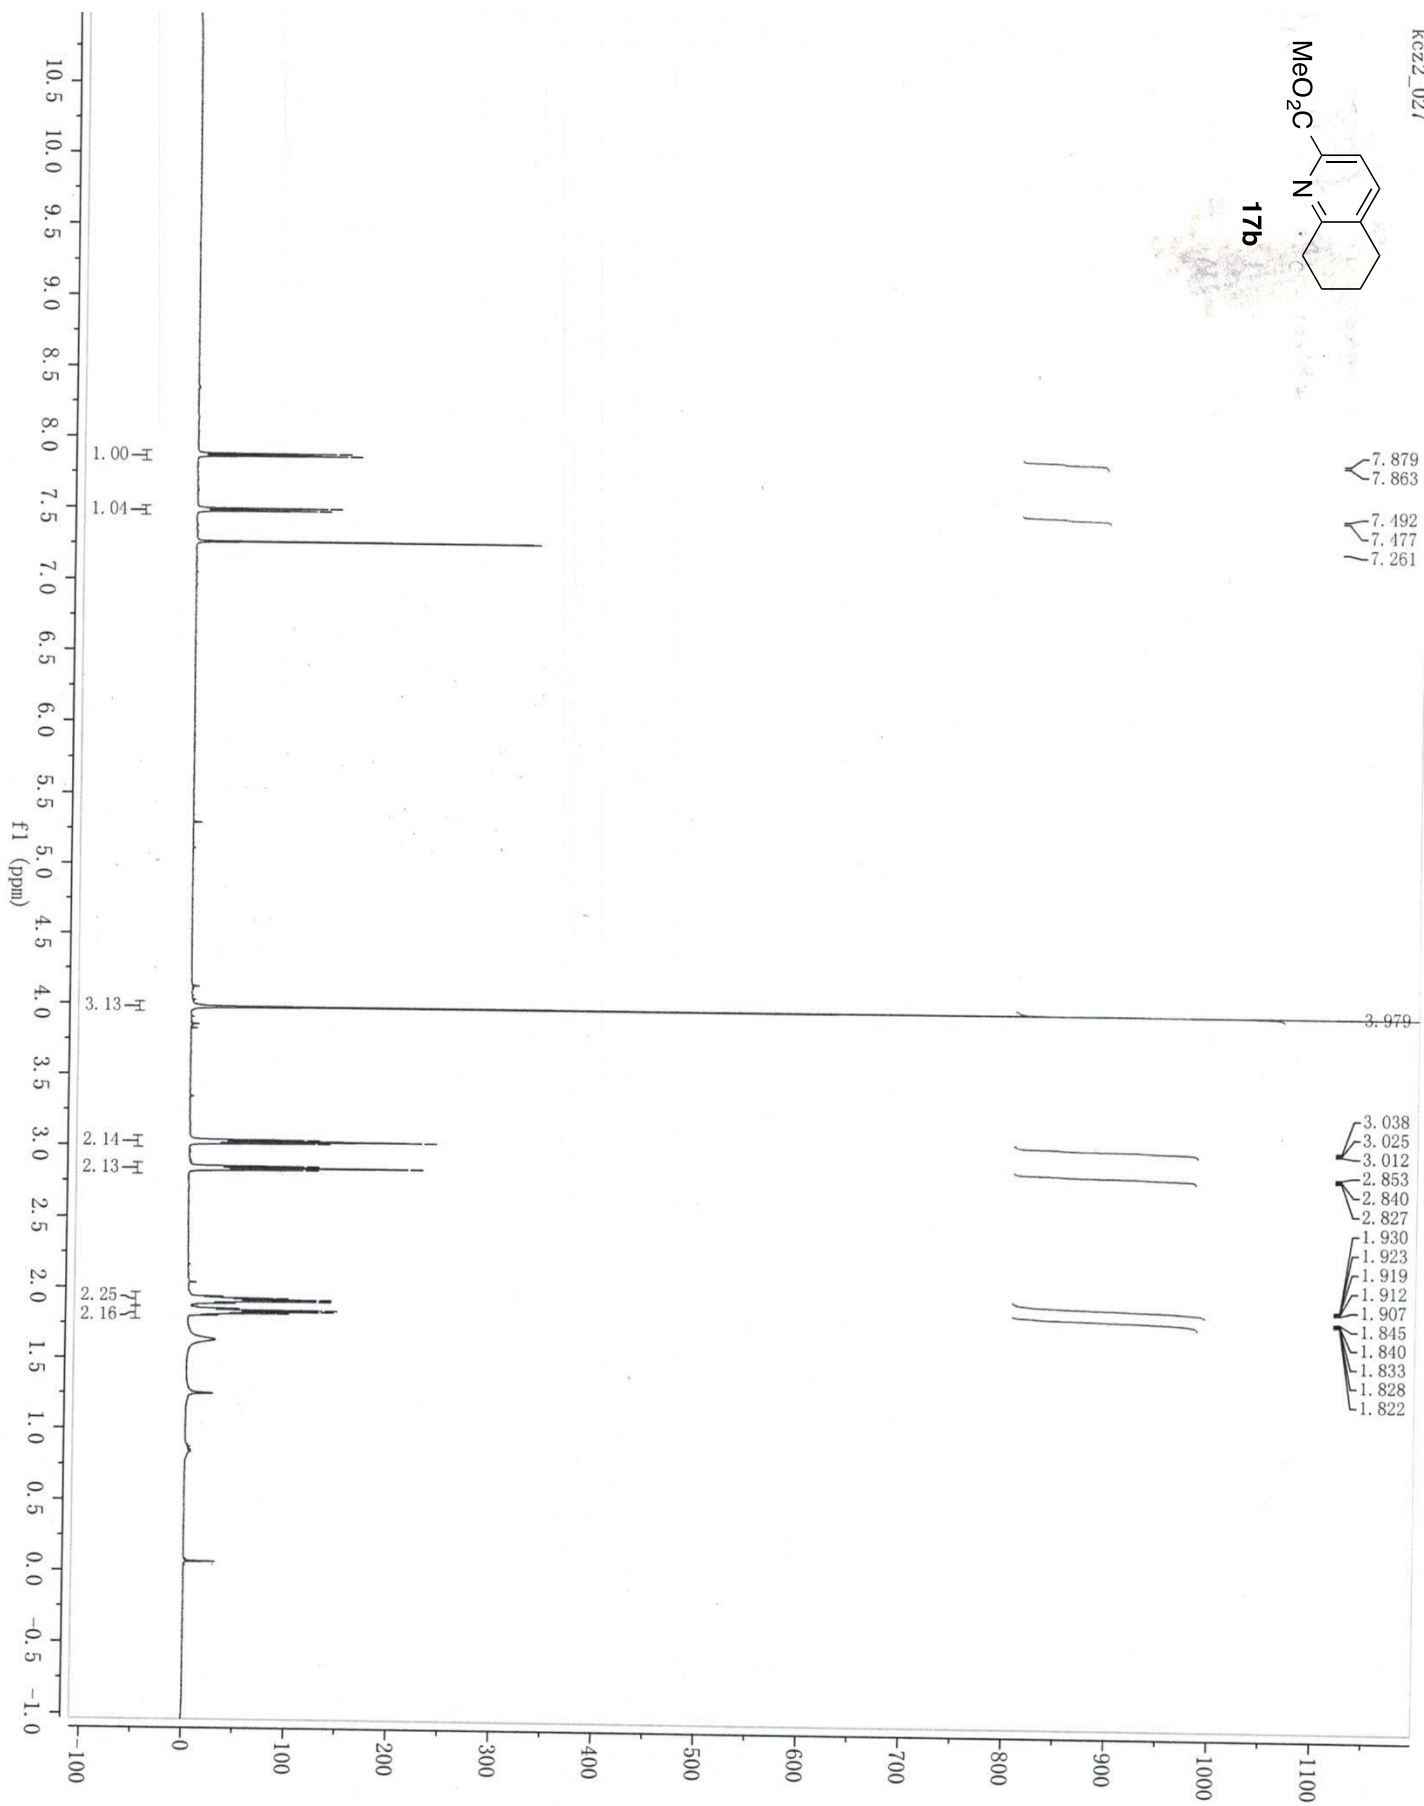



kez2\_273a\_01  
Std proton

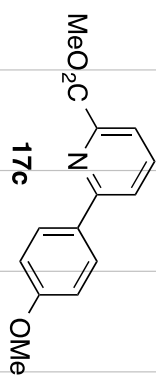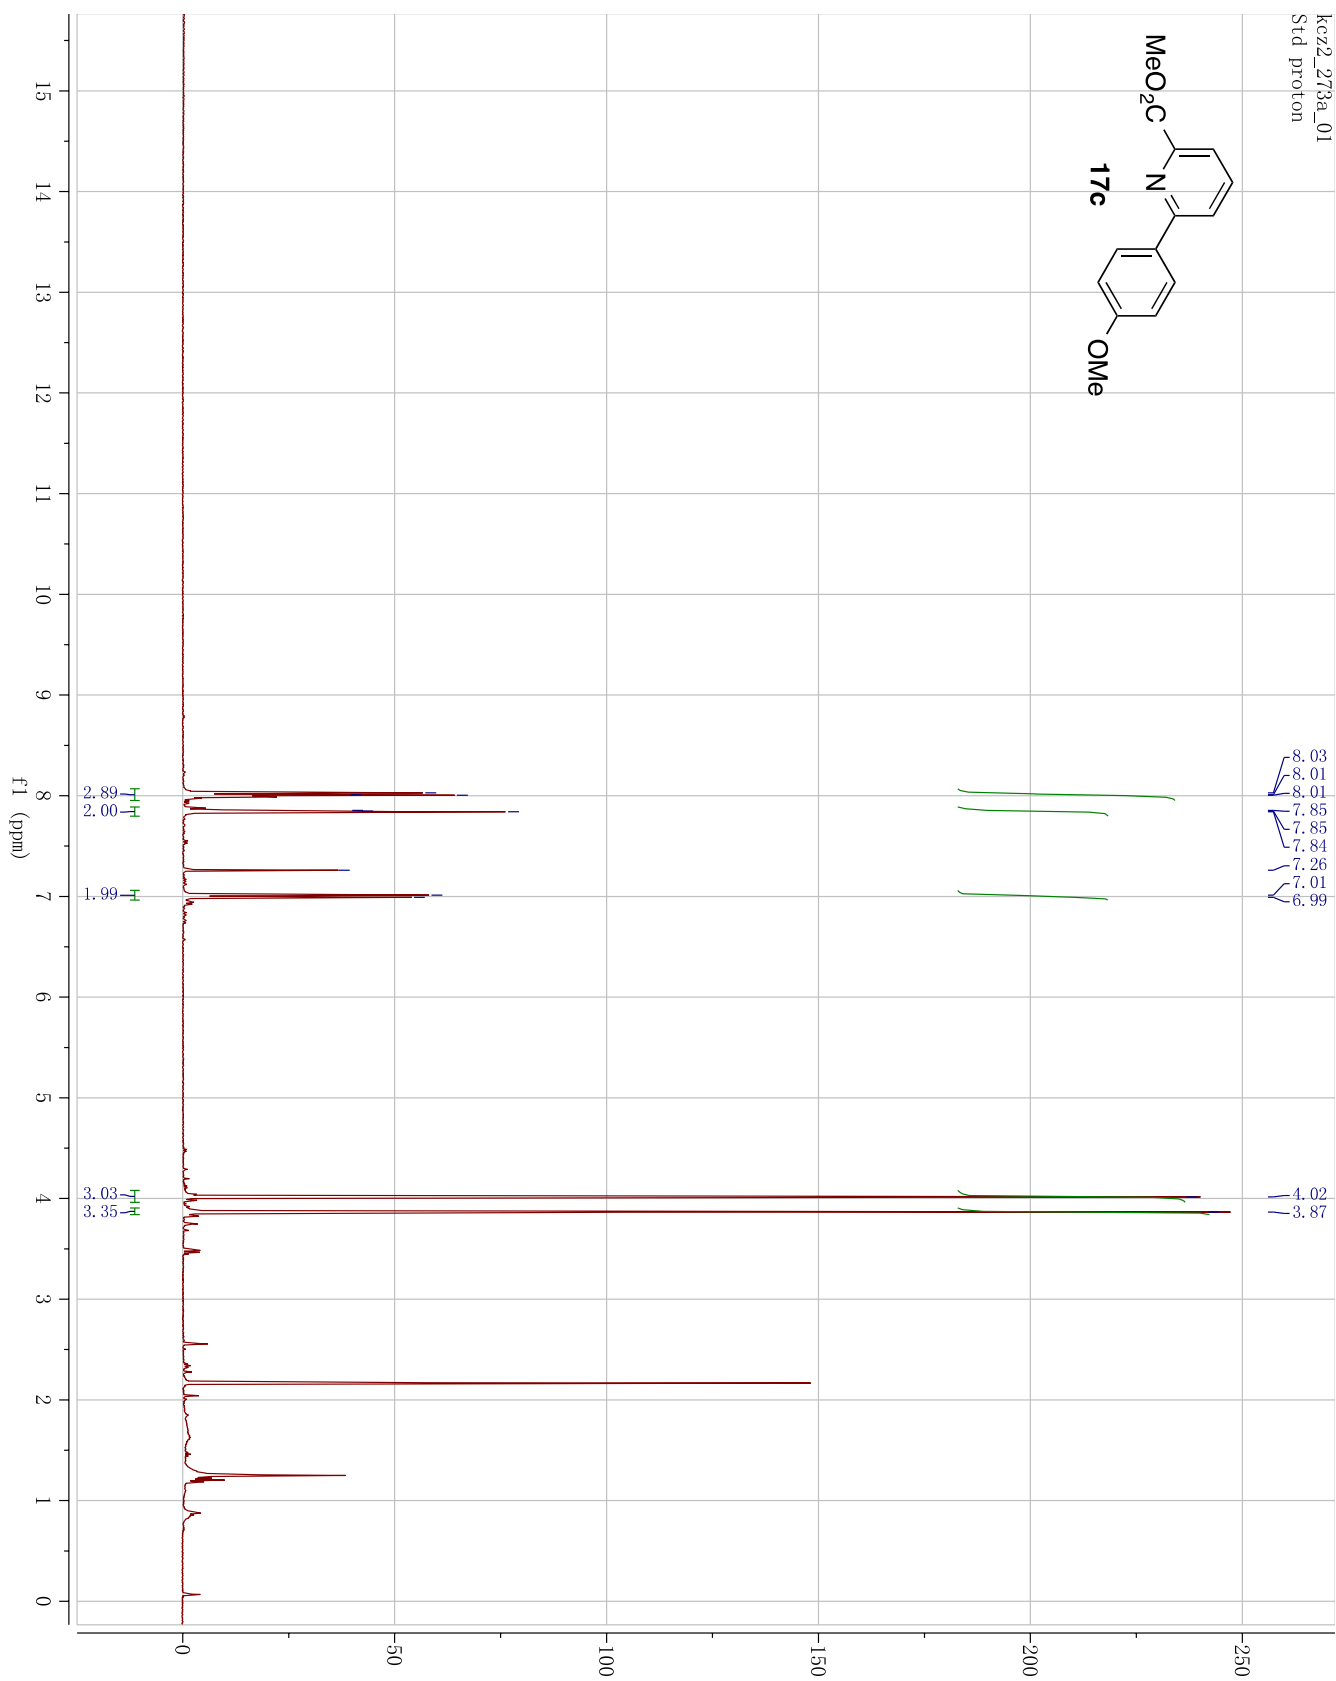

kczi\_273b\_01  
Std proton

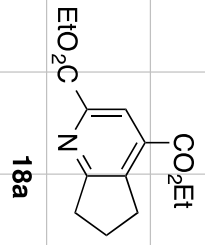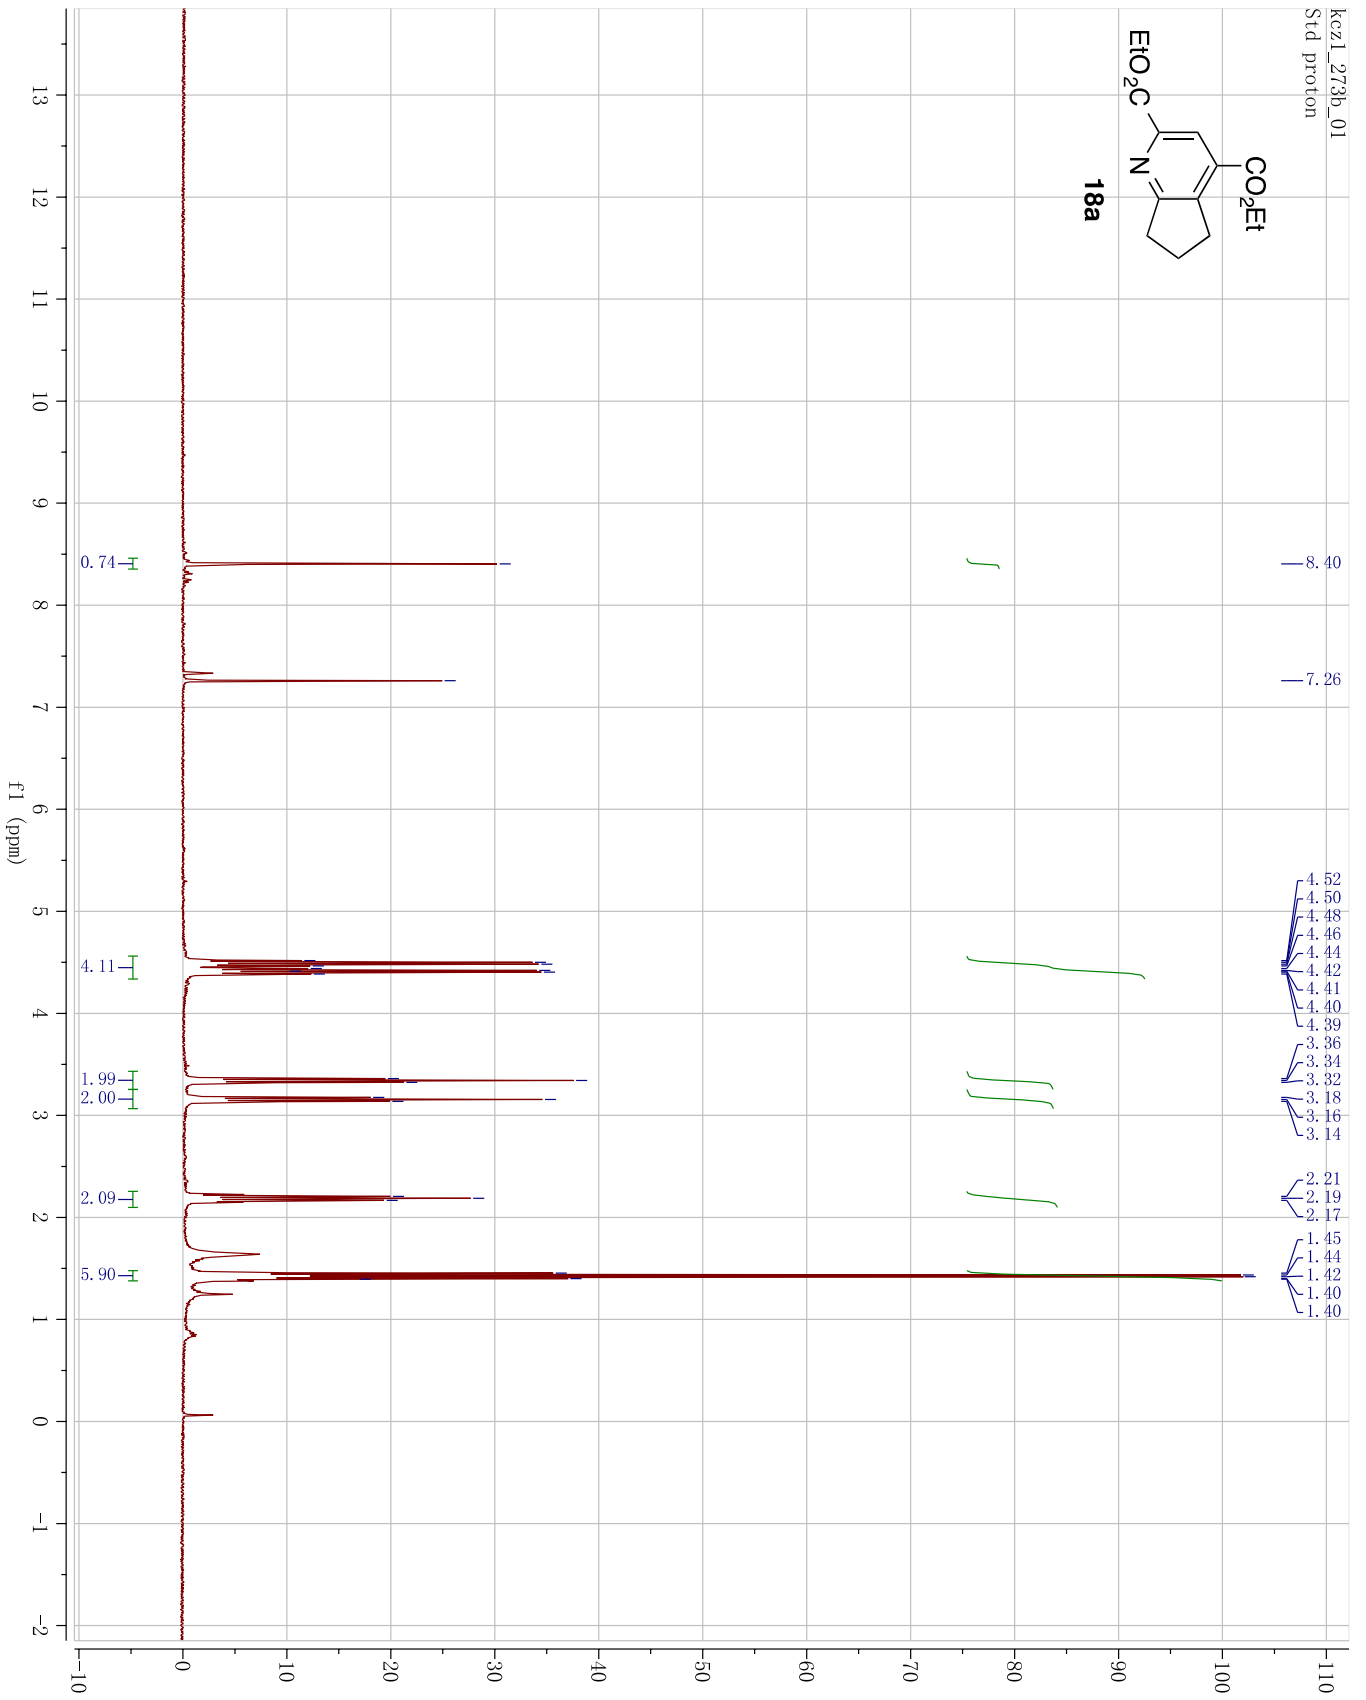

kc72-029\_re/1  
H-1 Routine, DRX-500, BBO Probe

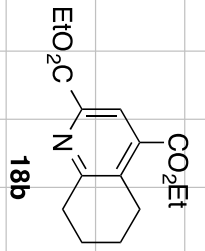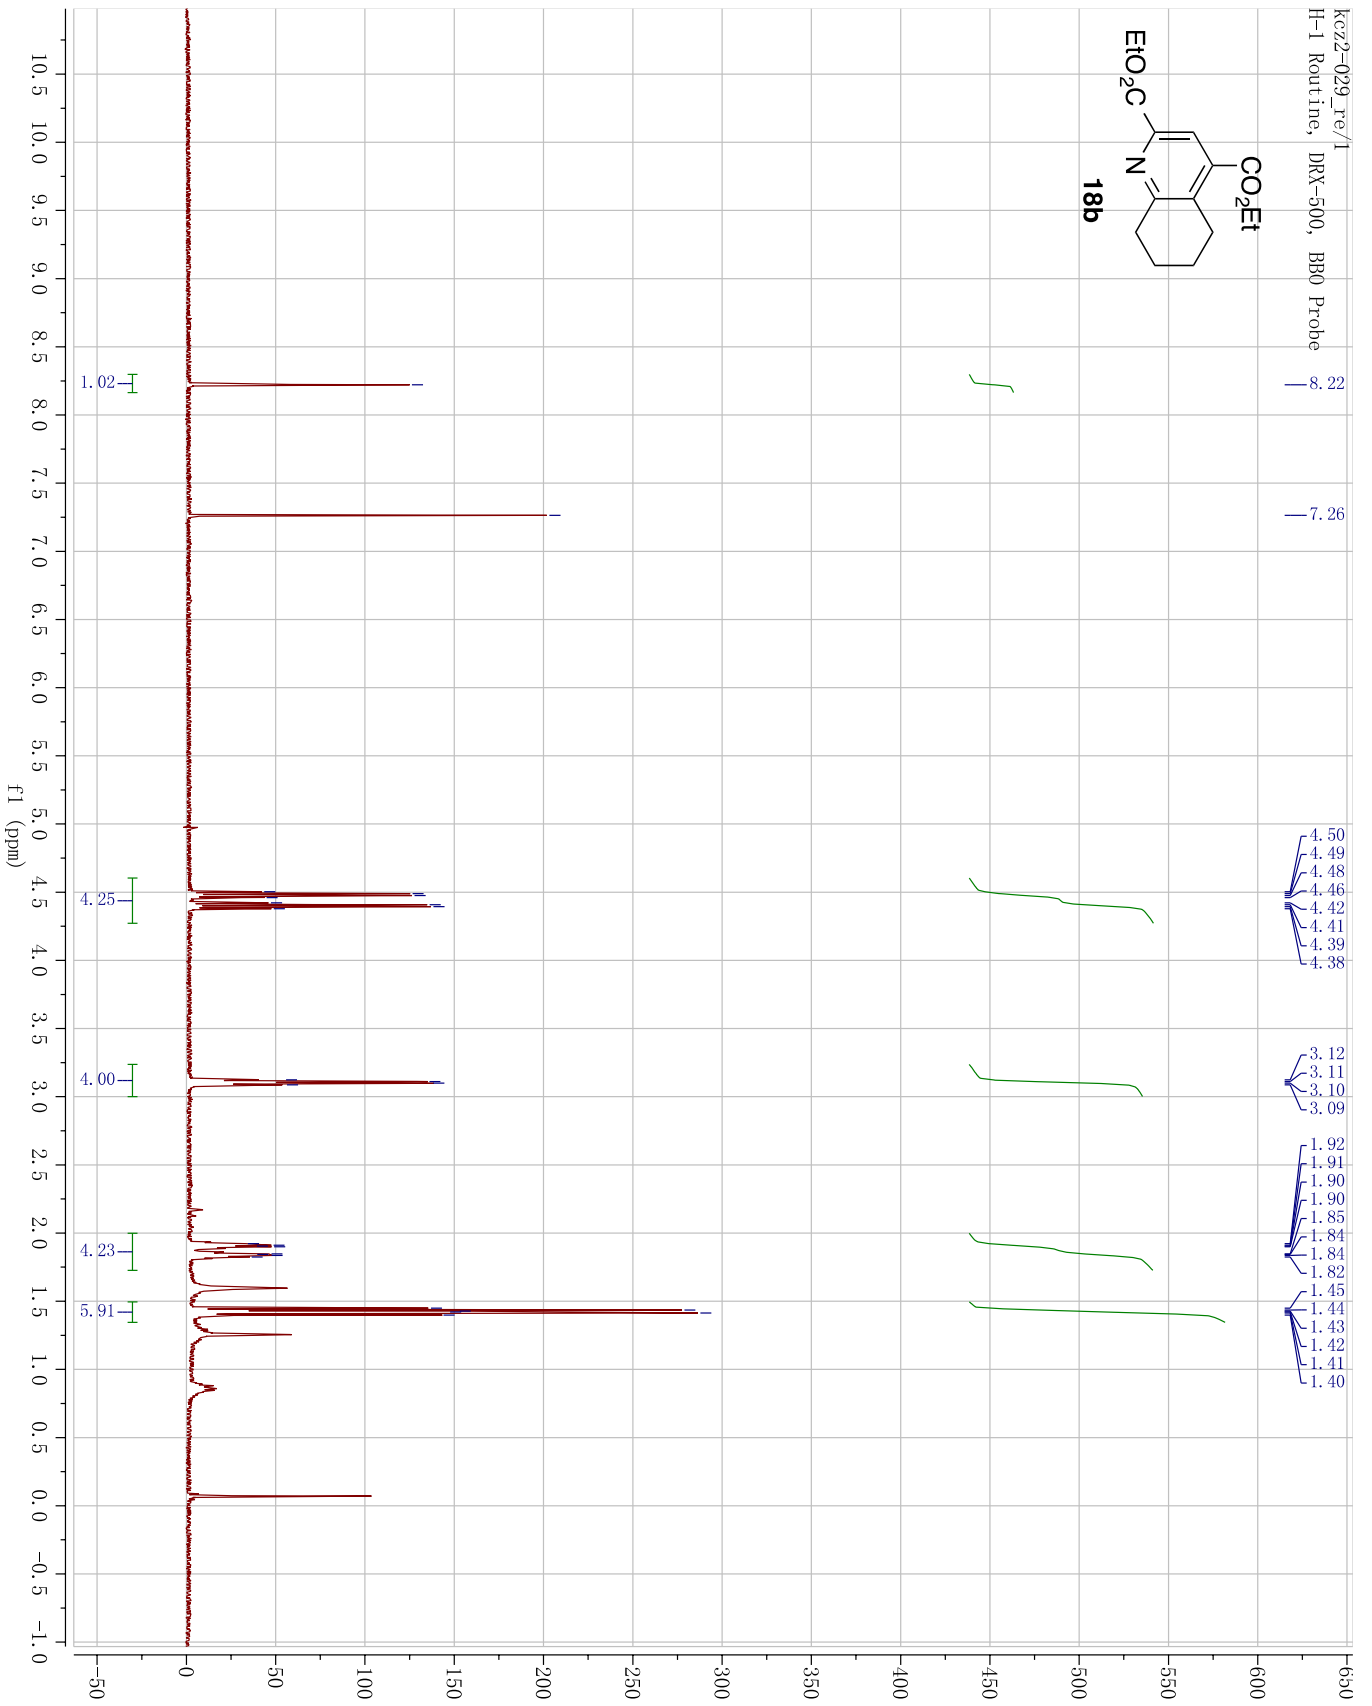

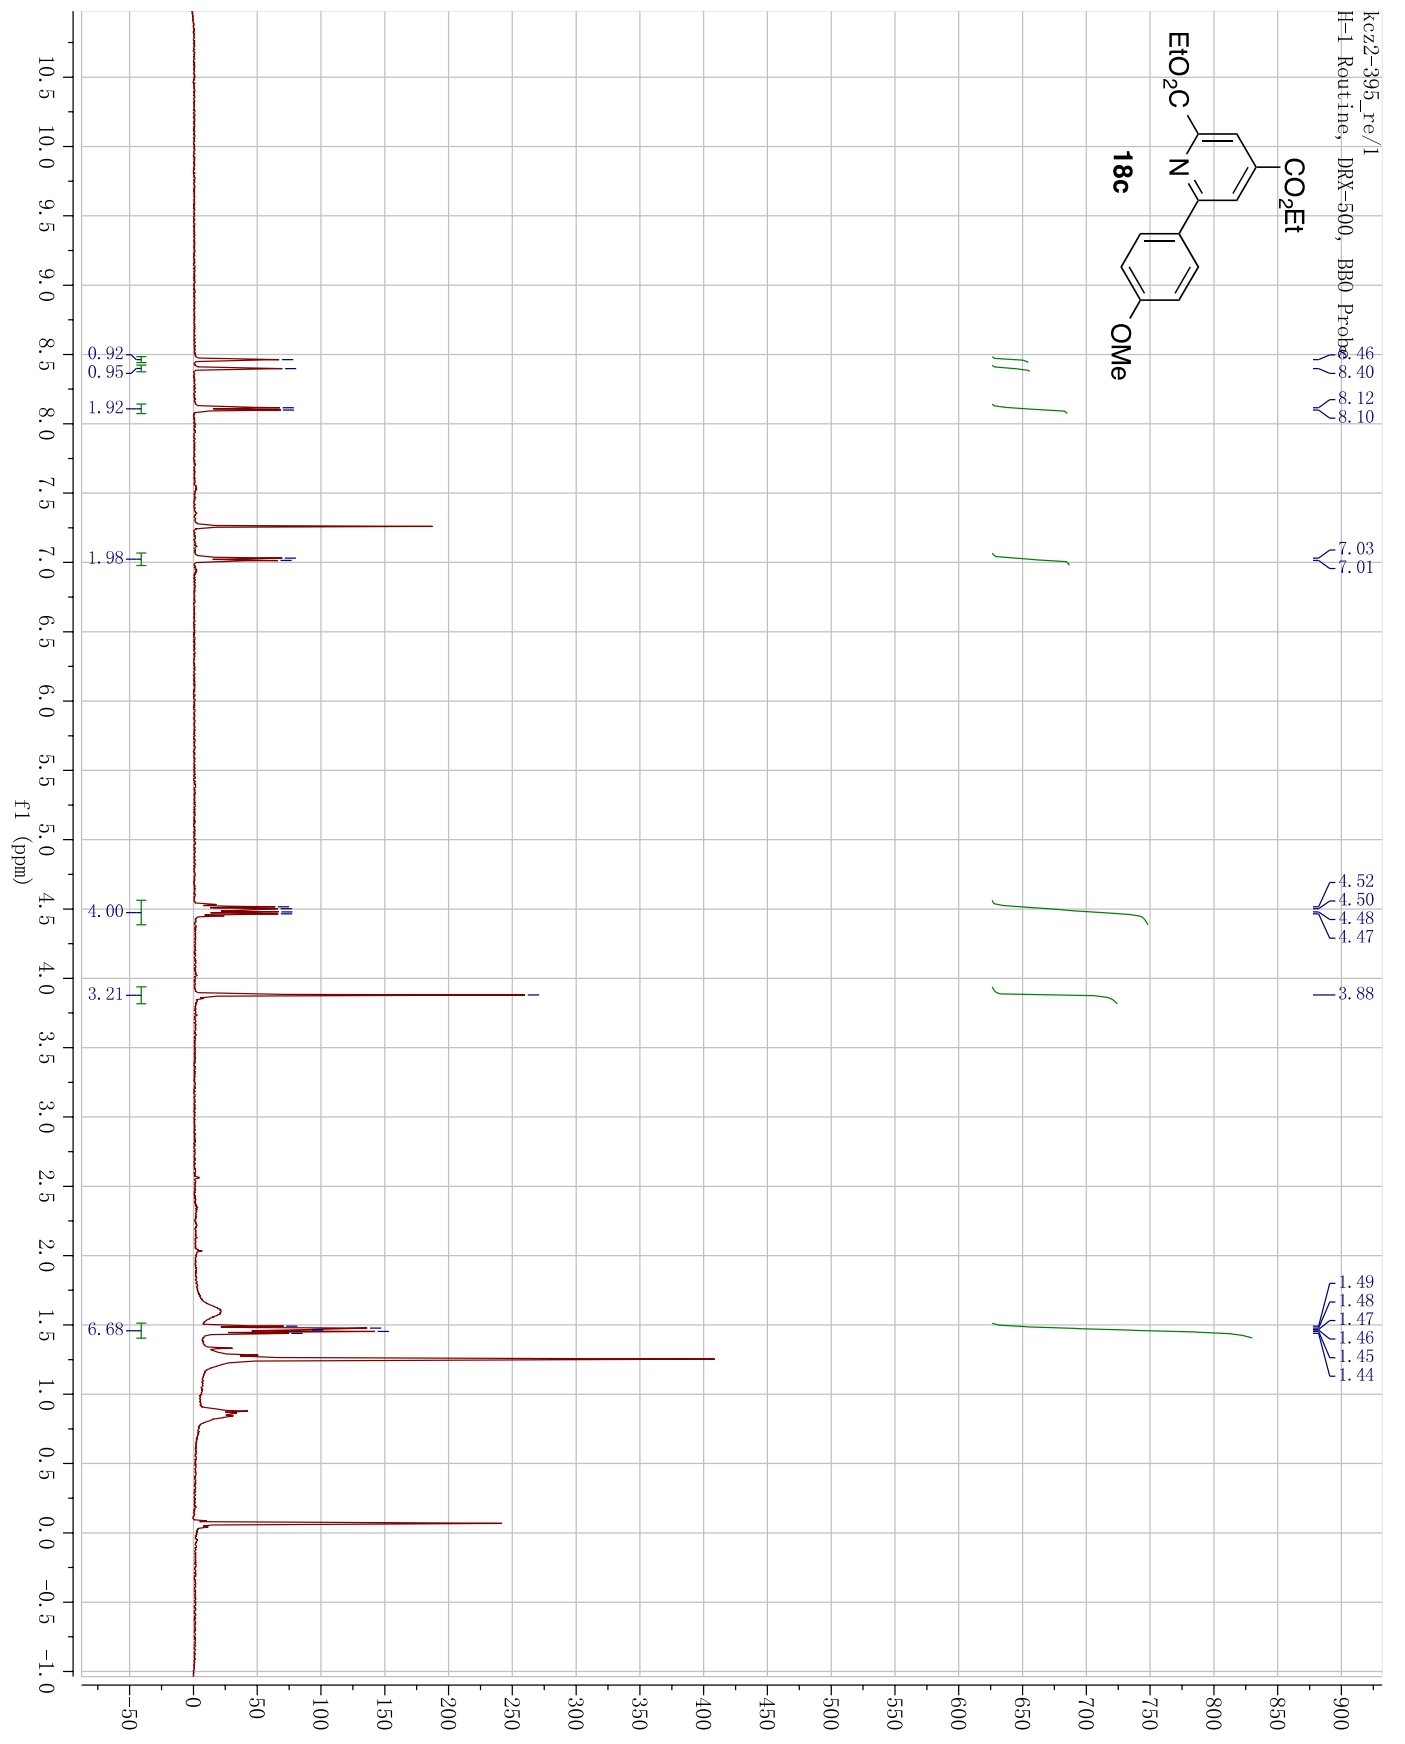

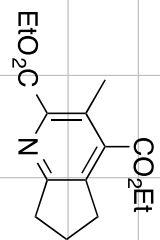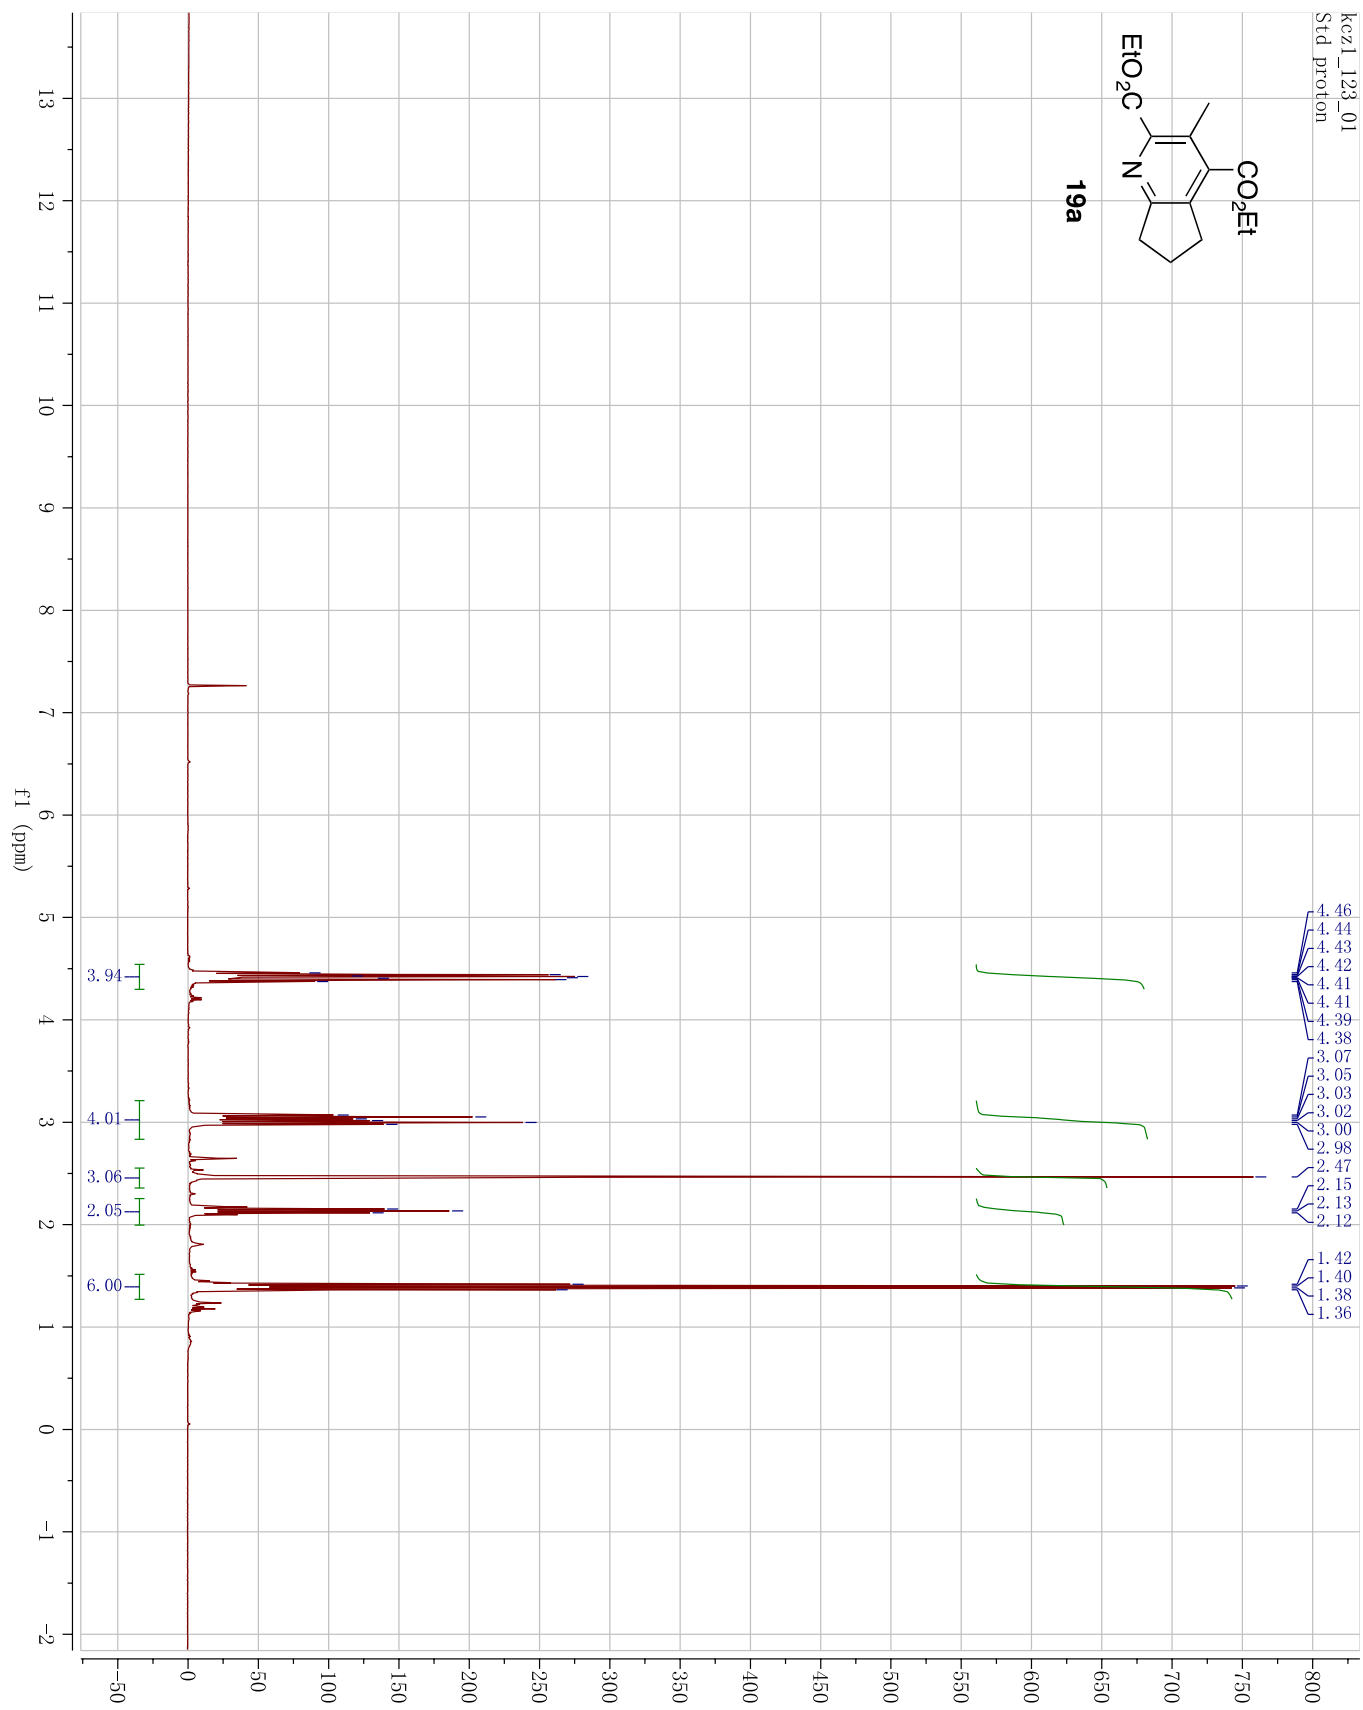

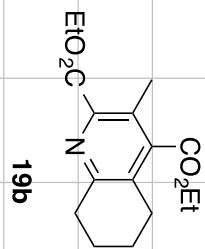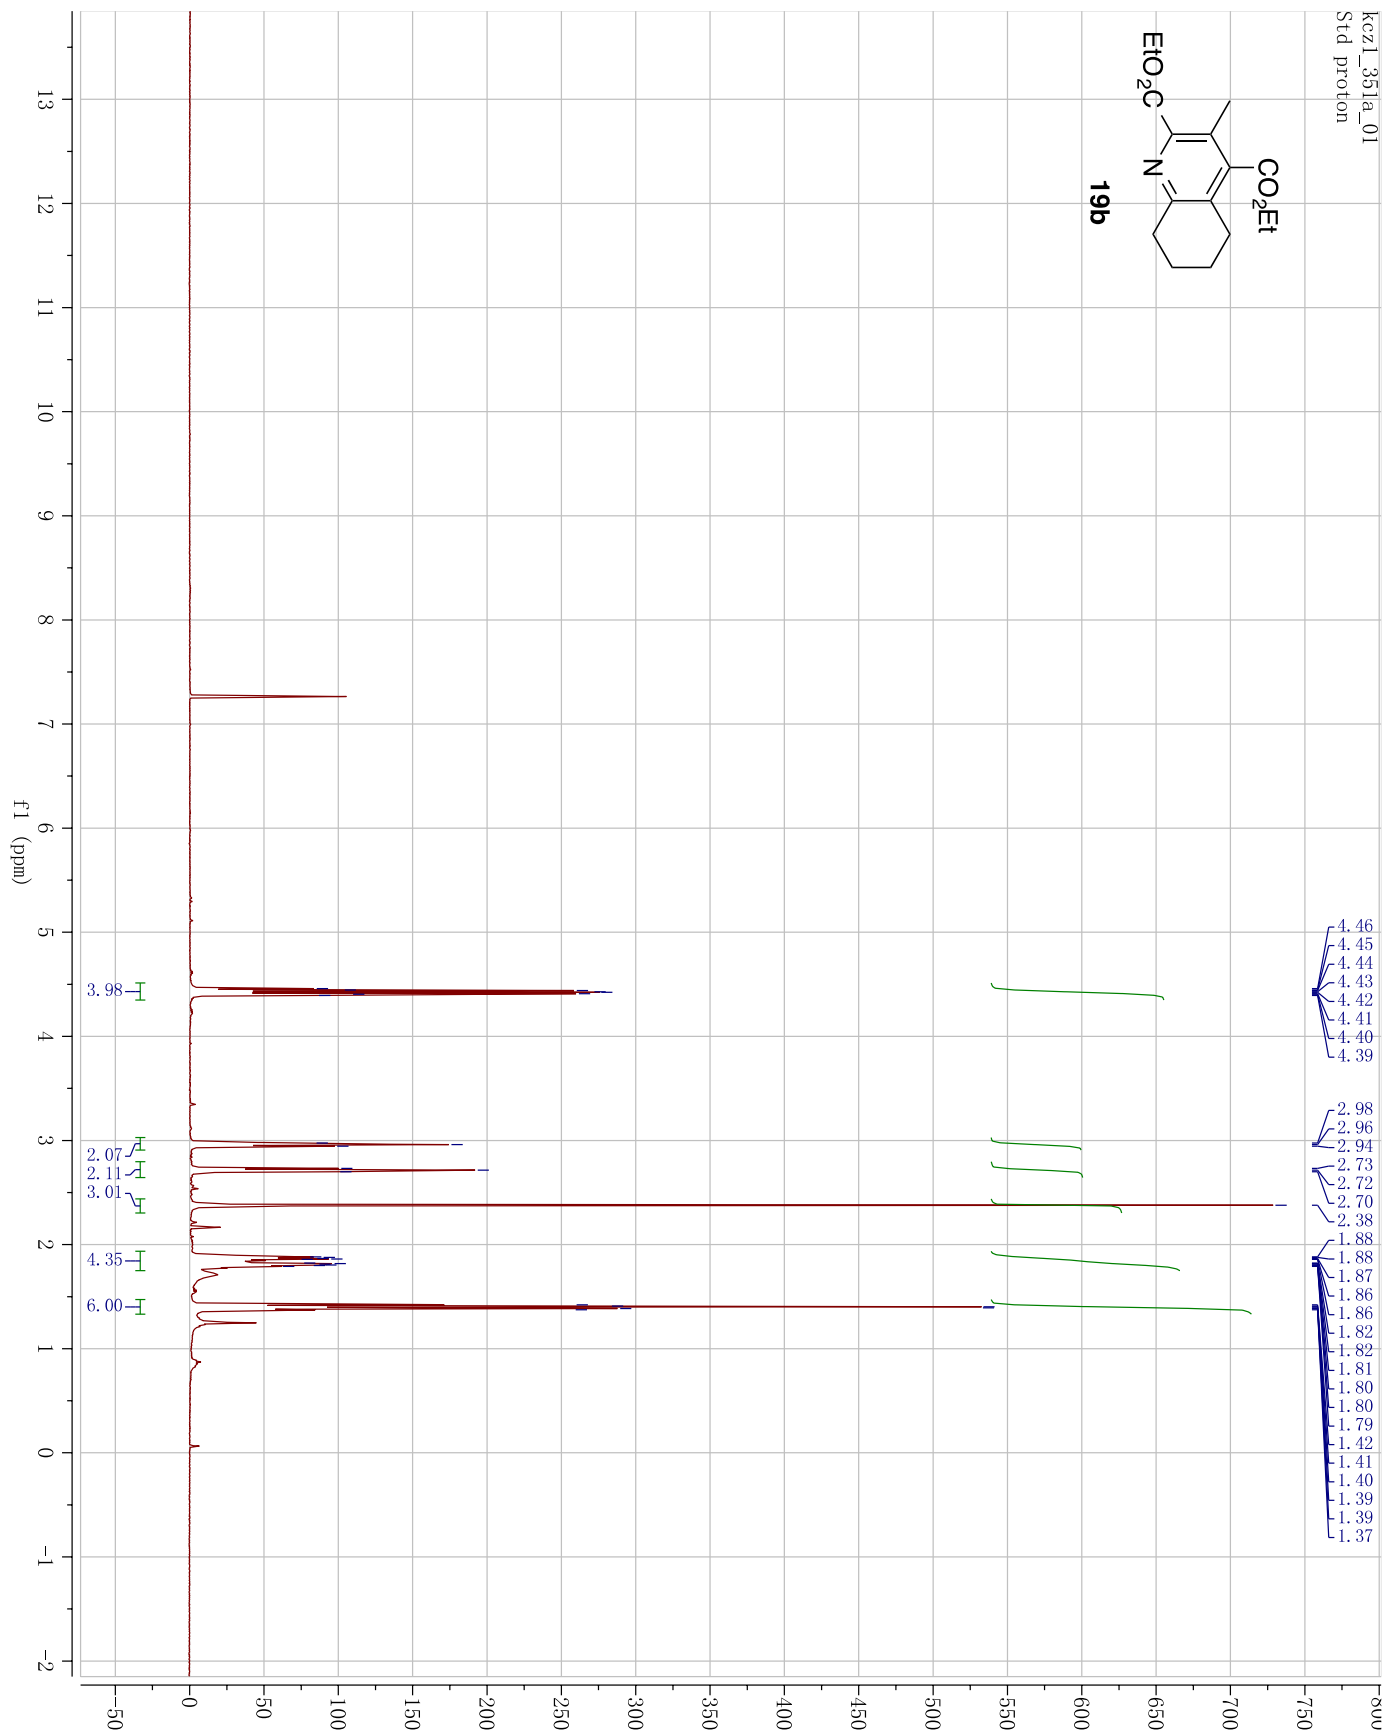

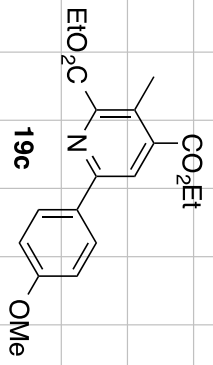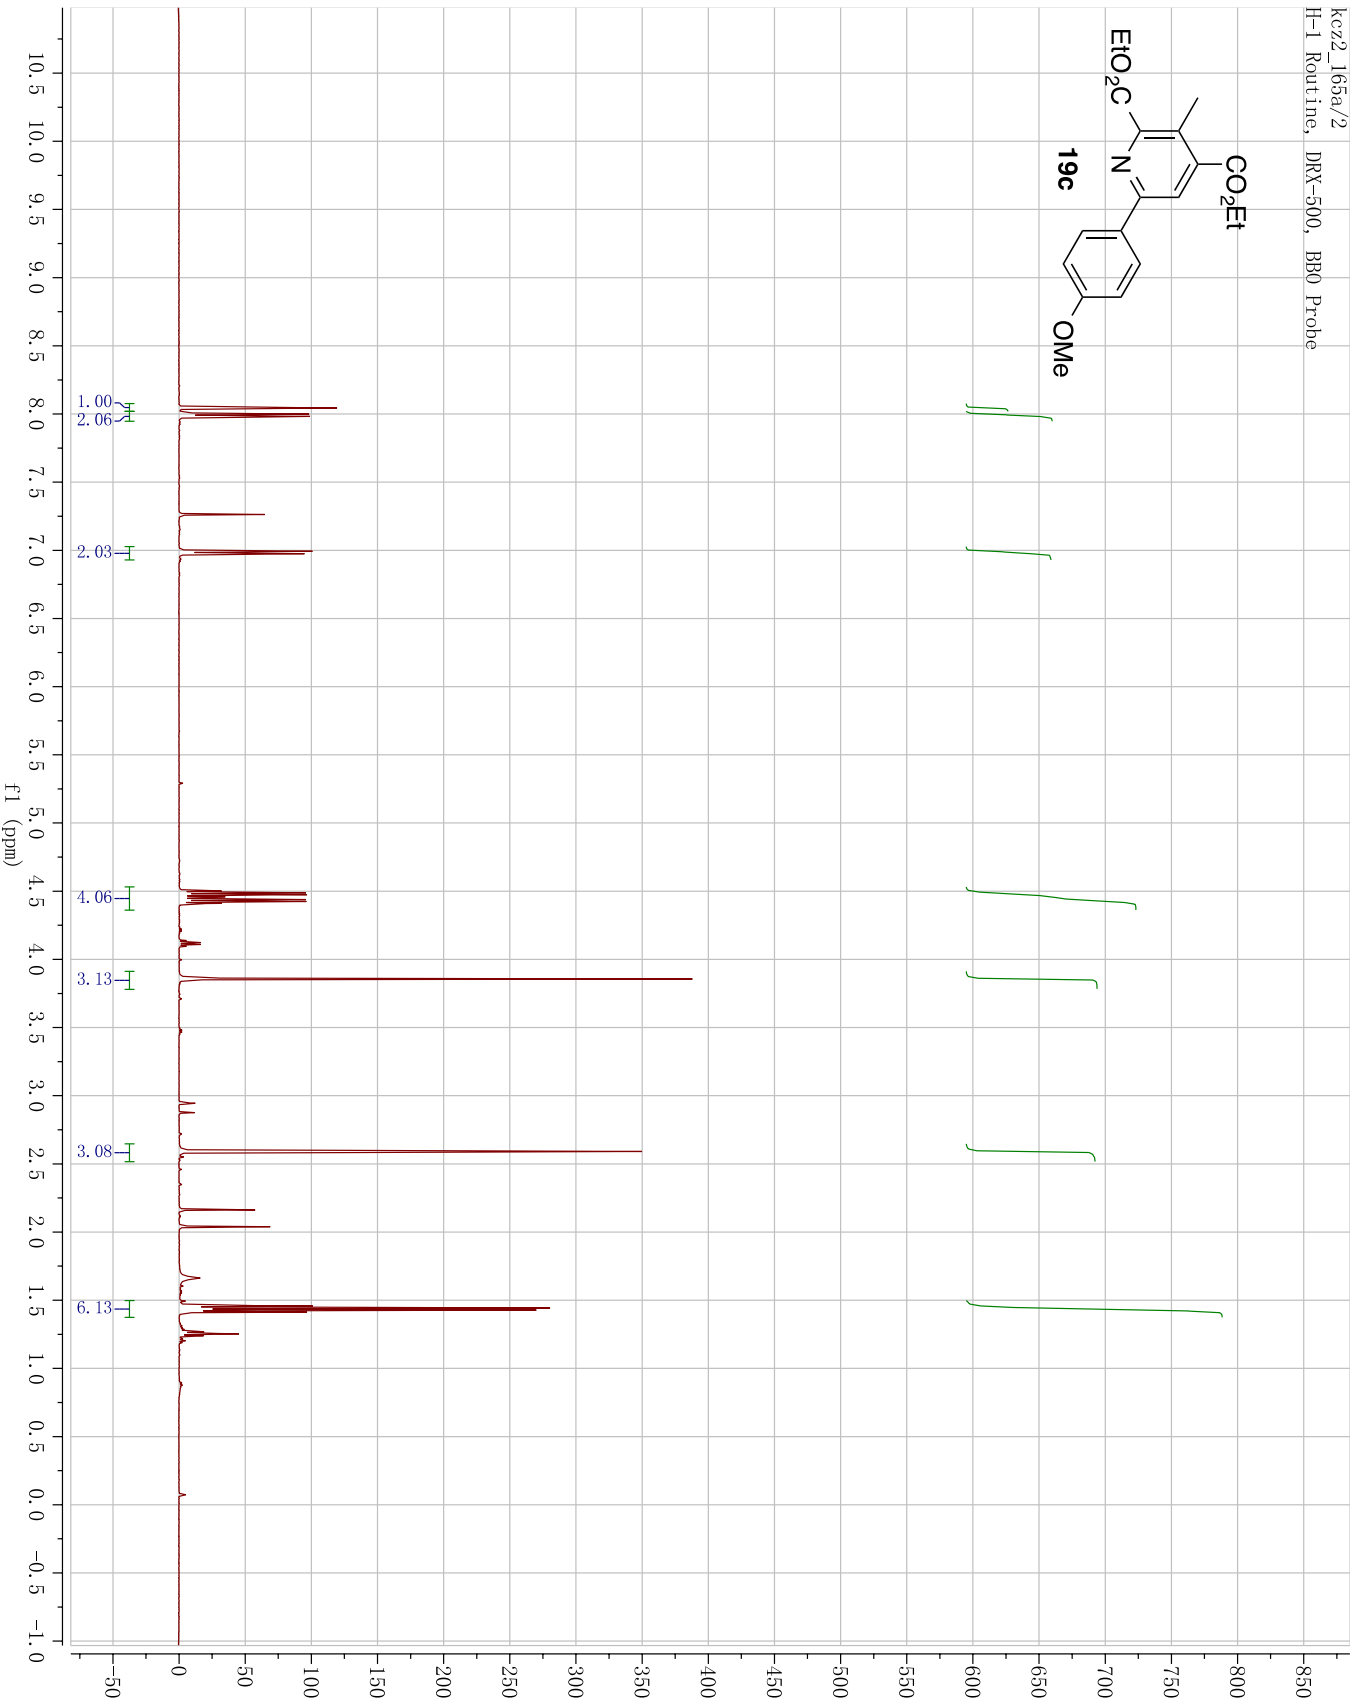

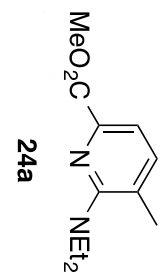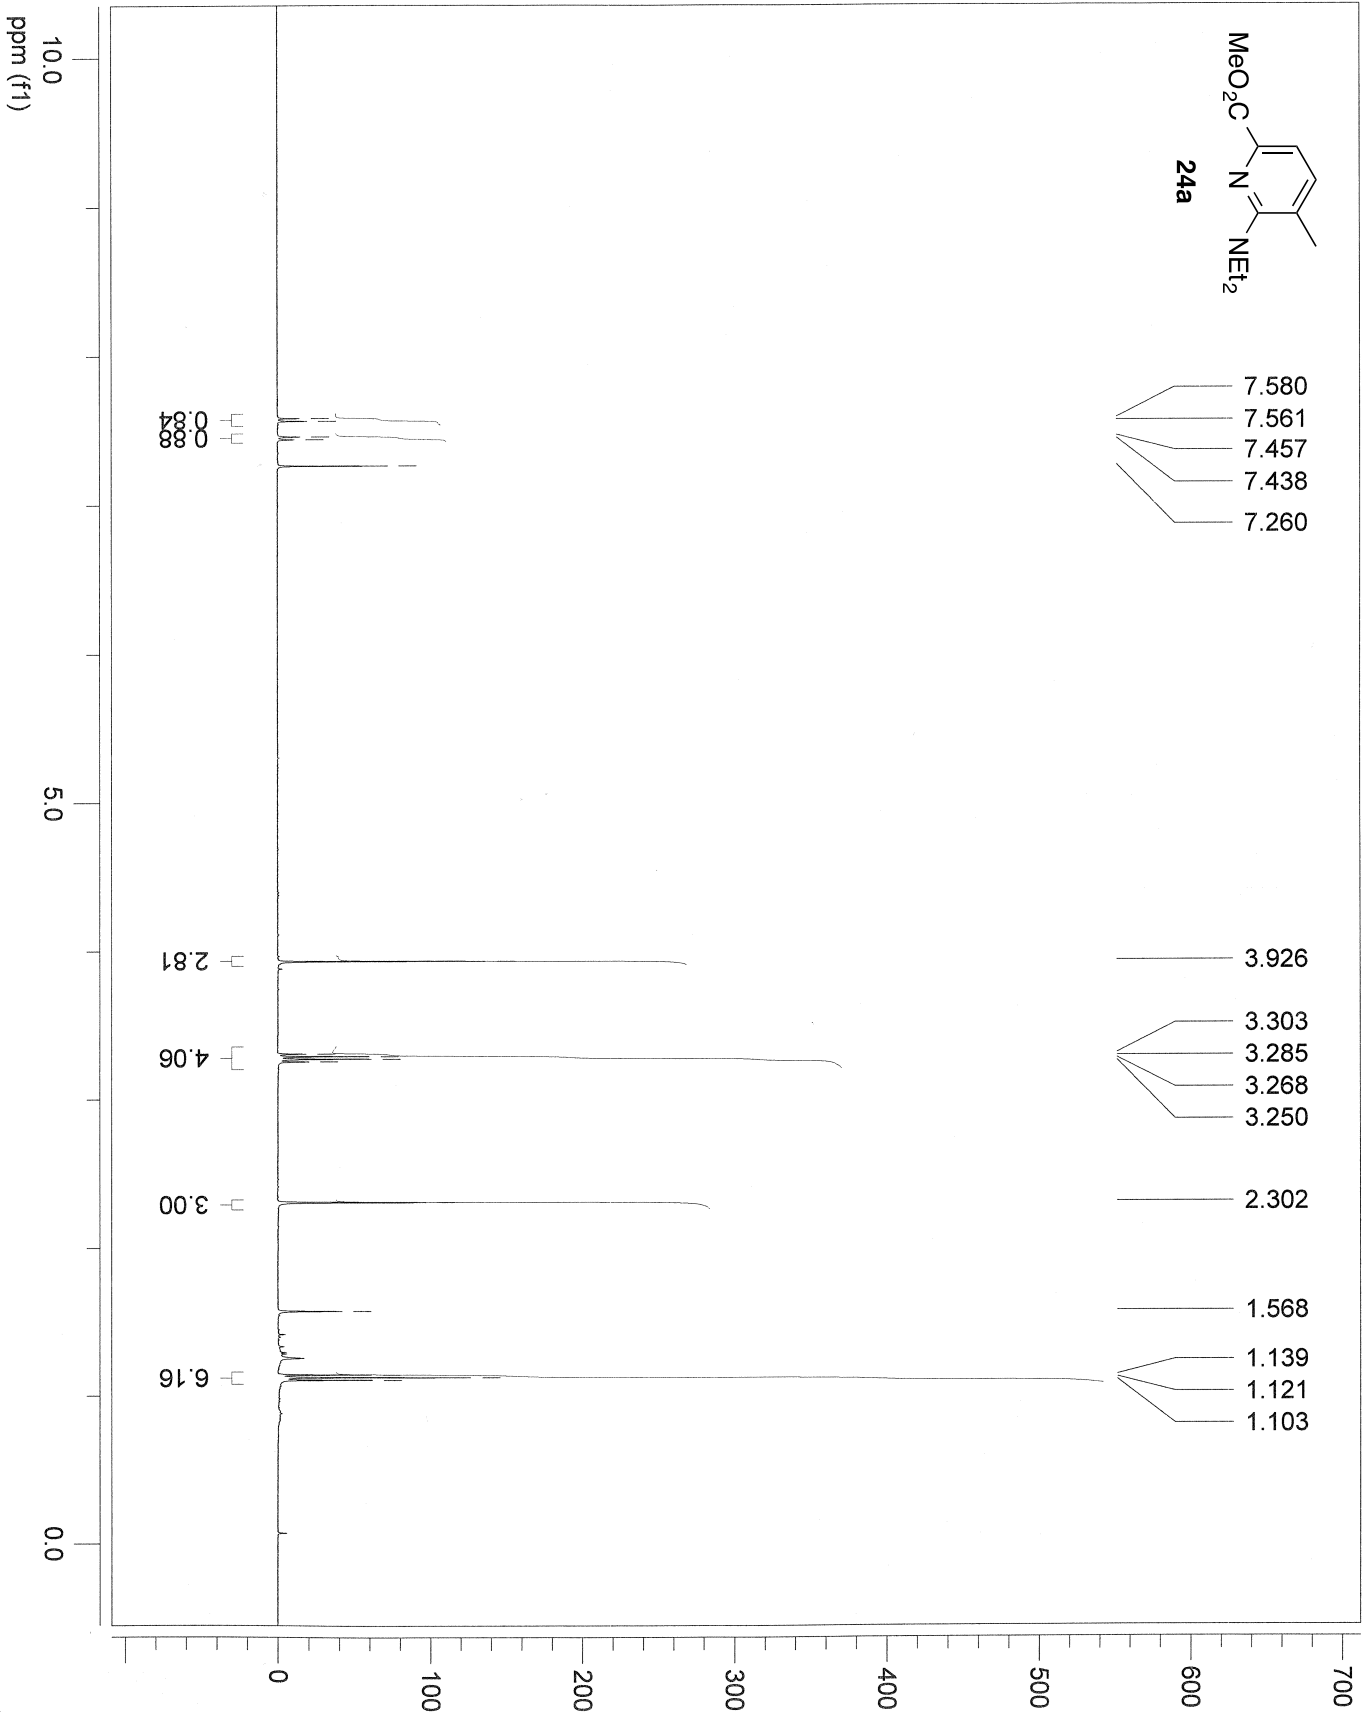

11



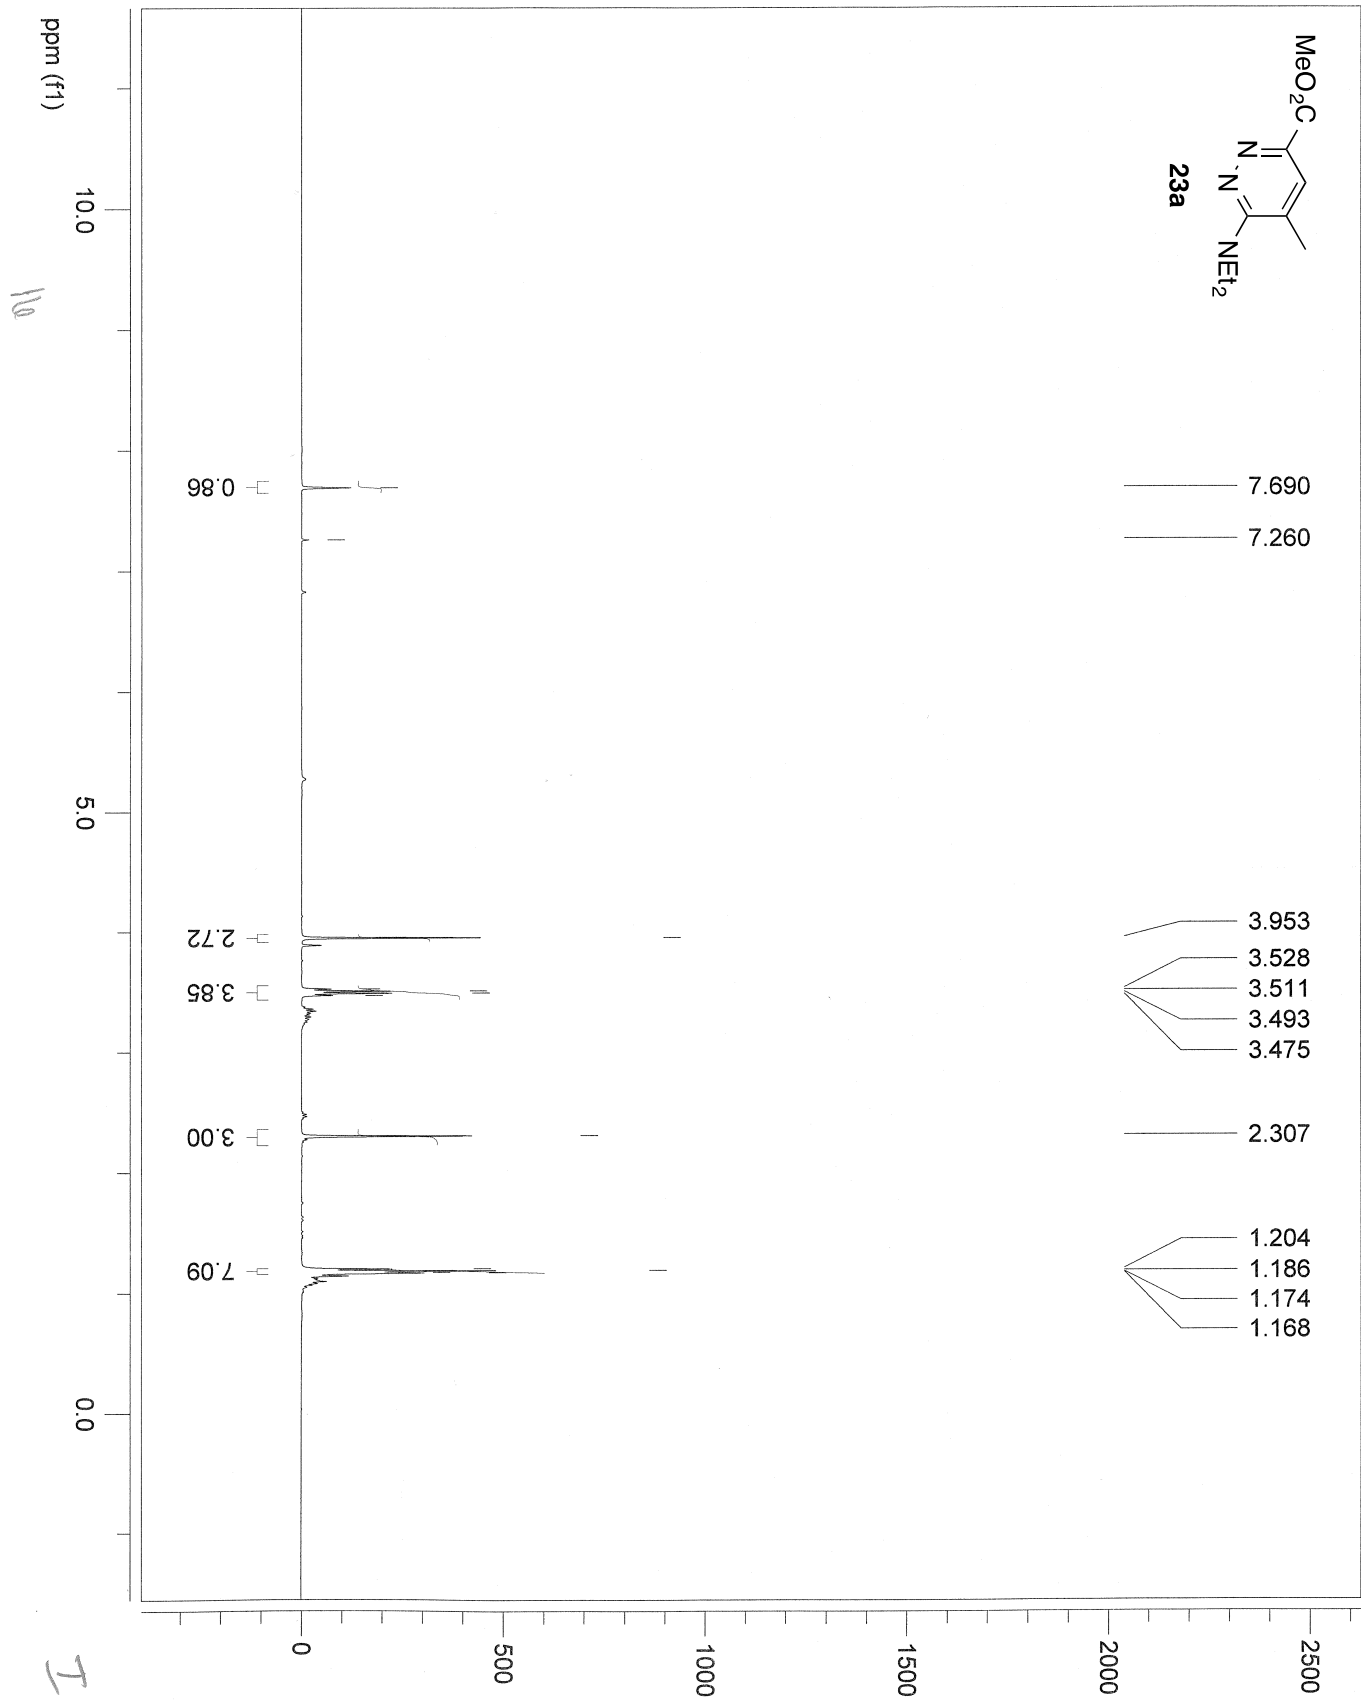

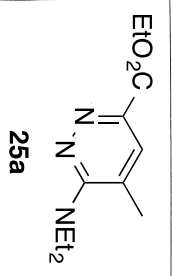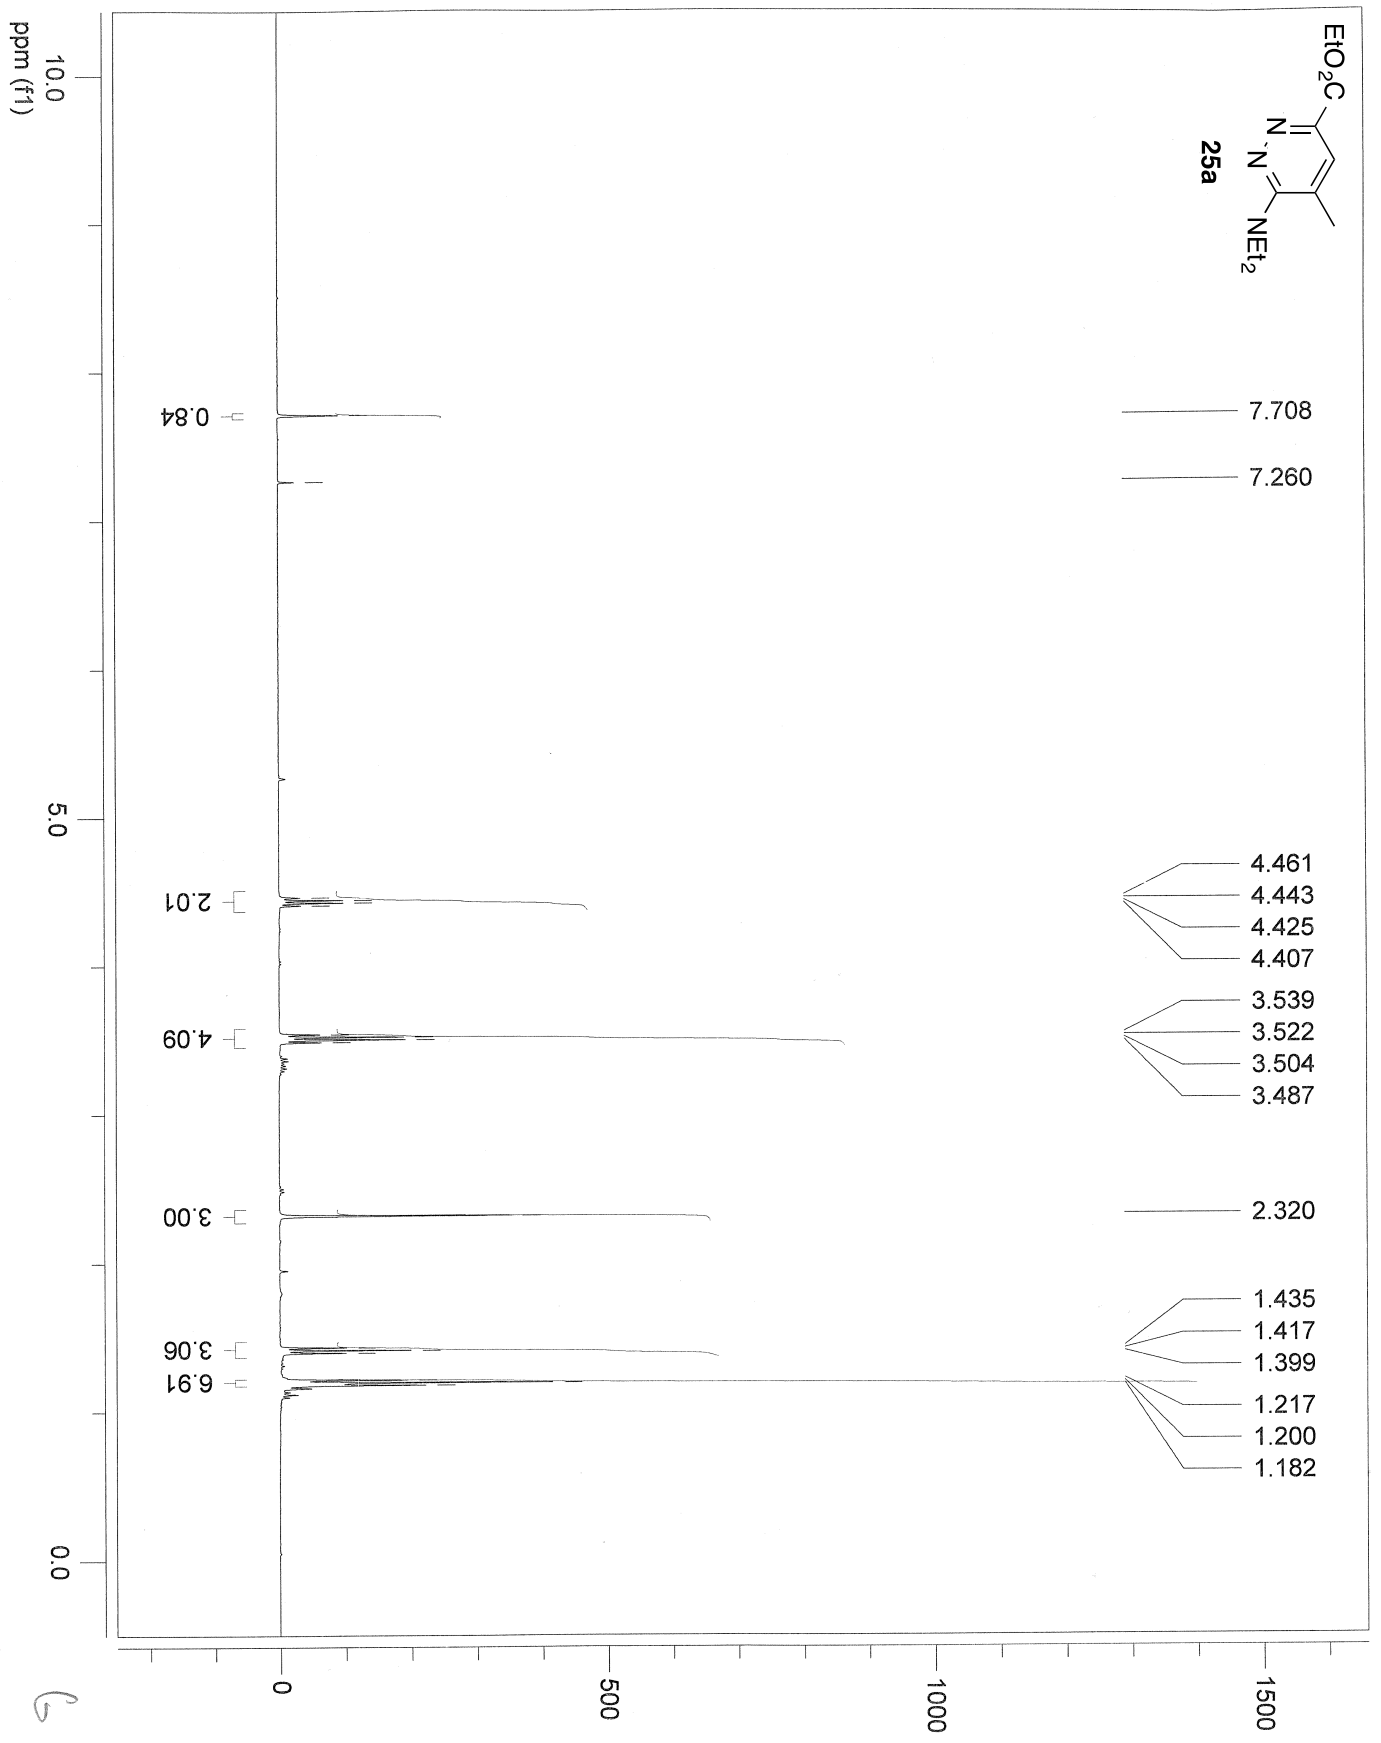

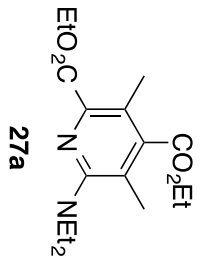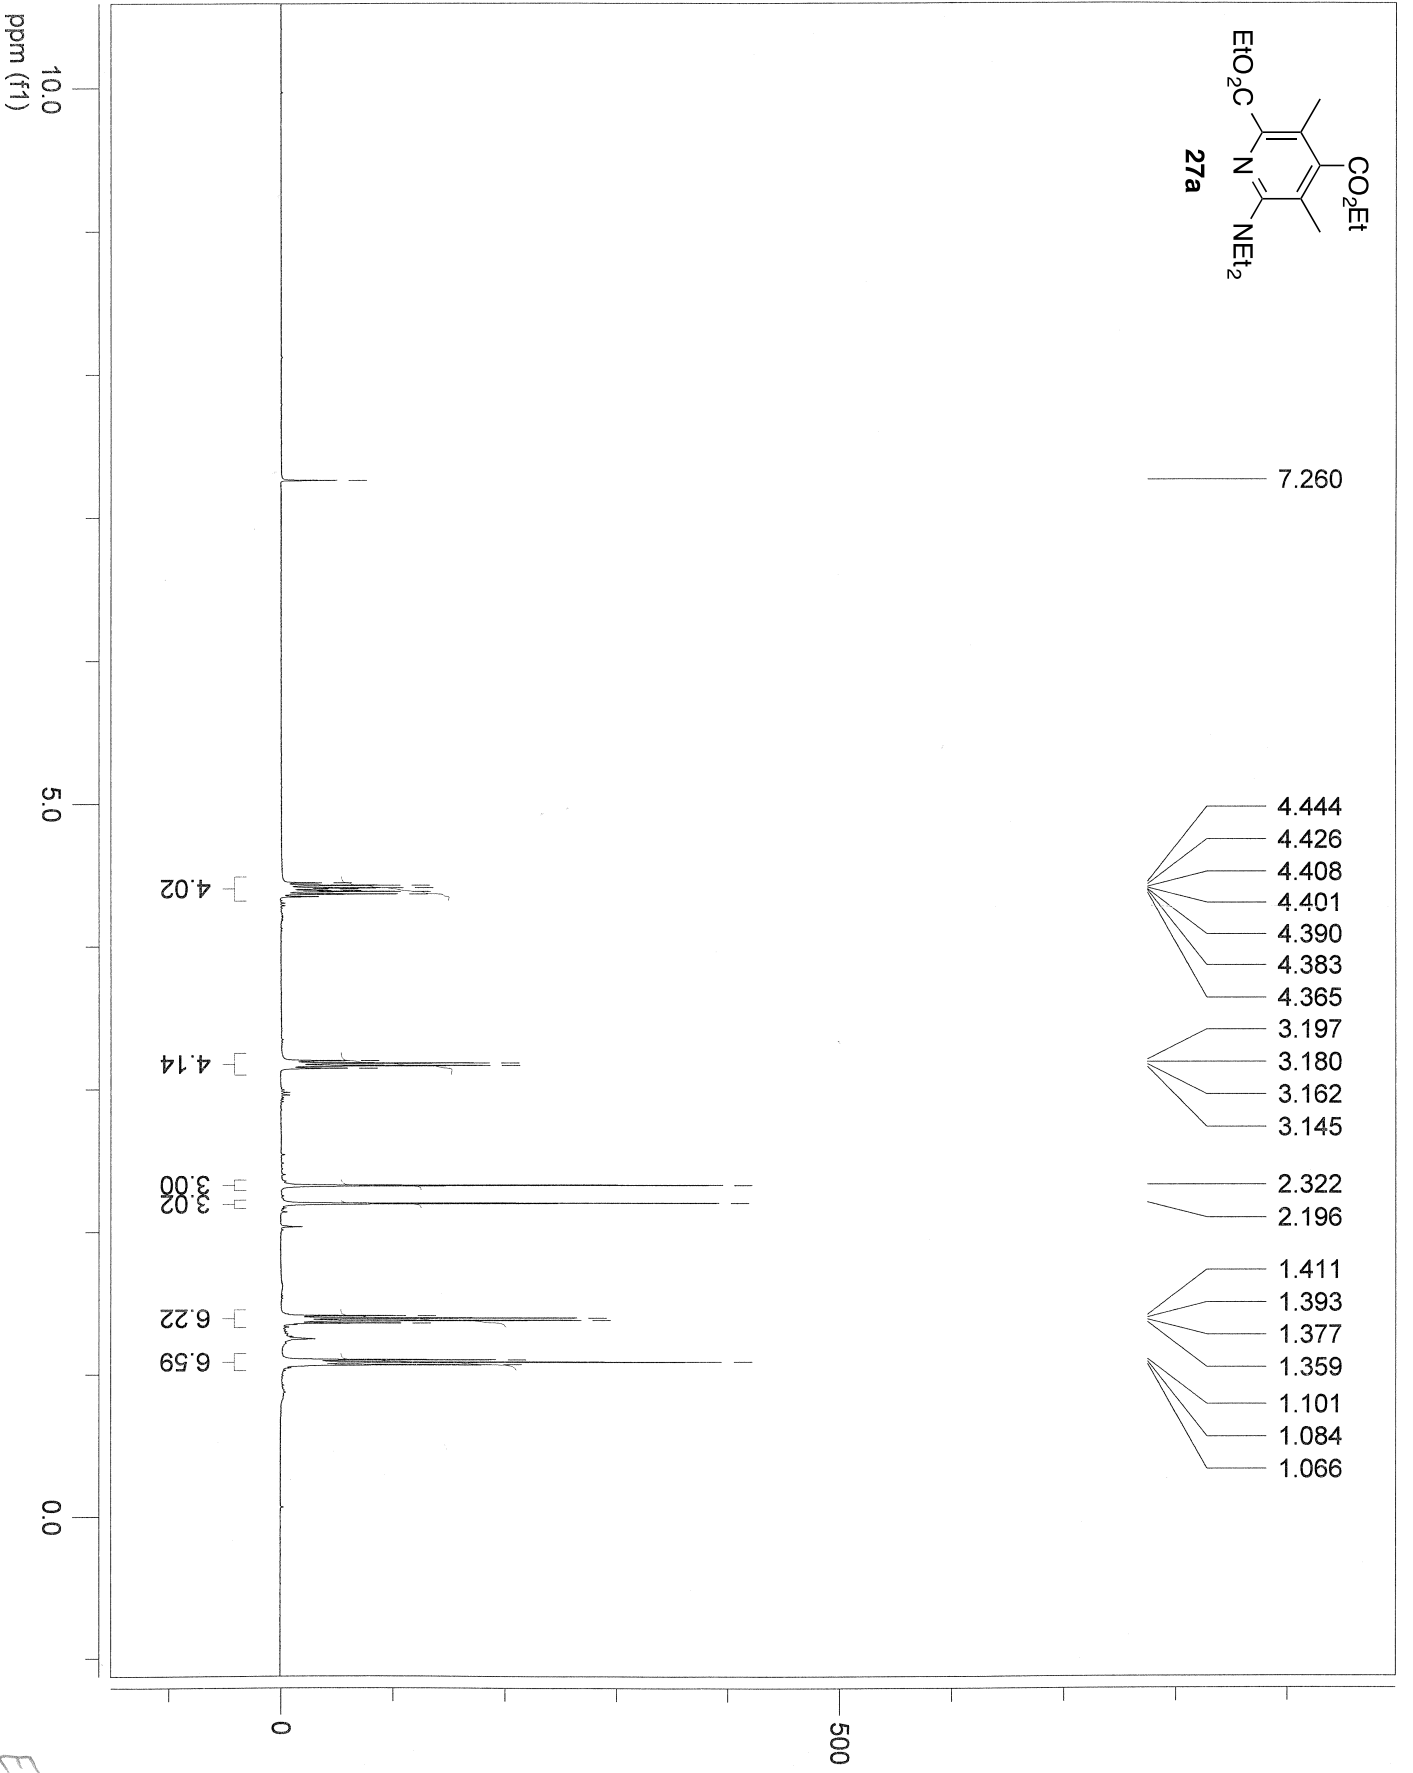

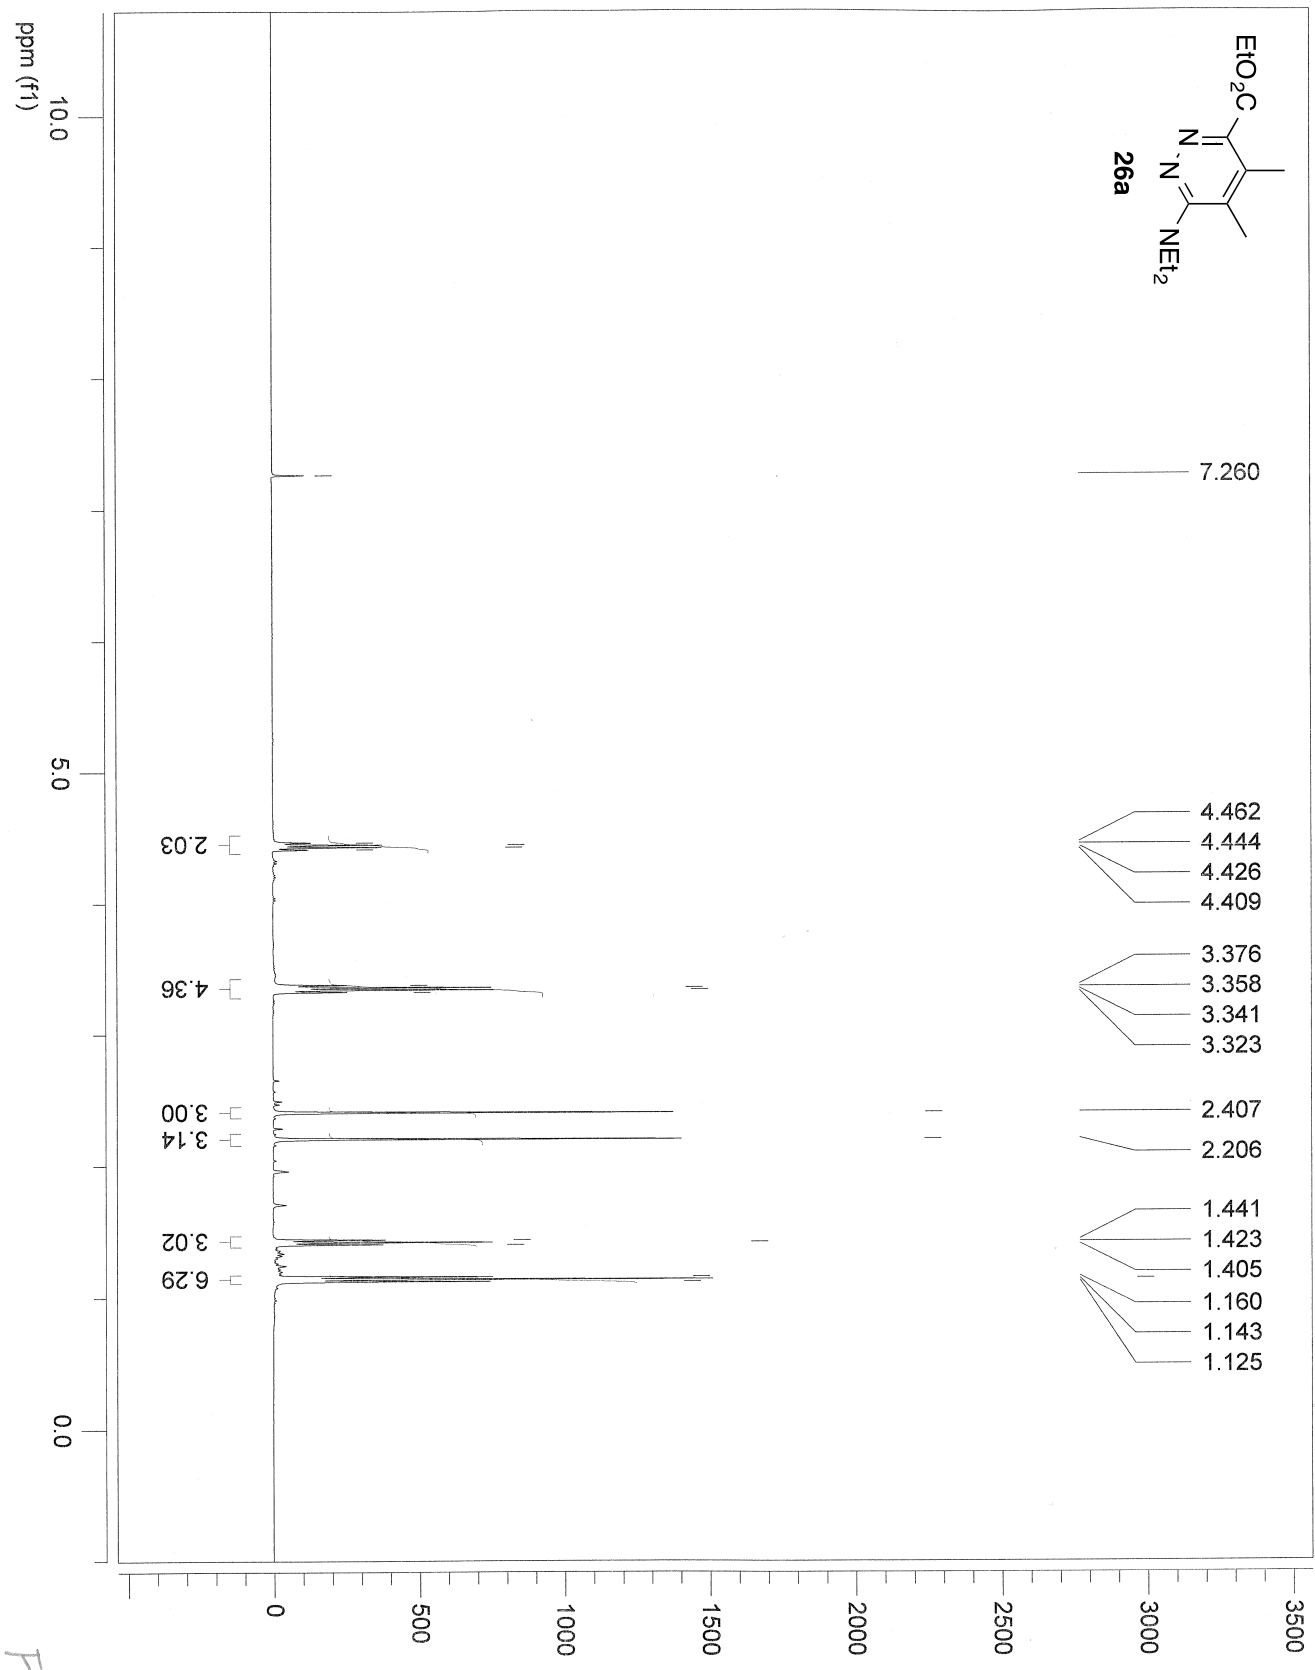

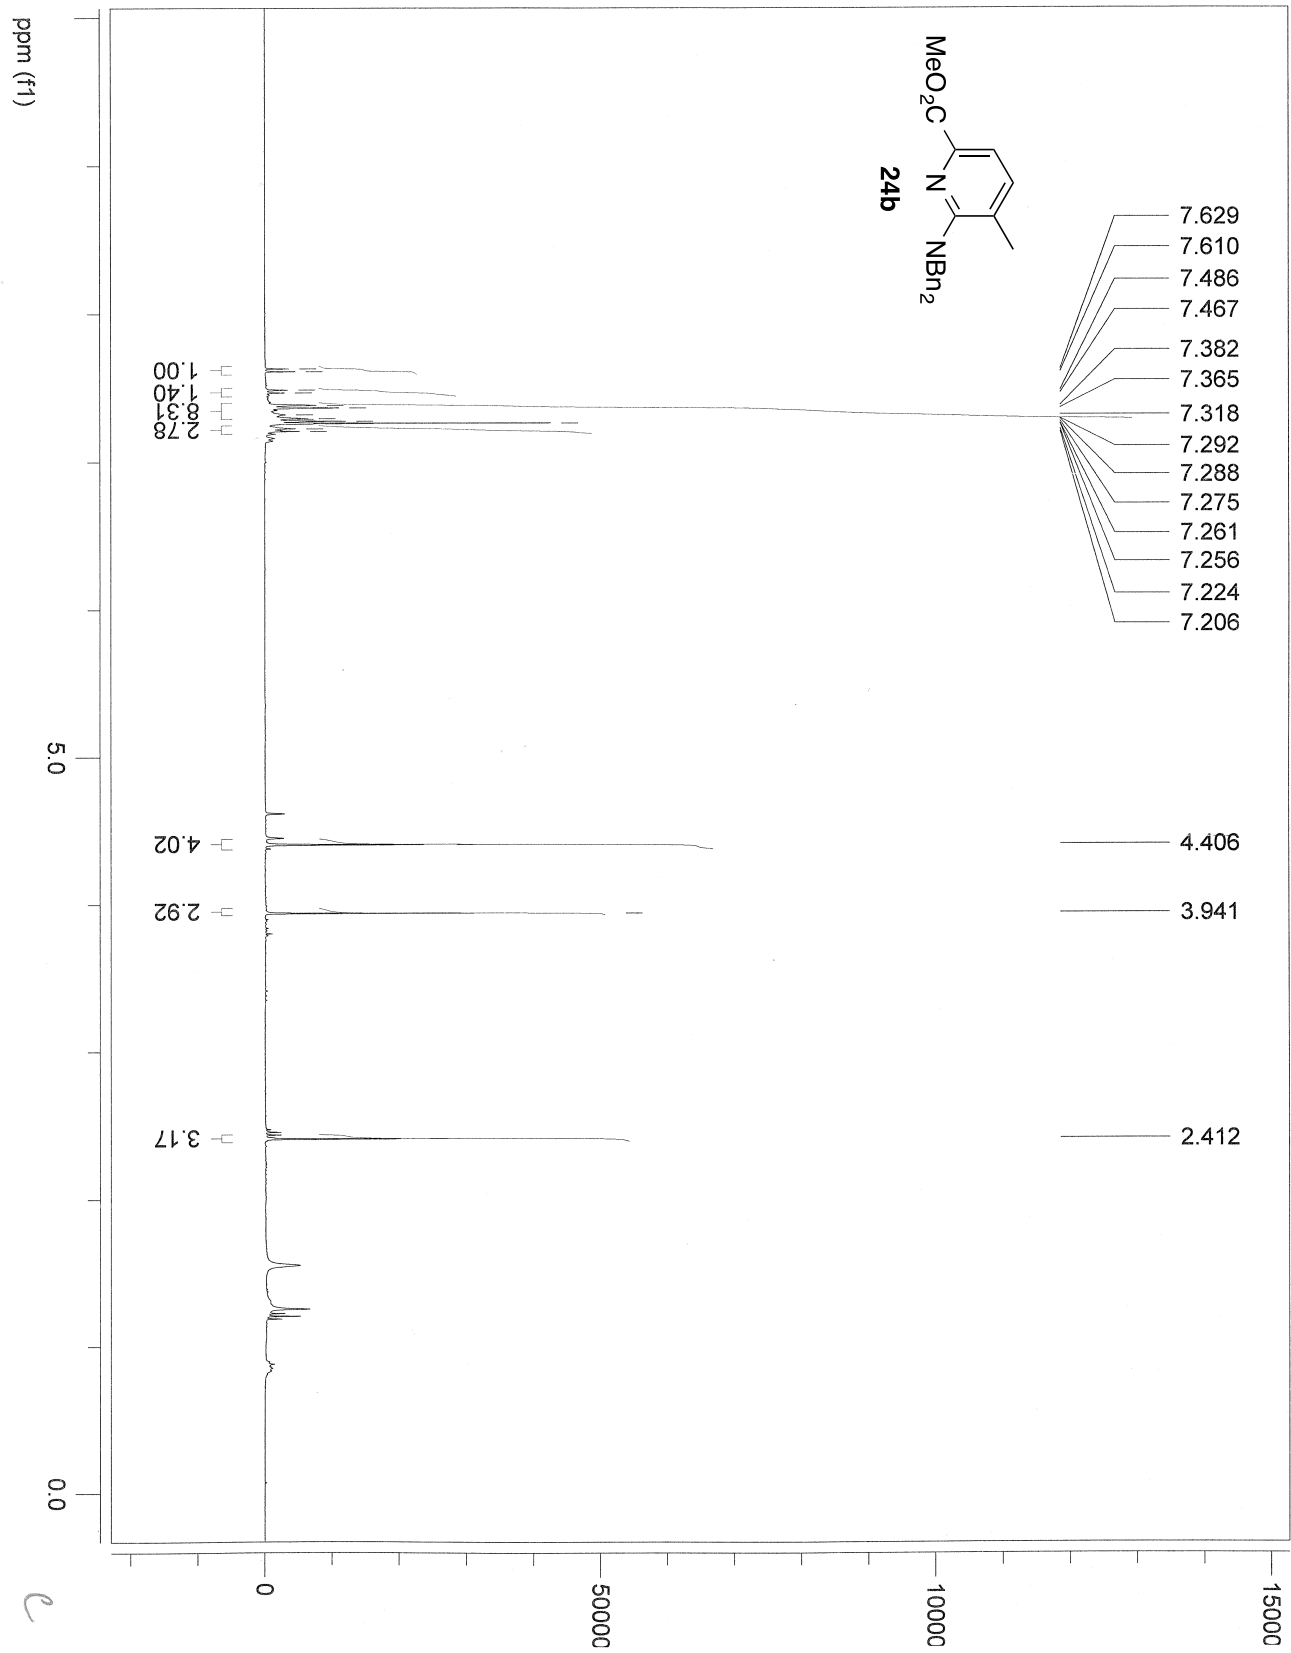

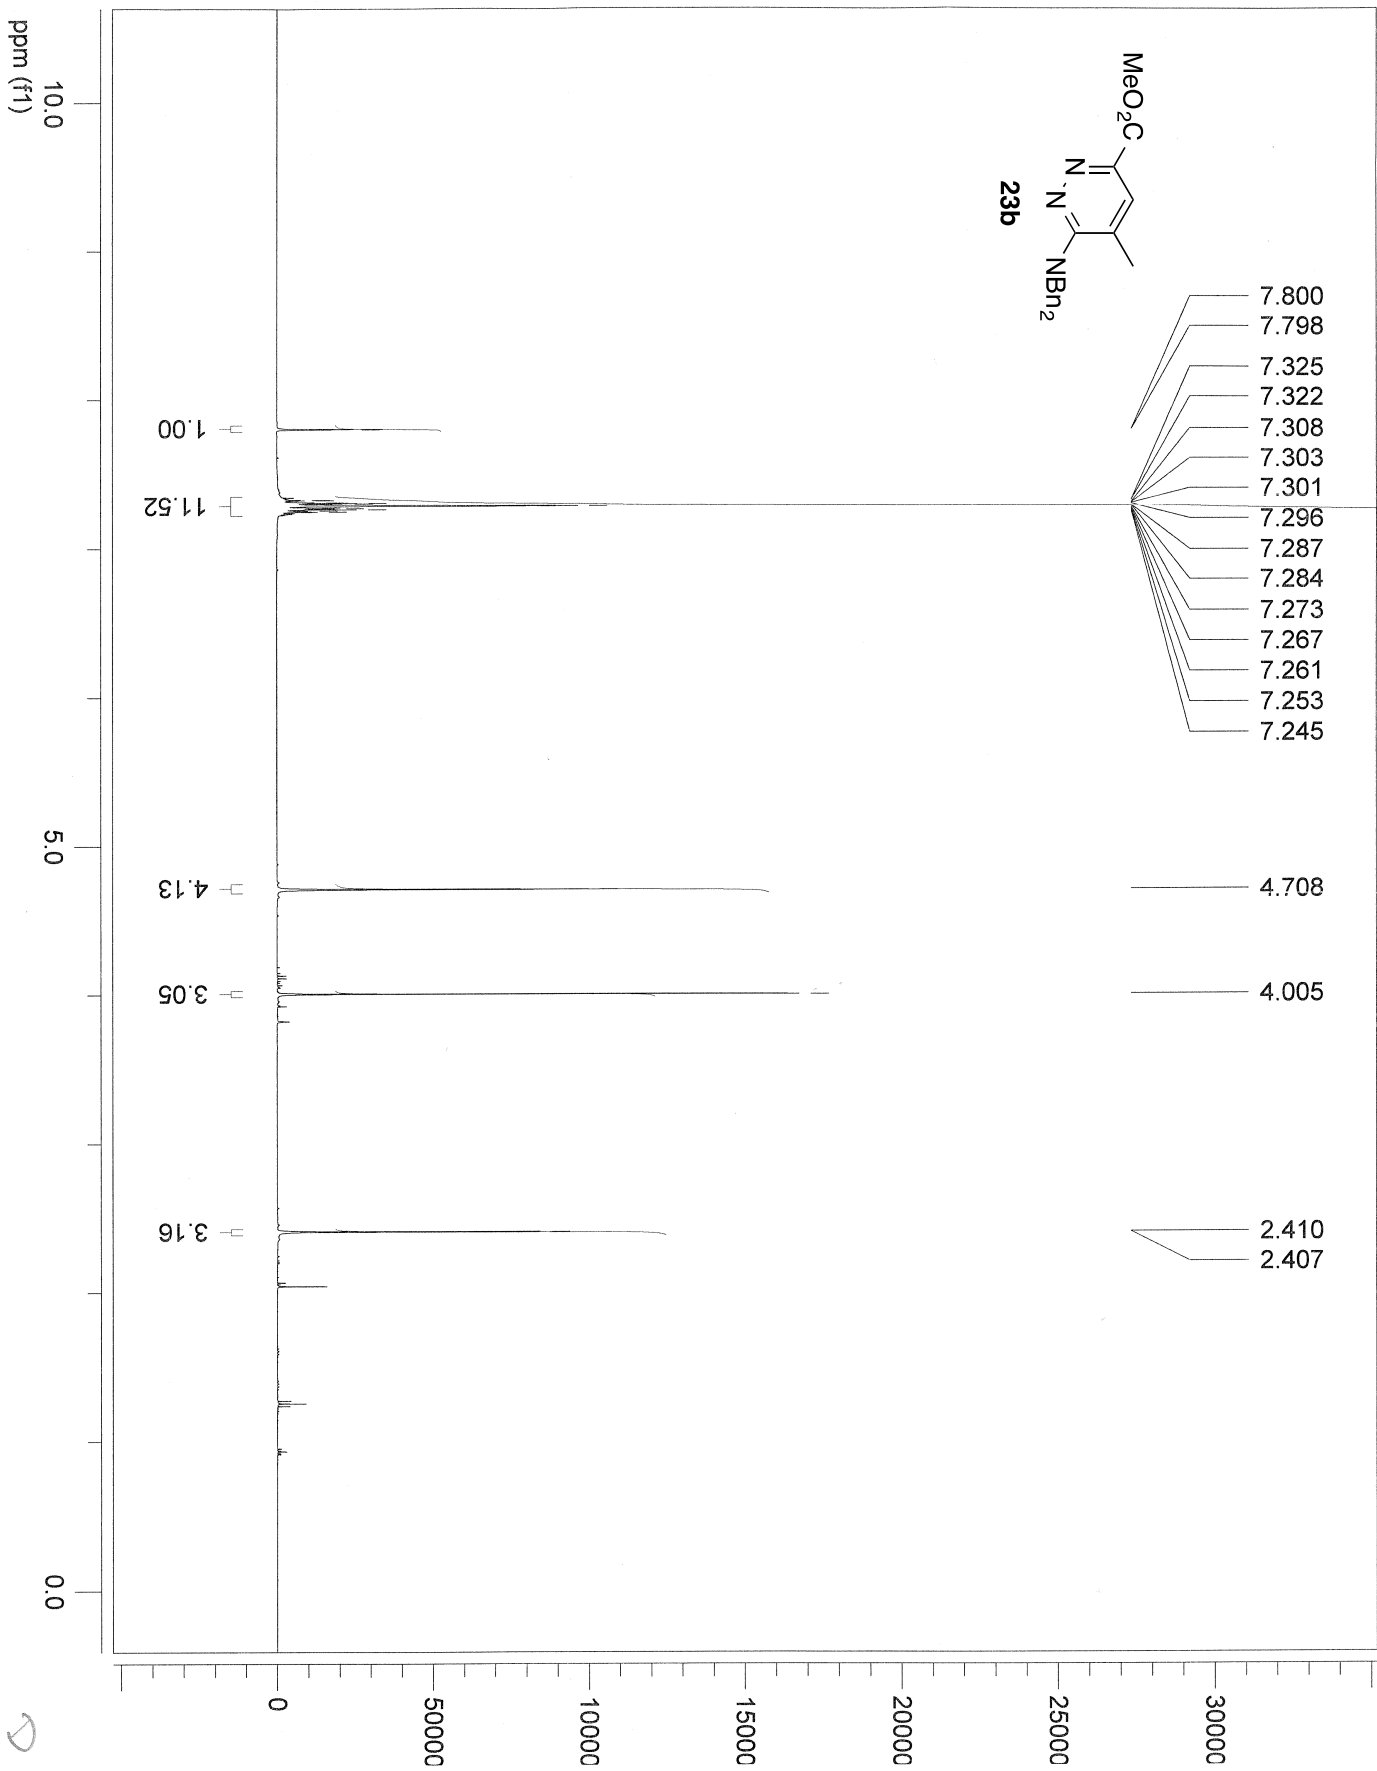

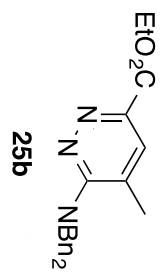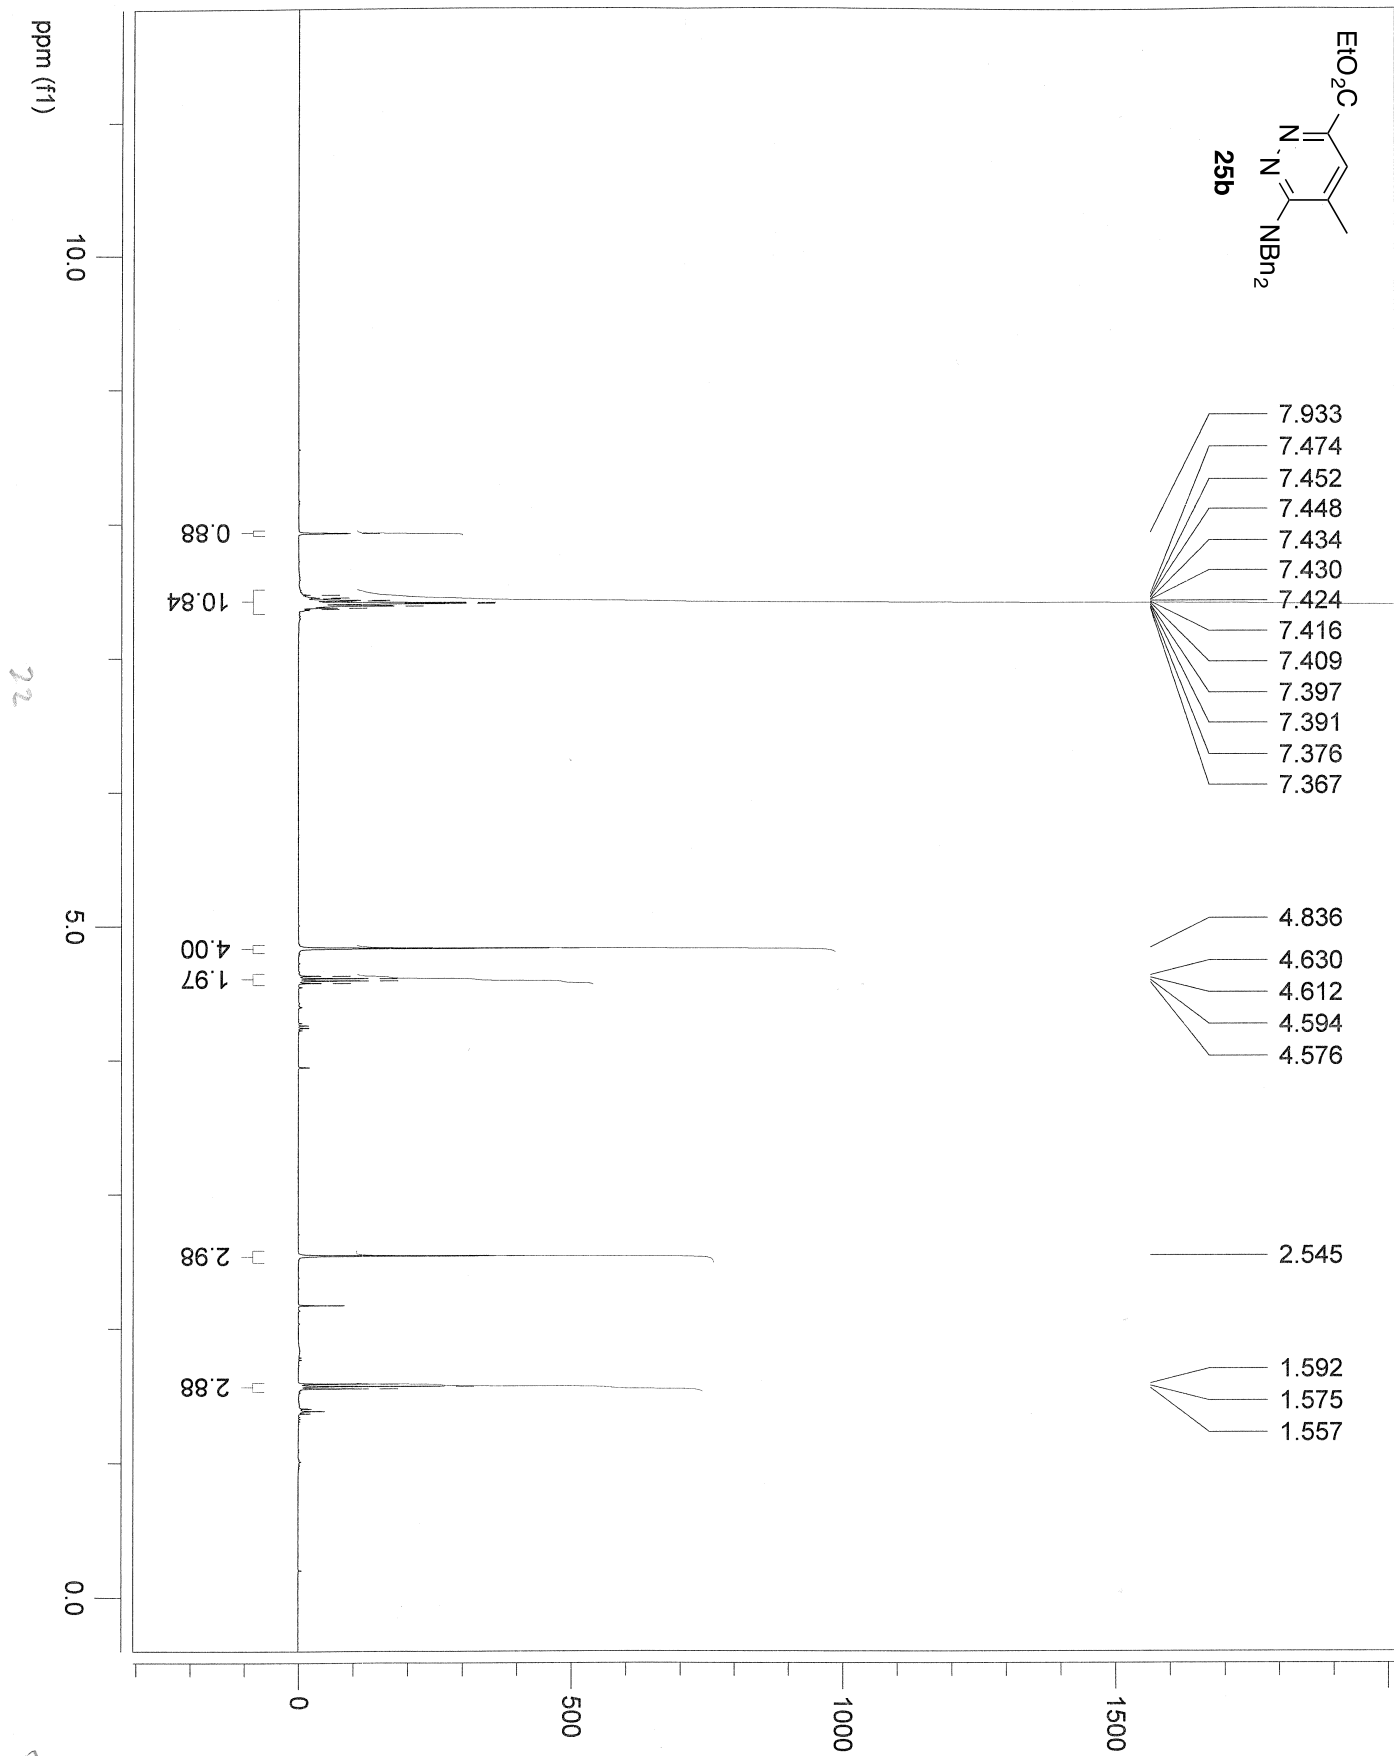

22

B

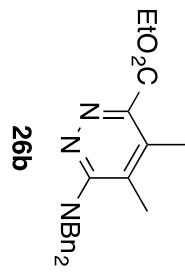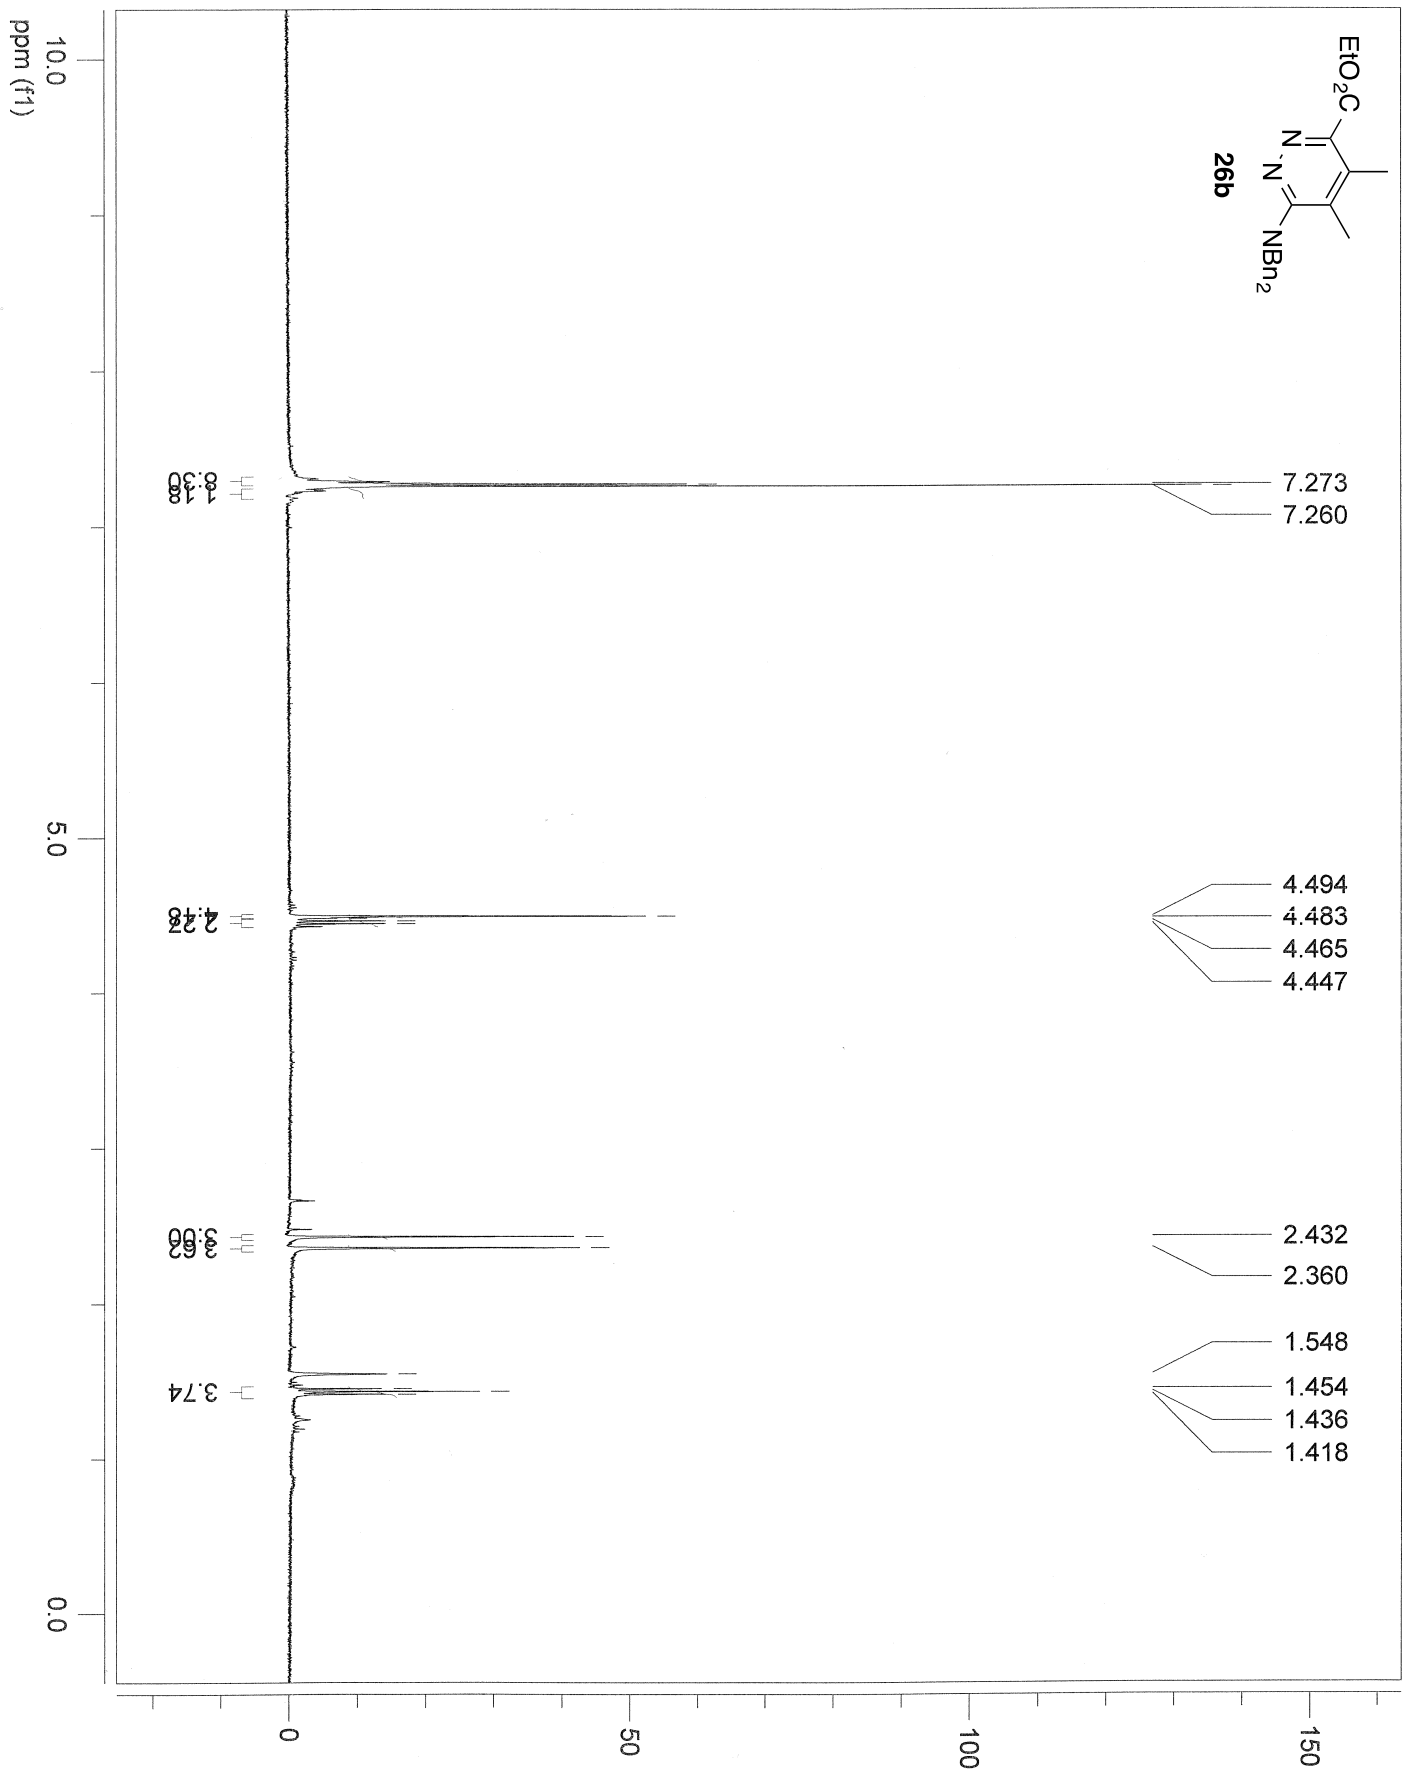

Supplement: ol502436n_si_001.pdf [file ol502436n_si_001.pdf]
